# Supplementary material for: Juvenile Hormone Membrane Signaling Enhances its Intracellular Signaling Through Phosphorylation of Met and Hsp83
Source: Front Physiol. 2022 Apr 27;13:872889. doi: 10.3389/fphys.2022.872889 (PMC9091338; doi:10.3389/fphys.2022.872889)
Supplement: Supplementary file 4 [file Table2.XLS]

## Sheet: UAS-BirA +JH
LC-MS analysis of competitive eluted proteins
Leading Protein	Protein IDs	Majority protein IDs	Peptide counts (all)	Peptide counts (razor+unique)	Peptide counts (unique)	Protein names	Gene names	Fasta headers	Number of proteins	Peptides	Razor + unique peptides	Unique peptides	Sequence coverage [%]	Unique + razor sequence coverage [%]	Unique sequence coverage [%]	Mol. weight [kDa]	Sequence length	Sequence lengths	Q-value	Score	Intensity	LFQ intensity	MS/MS count	MS/MS count	id	Peptide IDs	Peptide is razor	Mod. peptide IDs	Evidence IDs	MS/MS IDs	Best MS/MS	Oxidation (M) site IDs	Oxidation (M) site positions
Q59E58	Q59E58;A0A0B4JD57;A0A0B4JD95;Q59E59;A0A0B4K7Q4	Q59E58;A0A0B4JD57;A0A0B4JD95;Q59E59;A0A0B4K7Q4	28;28;27;27;27	28;28;27;27;27	2;2;2;1;1		zip	;;;;	5	28	28	2	16.8	16.8	1.4	226.91	1971	1971;1979;1964;2016;2024	0	193.41	165990000	165990000	29	29	0	13;18;20;27;47;62;72;73;91;184;189;208;212;240;260;265;268;283;287;331;334;376;378;380;394;430;456;493	True;True;True;True;True;True;True;True;True;True;True;True;True;True;True;True;True;True;True;True;True;True;True;True;True;True;True;True	13;18;20;27;48;64;74;75;98;201;206;225;229;260;281;286;289;305;309;356;359;411;413;415;429;467;495;534	15;16;24;26;33;56;77;93;94;123;262;267;296;301;342;368;375;379;401;405;470;473;573;575;577;596;653;686;737	23;24;40;42;53;88;124;154;155;210;501;507;599;614;690;753;771;775;831;838;839;982;986;1267;1270;1272;1312;1421;1478;1579	24;40;42;53;88;124;154;155;210;501;507;599;614;690;753;771;775;831;839;982;986;1267;1270;1272;1312;1421;1478;1579	0	365
Q9VEZ3	Q9VEZ3;E1JIM4;A0A0B4K664;A0A0B4K700	Q9VEZ3;E1JIM4;A0A0B4K664;A0A0B4K700	2;2;2;2	2;2;2;2	2;2;2;2		msps	;;;	4	2	2	2	1.4	1.4	1.4	225.98	2042	2042;2050;2074;2082	0	12.795	4176400	4176400	2	2	1	274;434	True;True	296;471	388;657	786;1427	786;1427
A0A0B4K7J2	A0A0B4K7J2	A0A0B4K7J2	2	2	2		Nup358		1	2	2	2	0.8	0.8	0.8	298.93	2718	2718	0	11.288	40776000	40776000	2	2	2	132;326	True;True	146;350	190;463	342;964	342;964
A0A0B4KF92	A0A0B4KF92;A0A0B4LGS6;Q9VNC3;A0A0B4LGM5	A0A0B4KF92;A0A0B4LGS6;Q9VNC3;A0A0B4LGM5	5;5;5;5	5;5;5;5	5;5;5;5		Hcs	;;;	4	5	5	5	5.3	5.3	5.3	110.35	993	993;999;1041;1047	0	29.356	12632000	12632000	4	4	3	2;50;285;573;574	True;True;True;True;True	2;51;307;619;620	2;59;403;859;860	2;93;835;1835;1836	2;93;835;1835;1836
A0A0B4KFZ9	A0A0B4KFZ9;P84040	A0A0B4KFZ9;P84040	2;2	2;2	2;2	Histone H4	His4r;His4	;	2	2	2	2	19.4	19.4	19.4	11.381	103	103;103	0	12.62	18569000	18569000	4	4	4	77;546	True;True	81;592	102;103;822	169;170;1766;1767	169;1767
Q4AB57	Q4AB57;A0A0B4KH25;P84051;P08985	Q4AB57;A0A0B4KH25;P84051;P08985	1;1;1;1	1;1;1;1	1;1;1;1	Histone H2A;Histone H2A.v	His2A:CG33859;His2Av;His2A	;;;	4	1	1	1	7.3	7.3	7.3	13.364	124	124;141;124;141	0	6.9274	6223900	6223900	2	2	5	10	True	10	12	18;19	18
A0A0B4LGC0	A0A0B4LGC0;A0A0B4LF88;Q9V6K1	A0A0B4LGC0;A0A0B4LF88;Q9V6K1	2;2;2	2;2;2	2;2;2	Tripeptidyl-peptidase 2	TppII	;;	3	2	2	2	1.4	1.4	1.4	148.91	1354	1354;1375;1441	0	14.676	3304200	3304200	2	2	6	68;561	True;True	70;607	88;843	147;1811	147;1811
A0A0B4LFL2	A0A0B4LFL2;A1ZAX1	A0A0B4LFL2;A1ZAX1	2;2	2;2	2;2	Eukaryotic translation initiation factor 3 subunit C	eIF3-S8	;	2	2	2	2	2	2	2	105.65	910	910;910	0	11.713	5041300	5041300	1	1	7	116;492	True;True	126;533	165;736	300;1578	300;1578
X2JCP8	X2JCP8;M9PFZ6;A0A0B4LH50;P83967;P53501;P10987;P10981;P02574;P02572	X2JCP8;M9PFZ6;A0A0B4LH50;P83967;P53501;P10987;P10981;P02574;P02572	2;2;2;2;2;2;2;2;2	2;2;2;2;2;2;2;2;2	2;2;2;2;2;2;2;2;2	Actin, indirect flight muscle;Actin-57B;Actin-5C;Actin-87E;Actin, larval muscle;Actin-42A	Act5C;Act79B;Act87E;Act88F;Act57B;Act42A	;;;;;;;;	9	2	2	2	7.4	7.4	7.4	41.821	376	376;376;376;376;376;376;376;376;376	0	13.687	10381000	10381000	2	2	8	187;533	True;True	204;579	265;801	505;1696	505;1696
A1Z784	A1Z784;Q7JV23;A8DY67	A1Z784;Q7JV23;A8DY67	122;117;116	122;117;116	122;117;116		ACC	;;	3	122	122	122	46.1	46.1	46.1	278.59	2482	2482;2323;2348	0	323.31	45737000000	42940000000	725	725	9	4;15;16;32;33;43;52;61;63;64;66;67;76;80;82;93;94;95;96;102;104;111;112;120;122;124;134;140;153;158;159;162;164;172;177;178;179;197;199;200;201;202;206;210;211;215;219;221;222;227;241;242;247;248;249;250;251;254;255;258;259;264;267;270;275;280;281;294;295;302;306;315;316;321;323;329;330;356;357;358;359;383;384;385;386;387;391;396;401;407;408;409;410;414;415;420;421;423;424;429;439;476;489;496;498…	True;True;True;True;True;True;True;True;True;True;True;True;True;True;True;True;True;True;True;True;True;True;True;True;True;True;True;True;True;True;True;True;True;True;True;True;True;True;True;True;True;True;True;True;True;True;True;True;True;True;True;True;True;True;True;True;True;True;True;True;True;True;True;True;True;True;True;True;True;True;True;True;True;True;True;True;True;True;True;True…	4;15;16;32;33;34;44;53;63;65;66;68;69;79;80;84;86;100;101;102;103;111;113;114;121;122;131;132;135;137;148;154;169;170;175;176;179;181;189;194;195;196;214;216;217;218;219;223;227;228;232;236;237;239;240;245;246;261;262;267;268;269;270;271;274;275;279;280;285;288;291;297;302;303;316;317;324;329;330;339;340;345;347;353;354;355;382;383;384;385;386;387;388;418;419;420;421;422;426;431;436;443;444;445;4…	4;18;19;20;21;22;39;40;41;52;61;62;74;75;76;78;79;80;81;83;84;85;86;87;100;101;106;107;108;109;111;125;126;127;128;129;130;131;132;133;134;135;144;146;147;148;149;150;151;159;160;161;171;172;173;174;177;180;192;193;194;201;202;203;220;221;226;227;228;231;232;233;235;236;246;247;253;254;255;256;257;276;277;278;280;281;282;283;284;285;286;287;288;292;293;298;299;300;304;308;309;310;311;313;314;319;…	4;26;27;28;29;30;31;32;33;34;35;36;37;38;61;62;63;64;65;66;67;83;95;96;97;98;99;100;101;118;119;120;121;122;123;125;126;127;128;129;130;131;132;133;135;136;137;138;139;140;141;142;143;144;145;146;164;165;166;167;168;174;175;176;177;178;179;180;181;182;183;185;186;213;214;215;216;217;218;219;220;221;222;223;224;225;226;227;228;229;230;231;249;250;251;252;253;254;255;256;257;258;259;261;262;263;264…	4;27;36;62;66;83;96;119;125;131;136;146;168;177;185;218;228;229;231;250;267;286;289;312;322;327;350;370;406;432;434;443;448;464;480;489;493;534;544;570;575;579;593;603;606;620;629;643;647;656;691;695;708;711;715;724;725;728;734;746;751;768;774;777;806;824;826;849;855;882;908;934;940;951;956;969;976;1035;1049;1052;1057;1277;1278;1281;1282;1284;1303;1323;1337;1359;1367;1378;1379;1386;1389;1399;1402…	1;2;3;4;5;6;7;8;9;10;11;12;13;14;15;16;17;18;19;20;21;22;23;24	286;298;379;446;486;541;770;834;902;1058;1157;1332;1516;1531;1614;1779;1790;2057;2095;2128;2184;2187;2236;2329
Q7JYK1	Q7JYK1;R9PY16;Q9W418;A4V1F9;P18101;P15357;P0CG69	Q7JYK1;R9PY16;Q9W418;A4V1F9;P18101;P15357;P0CG69	3;3;3;3;3;3;3	3;3;3;3;3;3;3	3;3;3;3;3;3;3	Ubiquitin-60S ribosomal protein L40;Ubiquitin;60S ribosomal protein L40;Ubiquitin-40S ribosomal protein S27a;Ubiquitin;40S ribosomal protein S27a;Polyubiquitin;Ubiquitin	RpL40;Ubi-p5E;Ubi-p63E;RpS27A	;;;;;;	7	3	3	3	26.6	26.6	26.6	14.729	128	128;301;534;763;128;156;763	0	19.469	42170000	42170000	5	5	11	127;497;506	True;True;True	140;538;547	183;184;742;753	332;333;1587;1588;1609	333;1588;1609
O61380	O61380;A8DZ29	O61380;A8DZ29	3;3	3;3	3;3		eIF4G	;	2	3	3	3	2.3	2.3	2.3	183.94	1666	1666;1919	0	17.571	9505000	9505000	3	3	12	40;339;571	True;True;True	41;364;617	49;479;857	79;994;1832	79;994;1832	25	669
C7LA75	C7LA75;P11147	C7LA75;P11147	11;11	11;11	8;8	Heat shock 70 kDa protein cognate 4	Hsc70-4-RA;Hsc70-4	;	2	11	11	8	20.3	20.3	13.5	71.131	651	651;651	0	73.507	92213000	92213000	20	20	14	44;48;139;204;231;348;475;483;523;542;588	True;True;True;True;True;True;True;True;True;True;True	45;49;153;221;250;373;515;524;566;588;635	53;57;200;290;329;497;498;712;722;723;778;817;876	84;89;363;586;672;673;1017;1018;1019;1530;1531;1554;1555;1556;1557;1653;1757;1758;1759;1864	84;89;363;586;673;1017;1531;1556;1653;1758;1864
F3YDH0	F3YDH0;P29844	F3YDH0;P29844	5;5	3;3	3;3	Heat shock 70 kDa protein cognate 3	Hsc70-3	;	2	5	3	3	9.3	5	5	72.26	656	656;656	0	16.782	6654100	6654100	3	3	31	138;231;253;342;542	True;False;True;True;False	152;250;273;367;588	199;329;358;491;817	362;672;673;727;1009;1757;1758;1759	362;673;727;1009;1758
M9PDQ0	M9PDQ0;M9PBI5;M9PGV6;P13395	M9PDQ0;M9PBI5;M9PGV6;P13395	4;4;4;4	4;4;4;4	4;4;4;4	Spectrin alpha chain	alpha-Spec	;;;	4	4	4	4	1.9	1.9	1.9	279.55	2425	2425;2447;2457;2415	0	25.967	8860100	8860100	4	4	32	70;235;304;575	True;True;True;True	72;255;327;621	90;336;429;861	150;682;886;1837	150;682;886;1837
M9PBL3	M9PBL3;P02828	M9PBL3;P02828	5;5	5;5	5;5	Heat shock protein 83	Hsp83	;	2	5	5	5	7.3	7.3	7.3	81.864	717	717;717	0	30.02	19968000	19968000	6	6	33	30;79;115;203;428	True;True;True;True;True	30;83;125;220;465	37;105;164;289;651	58;59;173;299;585;1418	59;173;299;585;1418
X2JFG0	X2JFG0;P05990	X2JFG0;P05990	10;10	10;10	10;10	CAD protein;Glutamine-dependent carbamoyl-phosphate synthase;Aspartate carbamoyltransferase;Dihydroorotase	r	;	2	10	10	10	4.8	4.8	4.8	246.67	2224	2224;2224	0	55.696	22445000	22445000	8	8	34	106;157;236;363;450;470;482;490;499;565	True;True;True;True;True;True;True;True;True;True	116;174;256;394;489;510;523;531;540;611	153;225;337;548;678;707;721;733;744;848	278;430;683;1226;1463;1523;1553;1574;1591;1818	278;430;683;1226;1463;1523;1553;1574;1591;1818
P06605	P06605;P06603;P06604	P06605;P06603	3;3;1	3;3;1	3;3;1	Tubulin alpha-3 chain;Tubulin alpha-1 chain	alphaTub84D;alphaTub84B	;	3	3	3	3	8.9	8.9	8.9	49.89	450	450;450;449	0	18.01	15675000	15675000	3	3	35	87;224;371	True;True;True	93;242;403	118;316;562	200;651;1251	200;651;1251
P13060	P13060	P13060	1	1	1	Elongation factor 2	EF2		1	1	1	1	1.1	1.1	1.1	94.458	844	844	0	7.6213	4239400	4239400	1	1	36	562	True	608	844	1812	1812
P15348	P15348	P15348	3	3	3	DNA topoisomerase 2	Top2		1	3	3	3	2.3	2.3	2.3	164.39	1447	1447	0	21.858	7085300	7085300	4	4	37	74;223;448	True;True;True	76;241;487	95;315;676	156;157;650;1458	156;650;1458
P28668	P28668	P28668	5	5	5	Bifunctional glutamate/proline--tRNA ligase;Glutamate--tRNA ligase;Proline--tRNA ligase	Aats-glupro		1	5	5	5	2.9	2.9	2.9	189.41	1714	1714	0	29.862	14026000	14026000	5	5	38	39;319;352;444;552	True;True;True;True;True	40;343;377;483;598	48;455;503;671;829	78;947;1028;1451;1779	78;947;1028;1451;1779
X2JC31	X2JC31;P29742	X2JC31;P29742	27;27	27;27	27;27	Clathrin heavy chain	Chc	;	2	27	27	27	17.8	17.8	17.8	191.18	1678	1678;1678	0	182.22	230400000	224050000	43	43	39	14;25;26;38;57;90;97;114;198;230;263;278;286;296;317;322;377;411;418;494;504;531;532;537;543;550;590	True;True;True;True;True;True;True;True;True;True;True;True;True;True;True;True;True;True;True;True;True;True;True;True;True;True;True	14;25;26;39;59;97;104;124;215;249;284;300;308;318;341;346;412;448;455;535;545;576;577;578;583;589;596;637	17;31;32;47;69;122;136;163;279;327;328;371;394;404;416;453;458;574;629;638;639;738;739;749;798;799;800;810;811;818;826;827;878	25;51;52;76;77;110;209;232;233;298;536;670;671;759;760;819;820;836;837;859;944;953;954;1268;1269;1381;1395;1396;1580;1581;1600;1691;1692;1693;1694;1695;1746;1747;1760;1761;1776;1777;1867	25;51;52;76;110;209;233;298;536;670;760;820;836;859;944;953;1268;1381;1395;1581;1600;1693;1695;1746;1761;1777;1867	42;43	95;181
P48159	P48159	P48159	1	1	1	60S ribosomal protein L23	RpL23		1	1	1	1	7.9	7.9	7.9	14.936	140	140	0	7.0285	1028900	1028900	1	1	40	373	True	405	564	1253	1253
P55828	P55828	P55828	2	2	2	40S ribosomal protein S20	RpS20		1	2	2	2	22.5	22.5	22.5	13.488	120	120	0	12.301	7264100	7264100	3	3	41	69;226	True;True	71;244	89;318	148;149;653	148;653
Q7KN97	Q7KN97;Q0E9E2	Q7KN97;Q0E9E2	37;37	37;37	37;37	Pyruvate carboxylase	PCB	;	2	37	37	37	34.3	34.3	34.3	130.86	1181	1181;1197	0	284.26	677280000	632280000	80	80	42	5;7;11;12;53;60;75;92;117;118;123;131;142;145;156;185;191;196;216;217;220;272;314;427;435;440;480;485;526;529;530;545;548;553;577;578;604	True;True;True;True;True;True;True;True;True;True;True;True;True;True;True;True;True;True;True;True;True;True;True;True;True;True;True;True;True;True;True;True;True;True;True;True;True	5;7;11;12;54;62;77;78;99;127;128;129;136;145;156;159;173;202;208;213;233;234;238;293;294;338;464;472;473;479;521;526;570;573;574;575;591;594;599;624;625;651	5;7;8;13;14;63;72;73;96;97;98;99;124;166;167;168;169;178;179;189;205;209;224;263;270;275;305;306;312;384;385;386;448;650;658;659;667;719;726;788;789;794;795;796;797;821;824;830;831;864;865;894	5;9;10;20;21;22;102;103;115;116;117;158;159;160;161;162;163;211;212;301;302;303;304;305;306;324;325;339;340;341;374;375;385;386;428;429;502;513;518;519;622;623;640;641;782;783;784;930;931;1416;1417;1428;1429;1443;1551;1560;1561;1674;1675;1676;1684;1685;1686;1687;1688;1689;1690;1765;1772;1773;1774;1780;1781;1782;1844;1845;1846;1847;1910;1911	5;10;20;22;102;115;161;211;302;306;324;340;375;385;429;502;513;519;622;623;640;784;930;1417;1428;1443;1551;1561;1675;1686;1687;1765;1772;1782;1844;1847;1911	44;45;46;47;48	212;357;569;746;1119
Q24560	Q24560;A1ZBL0;P61857;A0A0B4LGH1;P08841;Q9VAX7;Q8MST5;CON__ENSEMBL:ENSBTAP00000025008	Q24560;A1ZBL0;P61857;A0A0B4LGH1;P08841	8;7;6;4;4;3;3;3	8;7;6;4;4;3;3;3	8;7;6;4;4;3;3;3	Tubulin beta-1 chain;Tubulin beta-2 chain;Tubulin beta-3 chain	betaTub56D;betaTub85D;betaTub60D	;;;;	8	8	8	8	21.3	21.3	21.3	50.147	447	447;456;446;453;454;457;457;536	0	51.483	35002000	31724000	10	10	43	54;109;129;149;244;292;303;600	True;True;True;True;True;True;True;True	55;56;119;142;165;264;314;325;326;647	64;65;157;186;216;346;411;427;428;889	104;105;283;336;399;697;847;884;885;1895	105;283;336;399;697;847;884;1895	49;50;51	73;267;330
Q7KN75	Q7KN75	Q7KN75	12	12	12		Dp1		1	12	12	12	10	10	10	144.27	1301	1301	0	77.049	62623000	62623000	14	14	44	51;100;108;188;225;297;389;398;563;569;584;603	True;True;True;True;True;True;True;True;True;True;True;True	52;108;118;205;243;319;424;433;609;615;631;650	60;141;155;156;266;317;417;589;606;845;854;871;893	94;242;281;282;506;652;860;1292;1329;1813;1814;1828;1855;1909	94;242;282;506;652;860;1292;1329;1813;1828;1855;1909
Q8INM3	Q8INM3;Q9VGZ8	Q8INM3	13;4	13;4	13;4	Protein slender lobes	sle		2	13	13	13	11.3	11.3	11.3	158.65	1420	1420;674	0	83.133	117100000	117100000	19	19	45	29;110;161;237;312;327;337;405;473;481;509;544;551	True;True;True;True;True;True;True;True;True;True;True;True;True	29;120;178;257;336;351;362;440;513;522;550;590;597	35;36;158;230;338;339;446;464;477;616;710;720;757;819;820;828	55;56;57;284;285;439;684;685;928;965;992;1347;1527;1552;1618;1762;1763;1764;1778	56;284;439;685;928;965;992;1347;1527;1552;1618;1762;1778
Q8MSQ4	Q8MSQ4;Q9VE37	Q8MSQ4;Q9VE37	13;11	13;11	13;11		Mekk1	;	2	13	13	13	9	9	9	177.35	1571	1571;1478	0	84.648	86744000	84637000	21	21	46	71;105;130;293;300;313;318;379;454;474;495;510;580	True;True;True;True;True;True;True;True;True;True;True;True;True	73;115;143;144;315;322;337;342;414;493;514;536;551;627	91;92;152;187;188;412;420;421;447;454;576;684;711;740;758;867	151;152;153;276;277;337;338;848;864;865;929;945;946;1271;1475;1528;1529;1582;1583;1619;1850	152;277;337;848;864;929;945;1271;1475;1528;1583;1619;1850	52	439
Q9V3A7	Q9V3A7	Q9V3A7	2	2	2	Structural maintenance of chromosomes protein	glu		1	2	2	2	1.6	1.6	1.6	159.88	1409	1409	0	11.595	5288100	5288100	2	2	48	461;566	True;True	500;612	692;849	1491;1819	1491;1819
Q9V9A7	Q9V9A7	Q9V9A7	19	19	19	Probable methylcrotonoyl-CoA carboxylase beta chain, mitochondrial	l(2)04524		1	19	19	19	34.4	34.4	34.4	62.648	578	578	0	162.76	666560000	578090000	49	49	49	0;3;37;98;121;125;147;155;171;238;271;276;351;353;361;388;392;517;535	True;True;True;True;True;True;True;True;True;True;True;True;True;True;True;True;True;True;True	0;3;38;105;133;134;138;161;162;172;188;258;292;298;376;378;391;392;423;427;558;581	0;3;46;137;175;176;181;212;213;223;245;340;383;391;501;502;504;521;522;586;587;588;594;767;768;769;808	0;3;74;75;234;317;318;319;320;321;330;392;393;394;395;426;427;462;463;686;687;688;781;814;1024;1025;1026;1027;1029;1030;1065;1066;1067;1068;1287;1288;1289;1290;1291;1305;1306;1307;1308;1309;1637;1638;1639;1640;1741;1742	0;3;75;234;320;330;394;426;463;687;781;814;1026;1029;1067;1289;1307;1638;1742	53;54;55	48;440;479
Q9VN25	Q9VN25	Q9VN25	3	3	3	Eukaryotic translation initiation factor 3 subunit A	eIF3-S10		1	3	3	3	3	3	3	133.88	1140	1140	0	17.593	4482500	4482500	3	3	53	22;141;291	True;True;True	22;155;313	28;204;410	44;373;846	44;373;846
Q9W0B8	Q9W0B8	Q9W0B8	2	2	2	Coatomer subunit alpha	alphaCOP		1	2	2	2	1.7	1.7	1.7	139.33	1234	1234	0	11.667	3525800	3525800	2	2	55	471;500	True;True	511;541	708;745	1524;1592	1524;1592
Q9W2L2	Q9W2L2	Q9W2L2	4	4	4		Magi		1	4	4	4	5.3	5.3	5.3	130.56	1202	1202	0	25.564	11245000	11245000	3	3	57	257;425;512;581	True;True;True;True	278;462;553;628	365;648;761;868	744;1414;1623;1851	744;1414;1623;1851
LC-MS analysis of boiling eluted proteins
Leading Protein	Protein IDs	Majority protein IDs	Peptide counts (all)	Peptide counts (razor+unique)	Peptide counts (unique)	Protein names	Gene names	Fasta headers	Number of proteins	Peptides	Razor + unique peptides	Unique peptides	Sequence coverage [%]	Unique + razor sequence coverage [%]	Unique sequence coverage [%]	Mol. weight [kDa]	Sequence length	Sequence lengths	Q-value	Score	Intensity	LFQ intensity	MS/MS count	MS/MS count	id	Peptide IDs	Peptide is razor	Mod. peptide IDs	Evidence IDs	MS/MS IDs	Best MS/MS	Oxidation (M) site IDs	Oxidation (M) site positions
Q9VEZ3	Q9VEZ3;E1JIM4;A0A0B4K664;A0A0B4K700	Q9VEZ3;E1JIM4;A0A0B4K664;A0A0B4K700	2;2;2;2	2;2;2;2	2;2;2;2		msps	;;;	4	2	2	2	0.9	0.9	0.9	225.98	2042	2042;2050;2074;2082	0	12.872	6698300	6698300	2	2	0	287;378	True;True	306;407	387;540	745;1061	745;1061
Q95RL2	Q95RL2;Q5U156;A0A0B4KER0	Q95RL2;Q5U156;A0A0B4KER0	1;1;1	1;1;1	1;1;1		row	;;	3	1	1	1	1.7	1.7	1.7	67.032	602	602;1281;1301	0	6.2788	4009300	4009300	1	1	1	517	True	555	724	1388	1388
A0A0B4KF46	A0A0B4KF46;Q8T0L3	A0A0B4KF46;Q8T0L3	1;1	1;1	1;1		Uba1	;	2	1	1	1	1.4	1.4	1.4	111.77	1008	1008;1191	0	5.9315	2084800	2084800	1	1	2	521	True	559	728	1394	1394
A0A0B4KF92	A0A0B4KF92;A0A0B4LGS6;Q9VNC3;A0A0B4LGM5	A0A0B4KF92;A0A0B4LGS6;Q9VNC3;A0A0B4LGM5	4;4;4;4	4;4;4;4	4;4;4;4		Hcs	;;;	4	4	4	4	4.3	4.3	4.3	110.35	993	993;999;1041;1047	0	24.438	11267000	11267000	3	3	3	2;257;513;514	True;True;True;True	2;273;550;551	2;342;719;720	3;650;1379;1380	3;650;1379;1380
A0A0B4KFZ9	A0A0B4KFZ9;P84040	A0A0B4KFZ9;P84040	2;2	2;2	2;2	Histone H4	His4r;His4	;	2	2	2	2	19.4	19.4	19.4	11.381	103	103;103	0	10.941	6384400	6384400	2	2	4	68;485	True;True	71;522	87;685	138;1320	138;1320
A0A0B4KI71	A0A0B4KI71;Q8IMF5;P23226	A0A0B4KI71;Q8IMF5;P23226	3;3;3	3;3;3	3;3;3	205 kDa microtubule-associated protein	Map205	;;	3	3	3	3	4.5	4.5	4.5	118.15	1109	1109;1185;1185	0	20.136	11921000	11921000	3	3	5	361;437;458	True;True;True	389;470;492	520;622;649	1030;1206;1257	1030;1206;1257
A0A0B4LFD2	A0A0B4LFD2;P29845	A0A0B4LFD2;P29845	2;2	2;2	2;2	Heat shock 70 kDa protein cognate 5	Hsc70-5	;	2	2	2	2	3.5	3.5	3.5	74.065	686	686;686	0	13.328	2464500	2464500	2	2	6	314;491	True;True	336;528	442;691	881;1333	881;1333
A0A0B4LFW6	A0A0B4LFW6;A1Z7S0	A0A0B4LFW6;A1Z7S0	3;3	3;3	3;3		Rme-8	;	2	3	3	3	1.6	1.6	1.6	272.47	2407	2407;2408	0	18.407	7527500	7527500	3	3	7	191;329;404	True;True;True	203;354;436	250;468;576	470;925;1127	470;925;1127
A0A0B4LFZ4	A0A0B4LFZ4;Q7KN62	A0A0B4LFZ4;Q7KN62	1;1	1;1	1;1	Transitional endoplasmic reticulum ATPase TER94	TER94	;	2	1	1	1	1.5	1.5	1.5	91.923	825	825;801	0	6.3502	2375800	2375800	0	0	8	99	True	108	134	218	218
X2JCP8	X2JCP8;M9PFZ6;A0A0B4LH50;P83967;P53501;P10987;P10981;P02574;P02572	X2JCP8;M9PFZ6;A0A0B4LH50;P83967;P53501;P10987;P10981;P02574;P02572	2;2;2;2;2;2;2;2;2	2;2;2;2;2;2;2;2;2	2;2;2;2;2;2;2;2;2	Actin, indirect flight muscle;Actin-57B;Actin-5C;Actin-87E;Actin, larval muscle;Actin-42A	Act5C;Act79B;Act87E;Act88F;Act57B;Act42A	;;;;;;;;	9	2	2	2	5.3	5.3	5.3	41.821	376	376;376;376;376;376;376;376;376;376	0	12.683	8934800	8934800	2	2	9	10;177	True;True	10;189	12;228	21;388	21;388
A1Z784	A1Z784;Q7JV23;A8DY67	A1Z784;Q7JV23;A8DY67	108;103;102	108;103;102	108;103;102		ACC	;;	3	108	108	108	38.4	38.4	38.4	278.59	2482	2482;2323;2348	0	323.31	30399000000	29124000000	513	513	10	3;5;15;16;27;28;29;32;39;43;52;54;55;58;59;61;67;72;73;81;83;85;88;96;105;106;112;114;116;127;134;146;151;152;154;162;167;168;169;181;182;183;185;187;192;196;198;201;205;210;231;232;233;234;235;238;240;243;245;247;250;253;260;261;264;269;277;278;282;285;286;291;306;309;310;336;339;344;348;352;353;354;358;359;360;365;368;369;375;382;413;429;436;439;451;454;467;469;481;497;500;502;503;508;524;537;5…	True;True;True;True;True;True;True;True;True;True;True;True;True;True;True;True;True;True;True;True;True;True;True;True;True;True;True;True;True;True;True;True;True;True;True;True;True;True;True;True;True;True;True;True;True;True;True;True;True;True;True;True;True;True;True;True;True;True;True;True;True;True;True;True;True;True;True;True;True;True;True;True;True;True;True;True;True;True;True;True…	3;5;15;16;27;28;29;30;33;40;44;53;55;56;59;60;62;69;70;75;76;88;90;92;95;104;105;114;115;122;125;127;138;145;158;163;164;166;174;179;180;181;193;194;195;197;199;204;208;210;213;214;218;223;224;246;247;248;249;250;254;256;259;261;263;266;269;277;278;281;286;287;295;296;300;303;304;305;310;326;330;331;361;362;365;370;374;379;380;381;382;386;387;388;393;396;397;398;404;412;413;445;462;469;472;473;48…	3;6;18;19;20;21;32;33;34;35;36;37;38;41;49;53;64;66;67;68;71;72;73;74;77;85;86;91;92;93;105;106;108;109;111;114;125;126;127;128;129;130;131;141;142;143;144;145;152;153;156;158;169;177;178;193;199;200;202;212;217;218;219;220;233;234;235;236;237;238;239;240;241;243;245;246;251;252;257;259;263;264;265;266;270;276;277;278;308;309;310;311;312;313;314;318;320;323;324;325;327;328;330;333;337;347;348;349…	4;9;10;28;29;30;31;32;33;34;52;53;54;55;56;57;58;59;60;61;62;63;68;80;81;86;87;88;102;103;104;105;107;108;109;110;111;112;115;116;117;118;119;120;121;125;126;135;136;137;144;145;146;147;148;149;150;151;165;166;167;168;169;170;171;173;174;175;176;177;179;182;201;202;203;204;205;206;207;208;209;210;211;212;213;214;215;225;226;227;228;229;230;231;232;233;234;247;248;249;256;258;259;260;274;275;276;2…	4;9;30;32;55;59;61;68;80;87;103;111;112;117;120;126;135;144;150;166;175;179;182;212;226;232;248;256;258;275;289;326;340;342;347;359;368;378;380;404;421;442;455;458;472;485;488;505;509;520;572;574;580;584;586;592;597;606;615;618;630;643;658;666;679;694;715;721;728;734;742;749;786;794;796;934;943;965;978;989;1000;1008;1017;1023;1028;1040;1045;1050;1056;1073;1147;1188;1204;1210;1235;1247;1275;1287;1…	0;1;2;3;4;5;6;7;8;9;10;11;12;13;14;15;16;17;18;19;20	286;298;379;446;486;541;834;902;1058;1157;1516;1779;1790;2057;2095;2128;2184;2187;2236;2329;2470
Q7JYK1	Q7JYK1;Q9W418;A4V1F9;P18101;P15357;P0CG69;R9PY16	Q7JYK1;Q9W418;A4V1F9;P18101;P15357;P0CG69;R9PY16	3;3;3;3;3;3;2	3;3;3;3;3;3;2	3;3;3;3;3;3;2	Ubiquitin-60S ribosomal protein L40;Ubiquitin;60S ribosomal protein L40;Ubiquitin-40S ribosomal protein S27a;Ubiquitin;40S ribosomal protein S27a;Polyubiquitin;Ubiquitin	RpL40;Ubi-p5E;Ubi-p63E;RpS27A	;;;;;;	7	3	3	3	24.2	24.2	24.2	14.729	128	128;534;763;128;156;763;301	0	20.027	38510000	38510000	4	4	13	121;227;444	True;True;True	132;242;478	163;302;630	266;558;559;1221	266;559;1221
A4V391	A4V391;P12613	A4V391;P12613	3;3	3;3	3;3	T-complex protein 1 subunit alpha	T-cp1	;	2	3	3	3	6.5	6.5	6.5	59.556	557	557;557	0	18.065	4411600	4411600	3	3	14	53;414;539	True;True;True	54;446;577	65;589;747	106;1154;1425	106;1154;1425
A4V3Q6	A4V3Q6;P05303;P08736	A4V3Q6;P05303;P08736	1;1;1	1;1;1	1;1;1	Elongation factor 1-alpha;Elongation factor 1-alpha 2;Elongation factor 1-alpha 1	Ef1alpha100E;Ef1alpha48D	;;	3	1	1	1	2.2	2.2	2.2	50.662	462	462;462;463	0	7.1823	10183000	10183000	2	2	15	419	True	452	596;597	1167;1168	1167
O61380	O61380;A8DZ29	O61380;A8DZ29	6;6	6;6	6;6		eIF4G	;	2	6	6	6	4.4	4.4	4.4	183.94	1666	1666;1919	0	35.463	16759000	16759000	6	6	16	13;35;125;372;402;511	True;True;True;True;True;True	13;36;136;401;434;548	16;44;167;534;574;717	26;73;271;1053;1125;1376	26;73;271;1053;1125;1376	21	669
C7LA75	C7LA75;P11147	C7LA75;P11147	16;16	16;16	12;12	Heat shock 70 kDa protein cognate 4	Hsc70-4-RA;Hsc70-4	;	2	16	16	12	29.3	29.3	20.9	71.131	651	651;651	0	131.17	266480000	261720000	31	31	18	38;42;50;133;189;202;214;299;308;331;332;412;421;463;482;526	True;True;True;True;True;True;True;True;True;True;True;True;True;True;True;True	39;43;51;144;201;215;228;318;328;329;356;357;444;454;498;519;564	47;48;52;62;176;248;267;284;285;406;407;418;419;470;471;586;587;599;600;655;682;733;734	77;78;79;85;100;284;465;506;532;533;534;769;770;771;788;789;927;928;1143;1144;1145;1170;1171;1172;1173;1264;1314;1315;1316;1402;1403	77;85;100;284;465;506;533;771;788;927;928;1145;1172;1264;1315;1402	22;23	61;127
C9QP42	C9QP42;Q02748	C9QP42;Q02748	2;2	2;2	2;2	Eukaryotic initiation factor 4A	eIF-4a	;	2	2	2	2	4.5	4.5	4.5	45.878	403	403;403	0	11.311	6319500	6319500	2	2	19	104;501	True;True	113;538	140;706	224;1360	224;1360
F3YDH0	F3YDH0;P29844	F3YDH0;P29844	11;11	8;8	8;8	Heat shock 70 kDa protein cognate 3	Hsc70-3	;	2	11	8	8	21	15.1	15.1	72.26	656	656;656	0	49.33	33470000	33470000	8	8	35	57;64;76;214;236;239;308;315;330;333;482	True;True;True;False;True;True;False;True;True;True;False	58;65;81;228;251;255;328;329;337;355;358;519	70;80;98;284;285;315;319;418;419;443;469;472;682	114;129;156;532;533;534;587;595;788;789;882;926;929;1314;1315;1316	114;129;156;533;587;595;788;882;926;929;1315	22	153
M9PDQ0	M9PDQ0;M9PBI5;M9PGV6;P13395	M9PDQ0;M9PBI5;M9PGV6;P13395	4;4;4;4	4;4;4;4	4;4;4;4	Spectrin alpha chain	alpha-Spec	;;;	4	4	4	4	1.9	1.9	1.9	279.55	2425	2425;2447;2457;2415	0	26.196	10796000	10796000	4	4	37	62;219;267;280	True;True;True;True	63;234;284;298	78;293;357;378	127;547;685;726	127;547;685;726
M9PBL3	M9PBL3;P02828	M9PBL3;P02828	16;16	16;16	16;16	Heat shock protein 83	Hsp83	;	2	16	16	16	24.4	24.4	24.4	81.864	717	717;717	0	119.82	122610000	122610000	18	18	38	6;25;70;84;95;108;109;174;186;188;265;346;364;374;397;427	True;True;True;True;True;True;True;True;True;True;True;True;True;True;True;True	6;25;73;91;103;117;118;186;198;200;282;372;392;403;428;460	7;30;89;110;124;147;148;225;244;247;355;492;524;525;536;566;608	11;49;142;178;200;239;240;241;385;456;464;682;967;1035;1036;1055;1109;1186	11;49;142;178;200;240;241;385;456;464;682;967;1036;1055;1109;1186	38	86
M9PF16	M9PF16;Q00963;M9PHG4	M9PF16;Q00963;M9PHG4	6;6;5	6;6;5	6;6;5	Spectrin beta chain	beta-Spec	;;	3	6	6	6	3	3	3	267.62	2308	2308;2291;2147	0	36.108	18855000	18855000	5	5	39	49;161;184;272;428;475	True;True;True;True;True;True	50;173;196;290;461;512	61;211;242;368;609;674	99;358;454;707;1187;1300	99;358;454;707;1187;1300
X2JFG0	X2JFG0;P05990	X2JFG0;P05990	11;11	11;11	11;11	CAD protein;Glutamine-dependent carbamoyl-phosphate synthase;Aspartate carbamoyltransferase;Dihydroorotase	r	;	2	11	11	11	5.7	5.7	5.7	246.67	2224	2224;2224	0	71.502	34355000	34355000	10	10	40	71;100;117;164;194;220;389;409;440;461;499	True;True;True;True;True;True;True;True;True;True;True	74;109;128;176;206;235;420;441;474;496;536	90;135;159;214;255;294;555;583;626;653;704	143;219;261;362;482;548;549;1087;1139;1212;1261;1356	143;219;261;362;482;549;1087;1139;1212;1261;1356
P06605	P06605;P06603;P06604	P06605;P06603;P06604	6;6;3	6;6;3	6;6;3	Tubulin alpha-3 chain;Tubulin alpha-1 chain;Tubulin alpha-2 chain	alphaTub84D;alphaTub84B;alphaTub85E	;;	3	6	6	6	14.2	14.2	14.2	49.89	450	450;450;449	0	39.367	77038000	77038000	12	12	41	77;101;132;207;297;323	True;True;True;True;True;True	82;110;143;220;316;346	99;136;175;272;404;456;457	157;158;220;283;512;513;514;515;767;906;907;908	158;220;283;514;767;907	39	398
P13060	P13060	P13060	3	3	3	Elongation factor 2	EF2		1	3	3	3	3.3	3.3	3.3	94.458	844	844	0	18.084	13407000	13407000	3	3	42	86;415;530	True;True;True	93;447;568	112;590;738	180;1155;1408	180;1155;1408
P15348	P15348	P15348	1	1	1	DNA topoisomerase 2	Top2		1	1	1	1	0.7	0.7	0.7	164.39	1447	1447	0	6.1039	754130	754130	1	1	43	206	True	219	271	511	511
P28668	P28668	P28668	5	5	5	Bifunctional glutamate/proline--tRNA ligase;Glutamate--tRNA ligase;Proline--tRNA ligase	Aats-glupro		1	5	5	5	2.8	2.8	2.8	189.41	1714	1714	0	28.911	18272000	18272000	6	6	44	34;87;279;302;490	True;True;True;True;True	35;94;297;321;527	43;113;377;411;690	72;181;725;780;1331;1332	72;181;725;780;1332
X2JC31	X2JC31;P29742	X2JC31;P29742	11;11	11;11	11;11	Clathrin heavy chain	Chc	;	2	11	11	11	7.5	7.5	7.5	191.18	1678	1678;1678	0	78.213	74487000	71105000	16	16	45	80;242;262;281;328;355;435;473;478;488;529	True;True;True;True;True;True;True;True;True;True;True	87;258;279;299;353;383;468;509;510;515;525;567	104;322;350;379;467;512;619;620;670;671;677;678;688;737	164;602;603;670;727;923;924;1011;1202;1203;1294;1295;1305;1306;1329;1407	164;603;670;727;923;1011;1203;1294;1305;1329;1407	40	181
P34739	P34739	P34739	2	2	2	Transcription termination factor 2	lds		1	2	2	2	1.9	1.9	1.9	118.37	1061	1061	0	11.536	3642200	3642200	2	2	46	213;510	True;True	227;547	283;716	531;1375	531;1375
P35381	P35381	P35381	3	3	3	ATP synthase subunit alpha, mitochondrial	blw		1	3	3	3	6.5	6.5	6.5	59.421	552	552	0	17.903	8126300	8126300	3	3	47	82;371;518	True;True;True	89;400;556	107;533;725	172;1052;1389	172;1052;1389
P45437	P45437	P45437	2	2	2	Coatomer subunit beta	betaCop		1	2	2	2	2	2	2	107.41	964	964	0	11.205	6681300	6681300	2	2	48	494;528	True;True	531;566	695;736	1338;1406	1338;1406
P48159	P48159	P48159	1	1	1	60S ribosomal protein L23	RpL23		1	1	1	1	7.9	7.9	7.9	14.936	140	140	0	5.977	2295100	2295100	2	2	49	325	True	348	459;460	910;911	910
P48604	P48604	P48604	2	2	2	GrpE protein homolog, mitochondrial	Roe1		1	2	2	2	9.9	9.9	9.9	23.926	213	213	0	11.135	4429600	4429600	0	0	50	203;466	True;True	216;501	268;659	507;1271	507;1271
P55828	P55828	P55828	2	2	2	40S ribosomal protein S20	RpS20		1	2	2	2	22.5	22.5	22.5	13.488	120	120	0	12.597	17221000	17221000	5	5	51	60;209	True;True	61;222	75;76;274;275	122;123;124;517;518	123;517
Q7KN97	Q7KN97;Q0E9E2	Q7KN97;Q0E9E2	32;32	32;32	32;32	Pyruvate carboxylase	PCB	;	2	32	32	32	29.6	29.6	29.6	130.86	1181	1181;1197	0	239.15	490880000	479290000	58	58	52	8;11;44;51;66;110;111;115;124;135;136;139;150;175;180;199;204;249;276;379;383;420;423;445;468;472;484;487;492;516;519;546	True;True;True;True;True;True;True;True;True;True;True;True;True;True;True;True;True;True;True;True;True;True;True;True;True;True;True;True;True;True;True;True	8;11;45;52;67;68;119;120;121;126;135;146;147;150;162;187;192;211;217;265;294;408;409;414;453;456;479;504;508;521;524;529;554;557;585	9;13;14;54;55;63;82;83;84;149;150;151;157;166;179;180;184;198;226;232;260;261;269;332;372;541;542;547;598;603;631;665;669;684;687;692;693;723;726;755	15;16;22;23;24;89;90;101;131;132;133;134;242;243;244;245;246;257;270;293;294;295;296;297;305;339;386;393;490;491;508;621;713;714;1062;1063;1075;1169;1176;1177;1222;1286;1292;1293;1319;1326;1327;1328;1334;1335;1336;1386;1387;1390;1391;1392;1442;1443	16;24;90;101;132;243;246;257;270;295;297;305;339;386;393;491;508;621;714;1062;1075;1169;1176;1222;1286;1293;1319;1327;1336;1386;1391;1443	41;42;43;44;45	357;569;746;857;1119
Q24560	Q24560;A1ZBL0;P61857;A0A0B4LGH1;P08841;Q9VAX7;Q8MST5;CON__ENSEMBL:ENSBTAP00000025008	Q24560;A1ZBL0;P61857	9;8;6;4;4;3;3;3	9;8;6;4;4;3;3;3	9;8;6;4;4;3;3;3	Tubulin beta-1 chain;Tubulin beta-2 chain	betaTub56D;betaTub85D	;;	8	9	9	9	24.2	24.2	24.2	50.147	447	447;456;446;453;454;457;457;536	0	87.801	147320000	137500000	21	21	53	26;45;102;123;143;225;228;259;430	True;True;True;True;True;True;True;True;True	26;46;111;134;155;240;243;275;276;463	31;56;137;165;190;299;303;304;345;346;612;613	50;51;91;221;269;318;319;320;321;555;560;561;562;654;655;656;657;1192;1193;1194;1195;1196	51;91;221;269;319;555;560;655;1194	46;47;48;49	73;257;293;330
X2JB48	X2JB48;Q26365	X2JB48;Q26365	3;3	3;3	3;3	ADP,ATP carrier protein	sesB	;	2	3	3	3	9.4	9.4	9.4	32.909	299	299;312	0	19.151	15057000	15057000	3	3	54	91;148;373	True;True;True	98;160;402	118;195;535	186;333;1054	186;333;1054
Q7KN75	Q7KN75	Q7KN75	7	7	7		Dp1		1	7	7	7	6.4	6.4	6.4	144.27	1301	1301	0	50.463	32121000	32121000	8	8	55	93;208;215;221;509;522;545	True;True;True;True;True;True;True	100;221;229;236;546;560;584	121;273;286;295;715;729;754	191;516;535;550;1373;1374;1395;1441	191;516;535;550;1373;1395;1441	50	163
Q8IPF5	Q8IPF5;Q9VLL3;Q86BM5	Q8IPF5;Q9VLL3;Q86BM5	1;1;1	1;1;1	1;1;1		Akap200	;;	3	1	1	1	6.2	6.2	6.2	38.168	372	372;753;837	0	6.3405	6698000	6698000	1	1	56	370	True	399	532	1051	1051
Q8INM3	Q8INM3;Q9VGZ8	Q8INM3	9;2	9;2	9;2	Protein slender lobes	sle		2	9	9	9	8	8	8	158.65	1420	1420;674	0	69.906	54966000	54966000	13	13	57	24;103;222;275;284;294;448;483;489	True;True;True;True;True;True;True;True;True	24;112;237;293;302;313;482;520;526	29;138;139;296;371;382;395;635;683;689	47;48;222;223;551;711;712;733;756;1230;1317;1318;1330	48;223;551;712;733;756;1230;1318;1330
Q8MSQ4	Q8MSQ4;Q9VE37	Q8MSQ4;Q9VE37	6;4	6;4	6;4		Mekk1	;	2	6	6	6	4.5	4.5	4.5	177.35	1571	1571;1478	0	34.114	27336000	27336000	5	5	58	63;97;118;334;411;450	True;True;True;True;True;True	64;106;129;359;443;484	79;132;160;473;585;637	128;216;262;930;1142;1232	128;216;262;930;1142;1232
Q8MSW0	Q8MSW0	Q8MSW0	2	2	2		Aats-ile		1	2	2	2	1.9	1.9	1.9	141.1	1229	1229	0	11.807	4019300	4019300	1	1	59	304;408	True;True	323;440	413;582	783;1138	783;1138
Q8T0J3	Q8T0J3;Q9V4P1	Q8T0J3;Q9V4P1	1;1	1;1	1;1	Actin-binding protein anillin	scra	;	2	1	1	1	2.4	2.4	2.4	66.296	616	616;1239	0	6.6133	3033900	3033900	1	1	60	471	True	507	668	1291	1291
Q99323	Q99323;Q59E58;A0A0B4JD57;Q59E59;A0A0B4K7Q4;A0A0B4JD95	Q99323;Q59E58;A0A0B4JD57;Q59E59;A0A0B4K7Q4;A0A0B4JD95	13;12;12;12;12;11	13;12;12;12;12;11	13;12;12;12;12;11	Myosin heavy chain, non-muscle	zip	;;;;;	6	13	13	13	7.3	7.3	7.3	236.64	2057	2057;1971;1979;2016;2024;1964	0	82.644	44734000	44734000	14	14	61	12;17;18;22;65;173;226;255;289;307;327;367;434	True;True;True;True;True;True;True;True;True;True;True;True;True	12;17;18;22;66;185;241;271;308;327;352;395;467	15;22;23;27;81;224;300;301;340;389;417;466;528;618	25;35;36;37;45;130;384;556;557;647;747;787;922;1044;1201	25;36;37;45;130;384;556;647;747;787;922;1044;1201	51;52	834;1165
Q9V3A7	Q9V3A7	Q9V3A7	3	3	3	Structural maintenance of chromosomes protein	glu		1	3	3	3	2.3	2.3	2.3	159.88	1409	1409	0	16.58	8395900	8395900	3	3	62	98;224;505	True;True;True	107;239;542	133;298;711	217;554;1368	217;554;1368
Q9V9A7	Q9V9A7	Q9V9A7	21	21	21	Probable methylcrotonoyl-CoA carboxylase beta chain, mitochondrial	l(2)04524		1	21	21	21	37.4	37.4	37.4	62.648	578	578	0	286.82	1616300000	1472000000	66	66	63	0;4;33;89;90;113;119;141;149;160;223;248;301;303;312;316;337;340;342;456;476	True;True;True;True;True;True;True;True;True;True;True;True;True;True;True;True;True;True;True;True;True	0;4;34;96;97;123;124;130;152;153;161;172;238;264;320;322;333;334;338;363;366;368;490;513	0;4;5;42;115;116;117;154;155;161;187;188;196;197;210;297;331;409;410;412;425;426;427;444;477;478;482;484;645;646;647;675	0;1;5;6;7;8;69;70;71;183;184;185;250;251;252;253;254;255;263;264;312;313;314;315;316;334;335;336;337;338;356;357;552;553;619;620;776;777;778;779;781;782;801;802;803;804;805;806;807;883;935;936;937;938;945;946;947;948;949;950;953;1250;1251;1252;1253;1254;1301	0;6;70;183;184;254;263;312;335;357;552;620;777;782;802;883;936;948;953;1251;1301	53;54;55	48;440;479
Q9VP57	Q9VP57	Q9VP57	2	2	2		pzg		1	2	2	2	3.2	3.2	3.2	105.08	996	996	0	11.419	4873900	4873900	2	2	68	195;393	True;True	207;424	256;561	483;1098	483;1098

## Sheet: UAS-Met-BirA +JH
LC-MS analysis of competitive eluted proteins
Leading Protein	Protein IDs	Majority protein IDs	Peptide counts (all)	Peptide counts (razor+unique)	Peptide counts (unique)	Protein names	Gene names	Fasta headers	Number of proteins	Peptides	Razor + unique peptides	Unique peptides	Sequence coverage [%]	Unique + razor sequence coverage [%]	Unique sequence coverage [%]	Mol. weight [kDa]	Sequence length	Sequence lengths	Q-value	Score	Intensity	LFQ intensity	MS/MS count	MS/MS count	id	Peptide IDs	Peptide is razor	Mod. peptide IDs	Evidence IDs	MS/MS IDs	Best MS/MS	Oxidation (M) site IDs	Oxidation (M) site positions
A0A023GQA5	A0A023GQA5;P24156	A0A023GQA5;P24156	3;3	3;3	3;3	Protein l(2)37Cc	l(2)37Cc	;	2	3	3	3	13.4	13.4	13.4	30.383	276	276;276	0	30.415	5469100	5469100	3	3	0	213;236;382	True;True;True	223;247;399	251;277;458	394;435;743	394;435;743
A0A0B4JD11	A0A0B4JD11;Q9NJH0	A0A0B4JD11;Q9NJH0	4;4	4;4	4;4	Elongation factor 1-gamma	Ef1gamma	;	2	4	4	4	10.2	10.2	10.2	48.967	431	431;431	0	30.571	29282000	29282000	6	6	1	30;173;283;507	True;True;True;True	30;181;294;526	32;198;332;617	45;46;309;525;526;1052	46;309;525;1052
A0A0B4K6Y8	A0A0B4K6Y8;A0A0B4KG68;A0A0B4K661;Q6NN28;A0A0B4KG06;Q95TA3;Q8IG84;Q8IGY1;P06754;P49455	A0A0B4K6Y8;A0A0B4KG68;A0A0B4K661;Q6NN28;A0A0B4KG06;Q95TA3;Q8IG84;Q8IGY1;P06754;P49455	1;1;1;1;1;1;1;1;1;1	1;1;1;1;1;1;1;1;1;1	1;1;1;1;1;1;1;1;1;1	Tropomyosin-1, isoforms 9A/A/B;Tropomyosin-1, isoforms 33/34	Tm1	;;;;;;;;;	10	1	1	1	6.2	6.2	6.2	18.359	161	161;250;250;285;285;441;678;711;339;518	0.010204	6.2749	1885900	1885900	1	1	2	223	True	234	262	411	411
A0A0B4K6U6	A0A0B4K6U6;Q08473	A0A0B4K6U6;Q08473	1;1	1;1	1;1	RNA-binding protein squid	sqd	;	2	1	1	1	3.2	3.2	3.2	33.054	308	308;344	0	7.2118	4150500	4150500	1	1	3	518	True	537	630	1079	1079
A1ZB78	A1ZB78;A1ZB77;Q7JRI6;A1ZB79;A1ZB80;E1JGL5;A0A0B4K7G1;A1ZB83;A0A0B4LGX1;A0A0B4K897	A1ZB78;A1ZB77;Q7JRI6;A1ZB79;A1ZB80;E1JGL5;A0A0B4K7G1;A1ZB83;A0A0B4LGX1;A0A0B4K897	1;1;1;1;1;1;1;1;1;1	1;1;1;1;1;1;1;1;1;1	1;1;1;1;1;1;1;1;1;1		CG5174-RA	;;;;;;;;;	10	1	1	1	5.4	5.4	5.4	18.273	166	166;186;188;202;208;209;222;355;365;369	0.009434	5.9628	0	0	1	1	4	471	True	489	580	990	990
A0A0B4K7G4	A0A0B4K7G4;P13469	A0A0B4K7G4;P13469	3;3	3;3	3;3	DNA-binding protein modulo	mod	;	2	3	3	3	7.6	7.6	7.6	60.309	542	542;542	0	20.586	10281000	10281000	4	4	5	34;459;463	True;True;True	34;477;481	37;559;564	53;54;914;923	53;914;923
A0A0B4K8A5	A0A0B4K8A5;Q9W2F2	A0A0B4K8A5;Q9W2F2	1;1	1;1	1;1	Protein mahjong	mahj	;	2	1	1	1	0.7	0.7	0.7	172.08	1544	1544;1544	0.010989	6.3597	7084200	7084200	1	1	6	276	True	287	324	503	503
A0A0B4KEH0	A0A0B4KEH0;P29310	A0A0B4KEH0;P29310	4;4	4;4	3;3	14-3-3 protein zeta	14-3-3zeta	;	2	4	4	3	17.7	17.7	14.5	28.227	248	248;248	0	39.861	163330000	163330000	5	5	7	328;416;420;525	True;True;True;True	342;433;437;544	393;499;504;637	636;817;818;826;1087	636;818;826;1087
A0A0B4KGE6	A0A0B4KGE6;A0A0B4KFH4;P26270	A0A0B4KGE6;A0A0B4KFH4;P26270	1;1;1	1;1;1	1;1;1	26S proteasome non-ATPase regulatory subunit 7	Rpn8	;;	3	1	1	1	3	3	3	38.089	338	338;358;338	0.010101	6.2644	0	0	1	1	8	501	True	520	611	1044	1044
A0A0B4KFZ9	A0A0B4KFZ9;P84040	A0A0B4KFZ9;P84040	4;4	4;4	4;4	Histone H4	His4r;His4	;	2	4	4	4	38.8	38.8	38.8	11.381	103	103;103	0	35.653	30919000	30919000	8	8	9	64;69;228;478	True;True;True;True	65;71;239;496	71;79;80;269;587	104;114;115;116;424;425;1000;1001	104;115;425;1001
A0A0B4KGP8	A0A0B4KGP8;Q24208;P45975	A0A0B4KGP8;Q24208;P45975	1;1;1	1;1;1	1;1;1	Eukaryotic translation initiation factor 2 subunit 3;Histone-lysine N-methyltransferase Su(var)3-9	eIF-2gamma;Su(var)3-9	;;	3	1	1	1	2.3	2.3	2.3	51.484	475	475;475;635	0	7.0796	2638400	2638400	1	1	10	44	True	44	48	70	70
Q4AB57	Q4AB57;A0A0B4KH25;P84051;P08985	Q4AB57;A0A0B4KH25;P84051;P08985	2;2;2;2	2;2;2;2	2;2;2;2	Histone H2A;Histone H2A.v	His2A:CG33859;His2Av;His2A	;;;	4	2	2	2	12.9	12.9	12.9	13.364	124	124;141;124;141	0	13.952	19003000	19003000	3	3	11	17;183	True;True	17;191	18;210	25;26;327	25;327
A0A0B4KH34	A0A0B4KH34;P22464	A0A0B4KH34;P22464	2;2	2;2	2;2	Annexin;Annexin B9	AnxB9	;	2	2	2	2	6.2	6.2	6.2	35.944	324	324;324	0	11.641	4775300	4775300	2	2	12	23;435	True;True	23;452	24;528	32;866	32;866
A0A0B4KI24	A0A0B4KI24;Q27415	A0A0B4KI24;Q27415	2;2	2;2	2;2	Nucleoplasmin-like protein	Nlp	;	2	2	2	2	15.1	15.1	15.1	16.996	152	152;152	0	13.083	6575100	6575100	2	2	13	52;72	True;True	53;74	59;83	88;120	88;120
A0A0B4LEY6	A0A0B4LEY6;Q94518	A0A0B4LEY6;Q94518	1;1	1;1	1;1	Nascent polypeptide-associated complex subunit alpha	Nacalpha	;	2	1	1	1	6.9	6.9	6.9	23.021	217	217;217	0	9.8125	6264600	6264600	2	2	14	192	True	200	219	342;343	342
A0A0B4LFB3	A0A0B4LFB3;Q7JVI3	A0A0B4LFB3;Q7JVI3	1;1	1;1	1;1	Eukaryotic translation initiation factor 3 subunit M	Tango7	;	2	1	1	1	2.6	2.6	2.6	44.086	387	387;387	0.0097087	6.0926	0	0	1	1	15	205	True	213	235	367	367
A0A0B4LFD2	A0A0B4LFD2;P29845	A0A0B4LFD2;P29845	9;9	9;9	9;9	Heat shock 70 kDa protein cognate 5	Hsc70-5	;	2	9	9	9	16.9	16.9	16.9	74.065	686	686;686	0	75.152	50703000	50703000	11	11	16	60;114;115;318;346;377;392;405;493	True;True;True;True;True;True;True;True;True	61;121;122;332;362;394;409;422;511	67;134;135;378;416;453;471;485;602	99;100;210;211;606;669;732;733;764;789;1027	99;210;211;606;669;732;764;789;1027
A0A0B4LFL3	A0A0B4LFL3;O96827	A0A0B4LFL3;O96827	3;3	3;3	3;3	Probable elongation factor 1-beta	Ef1beta	;	2	3	3	3	14	14	14	24.247	222	222;222	0	17.547	9908500	9908500	3	3	17	8;180;299	True;True;True	8;188;310	8;207;352	9;324;559	9;324;559
A0A0B4LFZ4	A0A0B4LFZ4;Q7KN62	A0A0B4LFZ4;Q7KN62	4;4	4;4	4;4	Transitional endoplasmic reticulum ATPase TER94	TER94	;	2	4	4	4	6.1	6.1	6.1	91.923	825	825;801	0	28.765	11468000	11468000	5	5	18	21;98;110;497	True;True;True;True	21;104;117;516	22;113;130;607	30;178;205;206;1039	30;178;206;1039
A0A0B4LH50	A0A0B4LH50;P53501;P10981;P83967;M9PFZ6;P02574;P45891	A0A0B4LH50;P53501;P10981;P83967;M9PFZ6;P02574	14;14;14;13;10;10;2	1;1;1;1;1;1;0	1;1;1;1;1;1;0	Actin-57B;Actin-87E;Actin, indirect flight muscle;Actin, larval muscle	Act87E;Act57B;Act88F;Act79B	;;;;;	7	14	1	1	44.1	4.3	4.3	41.801	376	376;376;376;376;376;376;376	0	8.7124	13616000	13616000	2	2	19	16;48;68;73;74;175;184;201;235;367;421;454;462;533	False;False;False;False;False;False;False;False;False;False;False;False;False;True	16;48;69;70;75;76;183;192;209;246;384;438;472;480;552	17;52;53;76;77;78;84;85;200;211;230;276;443;505;506;551;562;563;645	23;24;75;76;77;78;111;112;113;121;122;123;311;312;328;361;434;715;827;828;829;830;831;903;919;920;921;922;1099;1100	23;75;113;122;123;312;328;361;434;715;828;903;922;1099	0	191
A0A0B4LJ12	A0A0B4LJ12;A0A0B4LHX6;P08879	A0A0B4LJ12;A0A0B4LHX6;P08879	2;2;2	2;2;2	2;2;2	Nucleoside diphosphate kinase	awd	;;	3	2	2	2	14.4	14.4	14.4	17.17	153	153;168;153	0	12.665	6529800	6529800	2	2	20	108;430	True;True	114;447	127;523	201;859	201;859
A0A126GUT1	A0A126GUT1;Q9VGS2	A0A126GUT1;Q9VGS2	2;2	2;2	2;2	Translationally-controlled tumor protein homolog	Tctp	;	2	2	2	2	12.2	12.2	12.2	19.637	172	172;172	0	12.836	9519800	9519800	1	1	21	295;402	True;True	306;419	347;482	552;786	552;786
A1Z6M6	A1Z6M6	A1Z6M6	1	1	1		Dpit47		1	1	1	1	2.3	2.3	2.3	46.906	396	396	0	9.1262	2949600	2949600	1	1	22	474	True	492	583	995	995
A1Z8S6	A1Z8S6	A1Z8S6	1	1	1		pds5		1	1	1	1	0.9	0.9	0.9	138.89	1218	1218	0.009009	5.7822	42425000	42425000	1	1	23	262	True	273	309	484	484
Q7JYK1	Q7JYK1;R9PY16;Q9W418;A4V1F9;P18101;P15357;P0CG69	Q7JYK1;R9PY16;Q9W418;A4V1F9;P18101;P15357;P0CG69	1;1;1;1;1;1;1	1;1;1;1;1;1;1	1;1;1;1;1;1;1	Ubiquitin-60S ribosomal protein L40;Ubiquitin;60S ribosomal protein L40;Ubiquitin-40S ribosomal protein S27a;Ubiquitin;40S ribosomal protein S27a;Polyubiquitin;Ubiquitin	RpL40;Ubi-p5E;Ubi-p63E;RpS27A	;;;;;;	7	1	1	1	12.5	12.5	12.5	14.729	128	128;301;534;763;128;156;763	0.0095238	5.9837	3920300	3920300	1	1	24	436	True	453	529	867	867
A4V391	A4V391;P12613	A4V391;P12613	3;3	3;3	3;3	T-complex protein 1 subunit alpha	T-cp1	;	2	3	3	3	6.8	6.8	6.8	59.556	557	557;557	0	18.978	7728000	7728000	3	3	25	112;410;523	True;True;True	119;427;542	132;492;635	208;804;1084	208;804;1084
C8VV14	C8VV14;F3YDE2;A4V3G1;P07764	C8VV14;F3YDE2;A4V3G1;P07764	1;1;1;1	1;1;1;1	1;1;1;1	Fructose-bisphosphate aldolase	Ald-RC;Ald-RH;Ald	;;;	4	1	1	1	3.9	3.9	3.9	39.047	361	361;363;363;361	0.0092593	5.8867	4175600	4175600	1	1	26	284	True	295	333	527	527
A4V4A5	A4V4A5;Q9VZ23	A4V4A5;Q9VZ23	1;1	1;1	1;1	GTP-binding nuclear protein Ran	Ran;ran	;	2	1	1	1	5.1	5.1	5.1	24.708	216	216;216	0.0083333	5.6614	2969800	2969800	1	1	27	134	True	142	157	244	244
Q0E924	Q0E924;A8DYI7;A8DYI6	Q0E924;A8DYI7;A8DYI6	2;2;2	2;2;2	2;2;2		Phb2	;;	3	2	2	2	7.4	7.4	7.4	33.066	299	299;303;338	0	14.162	2763100	2763100	2	2	28	155;487	True;True	163;505	179;596	283;1016	283;1016
Q7KUB0	Q7KUB0;Q8IQA7;Q9VSI6;Q7KUB1;B7Z0E0	Q7KUB0;Q8IQA7;Q9VSI6;Q7KUB1;B7Z0E0	3;3;3;3;3	3;3;3;3;3	3;3;3;3;3	Isocitrate dehydrogenase [NADP]	Idh	;;;;	5	3	3	3	7.9	7.9	7.9	46.66	416	416;437;450;469;479	0	16.823	7234700	7234700	2	2	29	18;47;371	True;True;True	18;47;388	19;51;447	27;74;723	27;74;723
C7LA75	C7LA75;P11147;P29843	C7LA75;P11147	19;19;1	19;19;1	15;15;0	Heat shock 70 kDa protein cognate 4	Hsc70-4-RA;Hsc70-4	;	3	19	19	15	35.6	35.6	27.2	71.131	651	651;651;641	0	194.74	352690000	352690000	44	44	30	42;45;61;104;124;125;188;207;240;274;300;310;335;409;418;455;458;472;508	True;True;True;True;True;True;True;True;True;True;True;True;True;True;True;True;True;True;True	42;45;62;110;132;133;196;215;251;285;311;323;351;426;435;473;476;490;527	46;49;68;121;145;146;215;237;238;281;282;322;353;354;367;368;404;490;491;501;502;552;557;558;581;618;619	67;68;71;72;101;192;193;224;225;226;227;335;336;337;369;370;371;440;441;501;560;561;562;563;581;582;653;801;802;803;820;821;822;823;904;905;911;912;913;991;992;993;1053;1054;1055	68;71;101;193;225;226;336;369;441;501;562;582;653;803;823;905;912;993;1055
C9QP42	C9QP42;Q02748;Q9VHS8	C9QP42;Q02748	13;13;1	13;13;1	13;13;1	Eukaryotic initiation factor 4A	eIF-4a	;	3	13	13	13	34.5	34.5	34.5	45.878	403	403;403;399	0	91.323	63877000	63877000	18	18	31	24;70;80;87;103;151;162;212;239;241;486;502;505	True;True;True;True;True;True;True;True;True;True;True;True;True	24;72;84;93;109;159;170;222;250;252;504;521;524	25;81;93;102;120;175;186;249;250;280;283;595;612;615	33;117;148;163;164;191;274;293;391;392;393;439;442;443;1014;1015;1045;1048	33;117;148;163;191;274;293;391;439;442;1015;1045;1048
D2NUK9	D2NUK9;Q9U3Z7	D2NUK9;Q9U3Z7	1;1	1;1	1;1	NHP2-like protein 1 homolog	hoip	;	2	1	1	1	9.4	9.4	9.4	13.883	127	127;127	0.0087719	5.7412	2757100	2757100	1	1	50	403	True	420	483	787	787
E1JGZ9	E1JGZ9;Q9XZJ4	E1JGZ9;Q9XZJ4	1;1	1;1	1;1	Proteasome subunit alpha type;Proteasome subunit alpha type-6	Prosalpha1	;	2	1	1	1	5.3	5.3	5.3	27.162	244	244;244	0.0091743	5.8795	4064900	4064900	1	1	51	22	True	22	23	31	31
F3YDH0	F3YDH0;P29844	F3YDH0;P29844	9;9	6;6	6;6	Heat shock 70 kDa protein cognate 3	Hsc70-3	;	2	9	6	6	17.7	11.7	11.7	72.26	656	656;656	0	41.642	24537000	24537000	7	7	52	62;67;79;207;232;310;319;334;472	True;True;True;False;True;False;True;True;False	63;68;83;215;243;323;333;350;490	69;75;92;237;238;273;367;368;379;403;581	102;109;110;147;369;370;371;430;581;582;607;652;991;992;993	102;110;147;369;430;582;607;652;993
G3M3A2	G3M3A2;Q06559	G3M3A2;Q06559	1;1	1;1	1;1	40S ribosomal protein S3	RpS3	;	2	1	1	1	3.7	3.7	3.7	27.471	246	246;246	0.010417	6.3005	3913500	3913500	2	2	53	12	True	12	12	14;15	15
X2JH42	X2JH42;L0MQ04;Q05825;Q8T4C4	X2JH42;L0MQ04;Q05825	11;11;11;2	11;11;11;2	11;11;11;2	ATP synthase subunit beta;ATP synthase subunit beta, mitochondrial	ATPsynbeta;ATPsyn-beta	;;	4	11	11	11	29.1	29.1	29.1	54.107	505	505;511;505;622	0	75.129	48792000	48792000	14	14	54	19;20;132;142;196;217;296;434;461;485;499	True;True;True;True;True;True;True;True;True;True;True	19;20;140;150;204;228;307;451;479;503;518	20;21;155;166;223;256;348;349;527;561;594;609	28;29;241;261;262;352;403;553;554;555;864;865;918;1013;1042	28;29;241;262;352;403;553;864;918;1013;1042
X2JDP6	X2JDP6;M9MRG2;Q8T079	X2JDP6;M9MRG2;Q8T079	1;1;1	1;1;1	1;1;1	Putative oxidoreductase GLYR1 homolog	CG4747	;;	3	1	1	1	3.3	3.3	3.3	65.251	602	602;603;602	0.0084034	5.6684	1326000	1326000	1	1	55	82	True	86	95	151	151
Q9VUC1	Q9VUC1;M9MSL3	Q9VUC1;M9MSL3	1;1	1;1	1;1		Hsc70Cb	;	2	1	1	1	1.5	1.5	1.5	88.5	804	804;836	0	6.6071	2008200	2008200	1	1	56	424	True	441	509	837	837
M9ND19	M9ND19;Q9W0P5	M9ND19;Q9W0P5	1;1	1;1	1;1	UDP-glucose 4-epimerase	Gale	;	2	1	1	1	3.4	3.4	3.4	38.696	350	350;350	0.0086207	5.7293	1374900	1374900	0	0	57	516	True	535	628	1077	1077
M9NE89	M9NE89;P08928	M9NE89;P08928	2;2	2;2	2;2	Lamin Dm0	Lam	;	2	2	2	2	2.9	2.9	2.9	71.299	622	622;622	0	11.046	3865600	3865600	2	2	58	327;473	True;True	341;491	392;582	635;994	635;994
M9NEV0	M9NEV0;Q9VMJ7	M9NEV0;Q9VMJ7	1;1	1;1	1;1	Lysine-specific demethylase lid	lid	;	2	1	1	1	1.1	1.1	1.1	203.99	1838	1838;1838	0.0084746	5.6914	384540	384540	0	0	59	404	True	421	484	788	788
M9NFR5	M9NFR5;Q95RE4	M9NFR5;Q95RE4	1;1	1;1	1;1		yps	;	2	1	1	1	4.7	4.7	4.7	36.978	340	340;352	0	6.5099	2998900	2998900	1	1	60	167	True	175	192	300	300
M9PBL3	M9PBL3;P02828	M9PBL3;P02828	21;21	21;21	21;21	Heat shock protein 83	Hsp83	;	2	21	21	21	27.9	27.9	27.9	81.864	717	717;717	0	166.39	167660000	167660000	31	31	61	31;71;75;88;94;95;105;106;128;144;185;187;226;370;375;387;397;425;443;446;515	True;True;True;True;True;True;True;True;True;True;True;True;True;True;True;True;True;True;True;True;True	31;73;77;94;100;101;111;112;136;152;193;195;237;387;392;404;414;442;460;463;534	33;34;82;86;103;109;110;122;123;124;149;150;168;212;214;267;446;451;463;477;510;536;537;541;627	47;48;49;50;118;119;124;165;174;175;194;195;196;197;230;231;264;329;330;333;334;421;721;722;729;749;779;838;880;881;889;1076	48;119;124;165;174;175;195;196;230;264;330;334;421;722;729;749;779;838;881;889;1076
M9PCC1	M9PCC1;O18640;M9PB67;Q9VYQ9	M9PCC1;O18640	4;4;1;1	4;4;1;1	4;4;1;1	Guanine nucleotide-binding protein subunit beta-like protein	Rack1	;	4	4	4	4	13.2	13.2	13.2	35.618	318	318;318;109;482	0	29.52	19843000	19843000	5	5	62	32;304;305;456	True;True;True;True	32;315;316;474	35;358;359;553;554	51;568;569;906;907	51;568;569;907
M9PD75	M9PD75;Q94920	M9PD75;Q94920	2;2	2;2	2;2	Voltage-dependent anion-selective channel	porin	;	2	2	2	2	7.1	7.1	7.1	30.55	282	282;282	0	11.737	8304500	8304500	2	2	63	9;534	True;True	9;553	9;646	10;1101;1102	10;1102
M9PE30	M9PE30;Q9VZI1	M9PE30;Q9VZI1	1;1	1;1	1;1	Transgelin	Chd64	;	2	1	1	1	7.4	7.4	7.4	19.406	175	175;188	0	6.517	2324500	2324500	1	1	64	149	True	157	173	272	272
M9PFK6	M9PFK6;Q04691	M9PFK6;Q04691	1;1	1;1	1;1	Fat-body protein 1	Fbp1	;	2	1	1	1	0.9	0.9	0.9	119.49	1027	1027;1029	0.008547	5.7087	0	0	1	1	65	137	True	145	161	252	252
M9PFN1	M9PFN1;Q9V3K3	M9PFN1;Q9V3K3	1;1	1;1	1;1	RuvB-like helicase 2	rept	;	2	1	1	1	2.3	2.3	2.3	53.541	481	481;481	0.0090909	5.8342	849490	849490	1	1	66	165	True	173	190	297	297
M9PG76	M9PG76;P19889	M9PG76;P19889	3;3	3;3	3;3	60S acidic ribosomal protein P0	RpLP0	;	2	3	3	3	12.9	12.9	12.9	34.202	317	317;317	0	23.556	19244000	19244000	4	4	67	56;121;500	True;True;True	57;129;519	63;142;610	92;218;219;1043	92;219;1043
M9PJN8	M9PJN8;P07487;P07486	M9PJN8;P07487;P07486	4;4;3	4;4;3	4;4;3	Glyceraldehyde-3-phosphate dehydrogenase;Glyceraldehyde-3-phosphate dehydrogenase 2;Glyceraldehyde-3-phosphate dehydrogenase 1	Gapdh2;Gapdh1	;;	3	4	4	4	18.1	18.1	18.1	35.369	332	332;332;332	0	34.287	31773000	31773000	6	6	68	145;265;491;504	True;True;True;True	153;276;509;523	169;312;600;614	265;266;487;1023;1024;1047	265;487;1023;1047
O02649	O02649;Q9VMN5	O02649	5;1	5;1	5;1	60 kDa heat shock protein, mitochondrial	Hsp60		2	5	5	5	10.3	10.3	10.3	60.808	573	573;576	0	36.401	23824000	23824000	7	7	69	6;174;251;260;494	True;True;True;True;True	6;182;262;271;512	6;199;296;306;603	6;7;310;462;463;481;1028	6;310;463;481;1028
O16043	O16043	O16043	1	1	1		Df31		1	1	1	1	6.6	6.6	6.6	18.823	183	183	0	6.6494	2586100	2586100	1	1	70	63	True	64	70	103	103
X2J5T3	X2J5T3;Q9W3Q0;O18334	X2J5T3;Q9W3Q0;O18334	1;1;1	1;1;1	1;1;1	Ras-related protein Rab6	Rab6;Rab39	;;	3	1	1	1	5.3	5.3	5.3	23.48	208	208;218;208	0.01087	6.3434	2651100	2651100	1	1	71	286	True	297	335	530	530
O97125	O97125;Q9VG58;Q9BIS2;Q9BIR7;Q8INI8;P82910;P02825;P11146	O97125;Q9VG58;Q9BIS2;Q9BIR7;Q8INI8;P82910;P02825;P11146	3;3;3;3;3;3;3;2	1;1;1;1;1;1;1;1	1;1;1;1;1;1;1;1	Heat shock protein 68;Major heat shock 70 kDa protein Bbb;Major heat shock 70 kDa protein Bb;Major heat shock 70 kDa protein Bc;Major heat shock 70 kDa protein Ba;Major heat shock 70 kDa protein Aa;Major heat shock 70 kDa protein Ab;Heat shock 70 kDa protein cognate 2	Hsp68;Hsp70Bbb;Hsp70Bb;Hsp70Bc;Hsp70Ba;Hsp70Aa;Hsp70Ab;Hsc70-2	;;;;;;;	8	3	1	1	6.8	2.5	2.5	69.743	635	635;641;641;641;641;642;642;633	0	8.7637	7736400	7736400	2	2	72	208;409;472	True;False;False	216;426;490	239;490;491;581	372;373;801;802;803;991;992;993	373;803;993
O97477	O97477	O97477	5	5	5	Inositol-3-phosphate synthase	Inos		1	5	5	5	9.7	9.7	9.7	62.249	565	565	0	30.601	10269000	10269000	5	5	73	2;338;343;401;536	True;True;True;True;True	2;354;359;418;555	2;407;413;481;648	2;656;666;785;1104	2;656;666;785;1104
P02283	P02283	P02283	2	2	2	Histone H2B	His2B		1	2	2	2	14.6	14.6	14.6	13.696	123	123	0	13.317	14244000	14244000	3	3	74	113;273	True;True	120;284	133;321	209;499;500	209;500
P06605	P06605;P06603;P06604	P06605;P06603;P06604	11;11;7	11;11;7	11;11;7	Tubulin alpha-3 chain;Tubulin alpha-1 chain;Tubulin alpha-2 chain	alphaTub84D;alphaTub84B;alphaTub85E	;;	3	11	11	11	31.8	31.8	31.8	49.89	450	450;450;449	0	93.739	164780000	164780000	22	22	75	49;81;101;200;254;325;357;358;457;481;531	True;True;True;True;True;True;True;True;True;True;True	49;85;107;208;265;339;373;374;475;499;550	54;55;94;117;228;229;299;389;390;429;430;555;556;590;643	79;80;81;149;150;186;187;358;359;360;468;628;629;630;631;694;695;908;909;910;1006;1097	81;149;186;359;468;629;694;695;909;1006;1097
P08736	P08736;A4V3Q6;P05303	P08736;A4V3Q6;P05303	10;7;7	10;7;7	10;7;7	Elongation factor 1-alpha 1;Elongation factor 1-alpha;Elongation factor 1-alpha 2	Ef1alpha48D;Ef1alpha100E	;;	3	10	10	10	27.9	27.9	27.9	50.306	463	463;462;462	0	128.92	333670000	331100000	27	27	76	96;195;282;308;359;364;415;417;475;537	True;True;True;True;True;True;True;True;True;True	102;203;293;319;320;375;380;432;434;493;556	111;222;331;363;364;431;438;439;497;498;500;584;649;650	176;349;350;351;522;523;524;573;574;575;576;577;696;697;709;710;812;813;814;815;816;819;996;997;1105;1106;1107;1108	176;351;522;575;697;710;815;819;996;1107	13	155
X2JCP8	X2JCP8;P10987;P02572	X2JCP8;P10987;P02572	15;15;14	15;15;14	2;2;2	Actin-5C;Actin-42A	Act5C;Act42A	;;	3	15	15	2	46.3	46.3	6.4	41.821	376	376;376;376	0	126.6	252070000	252070000	34	34	77	16;48;68;73;74;100;175;184;201;235;349;367;421;454;462	True;True;True;True;True;True;True;True;True;True;True;True;True;True;True	16;48;69;70;75;76;106;183;192;209;246;365;384;438;472;480	17;52;53;76;77;78;84;85;116;200;211;230;276;419;420;443;505;506;551;562;563	23;24;75;76;77;78;111;112;113;121;122;123;183;184;185;311;312;328;361;434;673;674;675;676;715;827;828;829;830;831;903;919;920;921;922	23;75;113;122;123;183;312;328;361;434;674;715;828;903;922	0	191
P13060	P13060	P13060	6	6	6	Elongation factor 2	EF2		1	6	6	6	8.2	8.2	8.2	94.458	844	844	0	38.794	24300000	24300000	8	8	78	93;117;333;411;489;527	True;True;True;True;True;True	99;124;349;428;507;546	108;137;402;493;598;639	172;173;213;651;805;1019;1020;1091	173;213;651;805;1020;1091
P25007	P25007	P25007	1	1	1	Peptidyl-prolyl cis-trans isomerase	Cyp1		1	1	1	1	6.2	6.2	6.2	24.666	227	227	0	7.2751	2638400	2638400	1	1	79	477	True	495	586	999	999
P35381	P35381	P35381	9	9	9	ATP synthase subunit alpha, mitochondrial	blw		1	9	9	9	19.4	19.4	19.4	59.421	552	552	0	67.185	57726000	57726000	14	14	80	46;86;176;373;426;431;450;488;498	True;True;True;True;True;True;True;True;True	46;92;184;390;443;448;467;506;517	50;101;201;449;511;524;545;597;608	73;162;313;725;726;839;840;860;894;895;1017;1018;1040;1041	73;162;313;725;840;860;895;1018;1041
P38979	P38979	P38979	3	3	3	40S ribosomal protein SA	sta		1	3	3	3	15.6	15.6	15.6	30.228	270	270	0	20.344	13021000	13021000	3	3	81	141;386;521	True;True;True	149;403;540	165;462;633	260;748;1082	260;748;1082
P40796	P40796	P40796	1	1	1	La protein homolog	La		1	1	1	1	3.8	3.8	3.8	44.884	390	390	0	7.4339	2336200	2336200	1	1	82	316	True	330	376	604	604
X2JFR6	X2JFR6;P41374	X2JFR6;P41374	2;2	2;2	2;2	Eukaryotic translation initiation factor 2 subunit 1	eIF-2alpha	;	2	2	2	2	6.5	6.5	6.5	38.645	341	341;341	0	13.535	3067200	3067200	3	3	83	29;164	True;True	29;172	30;31;189	43;44;296	44;296
P45594	P45594	P45594	1	1	1	Cofilin/actin-depolymerizing factor homolog	tsr		1	1	1	1	8.1	8.1	8.1	17.153	148	148	0	6.5053	3588500	3588500	1	1	84	522	True	541	634	1083	1083
P48588	P48588	P48588	1	1	1	40S ribosomal protein S25	RpS25		1	1	1	1	8.5	8.5	8.5	13.201	117	117	0.0089286	5.78	795280	795280	1	1	85	266	True	277	313	488	488
P48591	P48591	P48591	1	1	1	Ribonucleoside-diphosphate reductase large subunit	RnrL		1	1	1	1	1.6	1.6	1.6	91.977	812	812	0.0096154	6.0094	1111500	1111500	1	1	86	202	True	210	231	362	362
P52295	P52295	P52295	1	1	1	Importin subunit alpha	Pen		1	1	1	1	2.3	2.3	2.3	57.821	522	522	0.01	6.228	1598200	1598200	1	1	87	219	True	230	258	405	405
P54385	P54385;A0A0C4DHE7;Q8IMY1	P54385;A0A0C4DHE7;Q8IMY1	5;4;4	5;4;4	5;4;4	Glutamate dehydrogenase, mitochondrial;Glutamate dehydrogenase	Gdh	;;	3	5	5	5	10	10	10	62.536	562	562;391;404	0	28.592	14969000	14969000	5	5	88	54;55;150;218;532	True;True;True;True;True	55;56;158;229;551	61;62;174;257;644	90;91;273;404;1098	90;91;273;404;1098
P55828	P55828	P55828	2	2	2	40S ribosomal protein S20	RpS20		1	2	2	2	22.5	22.5	22.5	13.488	120	120	0	19.263	23115000	23115000	5	5	89	66;203	True;True	67;211	73;74;232;233	106;107;108;363;364	107;364
P92177	P92177	P92177	4	3	3	14-3-3 protein epsilon	14-3-3epsilon		1	4	3	3	16.4	13.4	13.4	29.798	262	262	0	18.534	9859400	9859400	4	4	90	182;210;328;524	True;True;False;True	190;219;342;543	209;244;393;636	326;382;636;1085;1086	326;382;636;1086
X2JKU5	X2JKU5;Q24186;A0A0B4K683;Q9VFE4	X2JKU5;Q24186;A0A0B4K683;Q9VFE4	2;2;1;1	2;2;1;1	2;2;1;1	40S ribosomal protein S5a;40S ribosomal protein S5b	RpS5a;RpS5b	;;;	4	2	2	2	9.2	9.2	9.2	25.434	228	228;228;180;230	0	12.499	2884200	2884200	3	3	91	39;490	True;True	39;508	42;599	61;1021;1022	61;1022
Q24492	Q24492	Q24492	2	2	2	Replication protein A 70 kDa DNA-binding subunit	RpA-70		1	2	2	2	3.6	3.6	3.6	66.624	603	603	0	12.252	5602100	5602100	2	2	92	5;194	True;True	5;202	5;221	5;348	5;348
Q24560	Q24560;A1ZBL0;P61857;A0A0B4LGH1;P08841;Q9VAX7;Q8MST5;CON__ENSEMBL:ENSBTAP00000025008	Q24560;A1ZBL0;P61857;A0A0B4LGH1;P08841	17;16;11;10;10;7;7;5	17;16;11;10;10;7;7;5	17;16;11;10;10;7;7;5	Tubulin beta-1 chain;Tubulin beta-2 chain;Tubulin beta-3 chain	betaTub56D;betaTub85D;betaTub60D	;;;;	8	17	17	17	39.6	39.6	39.6	50.147	447	447;456;446;453;454;457;457;536	0	213.83	219910000	200060000	54	54	93	35;50;102;119;135;136;214;216;224;227;242;253;261;330;336;427;529	True;True;True;True;True;True;True;True;True;True;True;True;True;True;True;True;True	35;50;51;108;126;127;143;144;224;225;227;235;238;253;264;272;344;352;444;548	38;56;57;118;119;139;140;158;159;160;252;253;255;263;264;268;284;285;298;307;308;395;405;512;513;514;515;516;517;518;519;520;641	55;56;82;83;84;85;188;189;190;215;216;245;246;247;248;249;250;251;395;396;397;398;401;402;412;413;414;422;423;444;445;465;466;467;482;483;638;654;841;842;843;844;845;846;847;848;849;850;851;852;853;854;855;1094;1095	55;84;189;216;246;250;397;402;413;423;444;466;483;638;654;841;1094	14;15;16	73;164;330
Q3YMU0	Q3YMU0	Q3YMU0	5	5	5	Protein disulfide-isomerase	ERp60		1	5	5	5	11.9	11.9	11.9	55.37	489	489	0	30.308	21034000	21034000	5	5	94	1;268;351;380;535	True;True;True;True;True	1;279;367;397;554	1;316;422;456;647	1;493;680;740;1103	1;493;680;740;1103
Q76NQ0	Q76NQ0	Q76NQ0	2	2	2	Dolichyl-diphosphooligosaccharide--protein glycosyltransferase subunit 1			1	2	2	2	4.4	4.4	4.4	51.709	458	458	0	11.488	1906400	1906400	1	1	95	206;294	True;True	214;305	236;346	368;551	368;551
Q7JXZ2	Q7JXZ2	Q7JXZ2	2	2	2		Eip55E		1	2	2	2	5.9	5.9	5.9	42.988	393	393	0	11.236	5962900	5962900	3	3	97	302;439	True;True	313;456	356;532	565;870;871	565;871
X2JE34	X2JE34;Q8IR13;Q9VXF8;Q7KUX7;X2JC79	X2JE34;Q8IR13;Q9VXF8;Q7KUX7;X2JC79	2;2;2;2;2	2;2;2;2;2	2;2;2;2;2		Rbp2	;;;;	5	2	2	2	8.2	8.2	8.2	34.23	317	317;324;325;358;388	0	11.701	5632000	5632000	2	2	98	433;519	True;True	450;538	526;631	863;1080	863;1080
Q7KW39	Q7KW39	Q7KW39	1	1	1	Probable methylmalonate-semialdehyde dehydrogenase [acylating], mitochondrial	CG17896		1	1	1	1	2.1	2.1	2.1	55.972	520	520	0.0098039	6.0973	3995000	3995000	1	1	99	438	True	455	531	869	869
Q8IPF5	Q8IPF5;Q9VLL3;Q86BM5	Q8IPF5;Q9VLL3;Q86BM5	1;1;1	1;1;1	1;1;1		Akap200	;;	3	1	1	1	4.6	4.6	4.6	38.168	372	372;753;837	0	11.634	4204300	4204300	1	1	100	85	True	91	100	161	161
Q8IPB1	Q8IPB1;Q9V3I1	Q8IPB1;Q9V3I1	1;1	1;1	1;1		dUTPase	;	2	1	1	1	8	8	8	18.485	174	174;188	0	8.0807	3167700	3167700	1	1	101	428	True	445	521	856	856
Q9V9A7	Q9V9A7	Q9V9A7	15	15	15	Probable methylcrotonoyl-CoA carboxylase beta chain, mitochondrial	l(2)04524		1	15	15	15	32.9	32.9	32.9	62.648	578	578	0	171.83	177680000	167950000	27	27	102	4;109;133;148;160;215;281;303;306;313;345;352;354;451;465	True;True;True;True;True;True;True;True;True;True;True;True;True;True;True	4;115;116;141;156;168;226;292;314;317;326;327;361;368;370;468;483	4;128;129;156;172;184;254;330;357;360;371;372;415;423;425;546;574	4;202;203;204;242;243;270;271;290;291;399;400;520;521;566;567;570;586;587;588;668;681;682;683;686;896;981	4;203;242;271;290;400;521;566;570;588;668;682;686;896;981	17;18	48;440
Q9VCH2	Q9VCH2	Q9VCH2	1	1	1		CG33111-RA		1	1	1	1	3.7	3.7	3.7	58.039	515	515	0.010526	6.303	26420000	26420000	1	1	104	97	True	103	112	177	177
Q9VEB1	Q9VEB1	Q9VEB1	1	1	1		Mdh2		1	1	1	1	3.3	3.3	3.3	35.318	336	336	0.0093458	5.8951	1173600	1173600	1	1	105	257	True	268	302	474	474
Q9VFF0	Q9VFF0	Q9VFF0	1	1	1		UQCR-C1		1	1	1	1	2.1	2.1	2.1	51.874	470	470	0.011111	6.3856	0	0	1	1	106	191	True	199	218	341	341
Q9VFV9	Q9VFV9	Q9VFV9	2	2	2		Droj2		1	2	2	2	6.9	6.9	6.9	45.23	403	403	0	14.144	14019000	14019000	2	2	107	25;127	True;True	25;135	26;148	34;229	34;229
Q9VH07	Q9VH07	Q9VH07	1	1	1	RuvB-like helicase 1	pont		1	1	1	1	2.4	2.4	2.4	50.242	456	456	0	6.8824	0	0	1	1	109	292	True	303	343	543	543
Q9VHL2	Q9VHL2	Q9VHL2	2	2	2		Tcp-1eta		1	2	2	2	4	4	4	59.386	544	544	0	11.59	1622000	1622000	0	0	110	199;271	True;True	207;282	227;319	357;497	357;497
Q9VHR8	Q9VHR8	Q9VHR8	1	1	1	Dipeptidyl peptidase 3	DppIII		1	1	1	1	1.7	1.7	1.7	89.193	786	786	0.010309	6.2839	0	0	1	1	111	342	True	358	412	665	665
Q9VJD1	Q9VJD1	Q9VJD1	1	1	1		GCS2beta		1	1	1	1	2	2	2	61.539	548	548	0.0088496	5.7505	1111600	1111600	1	1	112	120	True	128	141	217	217
Q9VLC5	Q9VLC5	Q9VLC5	2	2	2		Aldh		1	2	2	2	3.8	3.8	3.8	57.018	520	520	0	11.244	3404200	3404200	2	2	113	243;264	True;True	254;275	286;311	446;486	446;486
Q9VNE2	Q9VNE2	Q9VNE2	1	1	1	Protein krasavietz	kra		1	1	1	1	2.4	2.4	2.4	49.224	422	422	0.010638	6.3338	0	0	1	1	114	89	True	95	104	166	166
Q9VPN5	Q9VPN5	Q9VPN5	3	3	3		Hop		1	3	3	3	7.3	7.3	7.3	55.697	490	490	0	19.771	8263300	8263300	2	2	115	15;28;272	True;True;True	15;28;283	16;29;320	22;42;498	22;42;498
Q9VRD9	Q9VRD9	Q9VRD9	1	1	1	Cystathionine beta-synthase	Cbs		1	1	1	1	2.3	2.3	2.3	56.882	522	522	0.0082645	5.6569	2132000	2132000	0	0	116	116	True	123	136	212	212
Q9VSJ8	Q9VSJ8	Q9VSJ8	1	1	1	Exocyst complex component 7	exo70		1	1	1	1	2.2	2.2	2.2	80.025	693	693	0.0086957	5.7329	13380000	13380000	1	1	117	161	True	169	185	292	292
Q9VXQ5	Q9VXQ5	Q9VXQ5	4	4	4		Tcp-1zeta		1	4	4	4	9.2	9.2	9.2	58.246	533	533	0	22.081	9008400	9008400	4	4	119	3;36;329;344	True;True;True;True	3;36;343;360	3;39;394;414	3;57;637;667	3;57;637;667
Q9VYW2	Q9VYW2	Q9VYW2	12	12	12		Met		1	12	12	12	19.8	19.8	19.8	78.692	716	716	0	94.289	90918000	90918000	18	18	120	13;90;152;181;197;198;234;287;307;360;419;482	True;True;True;True;True;True;True;True;True;True;True;True	13;96;160;189;205;206;245;298;318;376;436;500	13;105;176;208;224;225;226;275;336;361;362;432;503;591	16;167;168;275;325;353;354;355;356;433;531;571;572;698;699;824;825;1007;1008	16;167;275;325;353;356;433;531;572;699;824;1008
Q9W3C0	Q9W3C0	Q9W3C0	1	1	1	Probable U3 small nucleolar RNA-associated protein 11	CG1789		1	1	1	1	4.6	4.6	4.6	28.538	237	237	0.009901	6.1821	28253000	28253000	2	2	122	222	True	233	261	409;410	409
X2JB48	X2JB48;Q26365;O62526	X2JB48;Q26365	11;10;2	11;10;2	11;10;2	ADP,ATP carrier protein	sesB	;	3	11	11	11	37.5	37.5	37.5	32.909	299	299;312;307	0	76.36	69465000	69465000	15	15	124	7;65;91;111;147;163;166;337;365;374;517	True;True;True;True;True;True;True;True;True;True;True	7;66;97;118;155;171;174;353;381;391;536	7;72;106;131;171;187;188;191;406;440;450;629	8;105;169;207;268;269;294;295;298;299;655;711;727;728;1078	8;105;169;207;268;295;298;655;711;728;1078
LC-MS analysis of boiling eluted proteins
Leading Protein	Protein IDs	Majority protein IDs	Peptide counts (all)	Peptide counts (razor+unique)	Peptide counts (unique)	Protein names	Gene names	Fasta headers	Number of proteins	Peptides	Razor + unique peptides	Unique peptides	Sequence coverage [%]	Unique + razor sequence coverage [%]	Unique sequence coverage [%]	Mol. weight [kDa]	Sequence length	Sequence lengths	Q-value	Score	Intensity	LFQ intensity	MS/MS count	MS/MS count	id	Peptide IDs	Peptide is razor	Mod. peptide IDs	Evidence IDs	MS/MS IDs	Best MS/MS	Oxidation (M) site IDs	Oxidation (M) site positions
A0A023GQA5	A0A023GQA5;P24156	A0A023GQA5;P24156	2;2	2;2	2;2	Protein l(2)37Cc	l(2)37Cc	;	2	2	2	2	8.3	8.3	8.3	30.383	276	276;276	0	11.377	5028400	5028400	1	1	0	98;530	True;True	99;550	109;659	165;1229	165;1229
A0A0B4JD11	A0A0B4JD11;Q9NJH0	A0A0B4JD11;Q9NJH0	3;3	3;3	3;3	Elongation factor 1-gamma	Ef1gamma	;	2	3	3	3	7.2	7.2	7.2	48.967	431	431;431	0	26.672	17302000	17302000	4	4	1	36;43;241	True;True;True	36;43;250	39;46;276	62;63;74;438	62;74;438
A0A0B4K6N1	A0A0B4K6N1;Q8MLY8	A0A0B4K6N1;Q8MLY8	2;2	2;2	2;2	40S ribosomal protein S8	RpS8	;	2	2	2	2	12	12	12	23.759	208	208;208	0	20.575	9145800	9145800	2	2	2	459;660	True;True	478;684	577;832	1099;1590;1591	1099;1591
A0A0B4K6U6	A0A0B4K6U6;Q08473	A0A0B4K6U6;Q08473	1;1	1;1	1;1	RNA-binding protein squid	sqd	;	2	1	1	1	3.2	3.2	3.2	33.054	308	308;344	0	6.7587	6057300	6057300	1	1	3	718	True	743	896	1716	1716
A0A0B4K7G4	A0A0B4K7G4;P13469	A0A0B4K7G4;P13469	4;4	4;4	4;4	DNA-binding protein modulo	mod	;	2	4	4	4	8.9	8.9	8.9	60.309	542	542;542	0	27.171	9252200	9252200	3	3	4	40;307;640;648	True;True;True;True	40;318;664;672	43;360;802;811	69;569;1475;1489	69;569;1475;1489
A0A0B4K8A5	A0A0B4K8A5;Q9W2F2	A0A0B4K8A5;Q9W2F2	1;1	1;1	1;1	Protein mahjong	mahj	;	2	1	1	1	0.7	0.7	0.7	172.08	1544	1544;1544	0.0071429	6.3062	12793000	12793000	2	2	5	372	True	383	438	696;697	697
A0A0B4KEH0	A0A0B4KEH0;P29310	A0A0B4KEH0;P29310	4;4	4;4	3;3	14-3-3 protein zeta	14-3-3zeta	;	2	4	4	3	17.7	17.7	14.5	28.227	248	248;248	0	34.118	174580000	174580000	4	4	6	446;572;577;723	True;True;True;True	461;594;599;748	555;716;722;901	1069;1338;1348;1723	1069;1338;1348;1723
A0A0B4KFZ9	A0A0B4KFZ9;P84040	A0A0B4KFZ9;P84040	5;5	5;5	5;5	Histone H4	His4r;His4	;	2	5	5	5	50.5	50.5	50.5	11.381	103	103;103	0	36.292	100470000	100470000	12	12	7	87;100;315;637;664	True;True;True;True;True	88;101;326;661;688	95;96;111;112;370;798;836	145;146;147;168;169;587;588;1470;1471;1595;1596;1597	147;169;587;1470;1596
A0A0B4KGP8	A0A0B4KGP8;Q24208;P45975	A0A0B4KGP8;Q24208;P45975	2;2;1	2;2;1	2;2;1	Eukaryotic translation initiation factor 2 subunit 3;Histone-lysine N-methyltransferase Su(var)3-9	eIF-2gamma;Su(var)3-9	;;	3	2	2	2	4.6	4.6	4.6	51.484	475	475;475;635	0	13.58	4417500	4417500	2	2	8	61;323	True;True	61;334	66;378	106;602	106;602
Q4AB57	Q4AB57;A0A0B4KH25;P84051;P08985	Q4AB57;A0A0B4KH25;P84051;P08985	2;2;2;2	2;2;2;2	2;2;2;2	Histone H2A;Histone H2A.v	His2A:CG33859;His2Av;His2A	;;;	4	2	2	2	12.9	12.9	12.9	13.364	124	124;141;124;141	0	13.711	41780000	41780000	4	4	9	22;256	True;True	22;265	25;294	38;39;463;464	39;463
A0A0B4KH34	A0A0B4KH34;P22464	A0A0B4KH34;P22464	4;4	4;4	4;4	Annexin;Annexin B9	AnxB9	;	2	4	4	4	11.4	11.4	11.4	35.944	324	324;324	0	23.832	10745000	10745000	4	4	10	27;347;521;598	True;True;True;True	27;358;541;620	30;407;650;749	45;643;1213;1387	45;643;1213;1387
A0A0B4KI24	A0A0B4KI24;Q27415	A0A0B4KI24;Q27415	2;2	2;2	2;2	Nucleoplasmin-like protein	Nlp	;	2	2	2	2	15.1	15.1	15.1	16.996	152	152;152	0	12.52	8235900	8235900	3	3	11	71;107	True;True	72;108	78;119	123;124;177	124;177
A0A0B4LEY6	A0A0B4LEY6;Q94518	A0A0B4LEY6;Q94518	1;1	1;1	1;1	Nascent polypeptide-associated complex subunit alpha	Nacalpha	;	2	1	1	1	6.9	6.9	6.9	23.021	217	217;217	0	8.0678	7596200	7596200	1	1	12	270	True	279	309	486	486
A0A0B4LF26	A0A0B4LF26;Q7K550	A0A0B4LF26;Q7K550	2;2	2;2	2;2	Eukaryotic translation initiation factor 3 subunit J	Adam	;	2	2	2	2	11.9	11.9	11.9	26.567	236	236;236	0	11.188	4090800	4090800	1	1	13	350;544	True;True	361;564	410;678	649;1263	649;1263
A0A0B4LFB3	A0A0B4LFB3;Q7JVI3	A0A0B4LFB3;Q7JVI3	1;1	1;1	1;1	Eukaryotic translation initiation factor 3 subunit M	Tango7	;	2	1	1	1	2.6	2.6	2.6	44.086	387	387;387	0.0066667	6.0362	1447200	1447200	1	1	14	292	True	301	338	532	532
A0A0B4LFD2	A0A0B4LFD2;P29845	A0A0B4LFD2;P29845	15;15	15;15	15;15	Heat shock 70 kDa protein cognate 5	Hsc70-5	;	2	15	15	15	22.9	22.9	22.9	74.065	686	686;686	0	106.87	83990000	83990000	18	18	15	64;82;106;159;161;351;431;471;506;507;542;558;559;629;688	True;True;True;True;True;True;True;True;True;True;True;True;True;True;True	64;83;107;165;167;362;446;490;526;527;562;579;580;653;712	69;90;118;184;186;411;534;592;635;636;676;696;697;787;788;863	110;140;176;288;290;650;1034;1119;1193;1194;1261;1297;1298;1299;1453;1454;1455;1456;1652	110;140;176;288;290;650;1034;1119;1193;1194;1261;1298;1299;1454;1652
A0A0B4LFL3	A0A0B4LFL3;O96827	A0A0B4LFL3;O96827	4;4	4;4	4;4	Probable elongation factor 1-beta	Ef1beta	;	2	4	4	4	18.9	18.9	18.9	24.247	222	222;222	0	28.262	20779000	20779000	5	5	16	11;47;252;405	True;True;True;True	11;47;261;416	12;50;289;478	17;78;456;457;773	17;78;456;773
A0A0B4LFZ4	A0A0B4LFZ4;Q7KN62	A0A0B4LFZ4;Q7KN62	2;2	2;2	2;2	Transitional endoplasmic reticulum ATPase TER94	TER94	;	2	2	2	2	2.4	2.4	2.4	91.923	825	825;801	0	11.247	1750500	1750500	1	1	17	139;155	True;True	144;161	160;180	248;282	248;282
A0A0B4LG52	A0A0B4LG52;Q9W237	A0A0B4LG52;Q9W237	4;4	4;4	4;4	40S ribosomal protein S16	RpS16	;	2	4	4	4	26.4	26.4	26.4	16.774	148	148;148	0	23.907	12374000	12374000	4	4	18	42;380;514;610	True;True;True;True	42;391;534;632	45;447;643;761	73;725;1203;1411	73;725;1203;1411
A0A0B4LGZ5	A0A0B4LGZ5;P46222	A0A0B4LGZ5;P46222	2;2	2;2	2;2	60S ribosomal protein L11	RpL11	;	2	2	2	2	12.5	12.5	12.5	21.112	184	184;184	0	11.515	8444500	8444500	3	3	19	676;708	True;True	700;733	850;885	1633;1634;1690	1633;1690
A0A0B4LH50	A0A0B4LH50;P83967;P53501;P10981;M9PFZ6;P02574;P45891	A0A0B4LH50;P83967;P53501;P10981;M9PFZ6;P02574	13;13;13;13;9;9;2	1;1;1;1;1;1;0	1;1;1;1;1;1;0	Actin, indirect flight muscle;Actin-57B;Actin-87E;Actin, larval muscle	Act87E;Act88F;Act57B;Act79B	;;;;;	7	13	1	1	36.2	4.3	4.3	41.801	376	376;376;376;376;376;376;376	0	7.1353	18448000	18448000	2	2	20	21;67;99;108;109;244;258;288;325;509;578;647;729	False;False;False;False;False;False;False;False;False;False;False;False;True	21;67;100;109;110;253;267;297;336;529;600;671;755	24;72;73;110;120;121;279;296;332;380;638;723;809;810;908;909	35;36;37;113;114;115;166;167;178;179;180;441;442;466;520;521;604;1196;1349;1350;1484;1485;1486;1487;1488;1734;1735	36;113;166;179;180;441;466;520;604;1196;1350;1484;1734
A0A0B4LJ12	A0A0B4LJ12;A0A0B4LHX6;P08879	A0A0B4LJ12;A0A0B4LHX6;P08879	2;2;2	2;2;2	2;2;2	Nucleoside diphosphate kinase	awd	;;	3	2	2	2	13.1	13.1	13.1	17.17	153	153;168;153	0	12.056	3404300	3404300	2	2	21	263;595	True;True	272;617	301;746	475;1384	475;1384
Q9V3D8	Q9V3D8;A0A0C4FEI8	Q9V3D8;A0A0C4FEI8	1;1	1;1	1;1		grsm	;	2	1	1	1	2.2	2.2	2.2	60.169	558	558;655	0.0070423	6.2571	1677100	1677100	0	0	22	634	True	658	795	1466	1466
A0A126GUT1	A0A126GUT1;Q9VGS2	A0A126GUT1;Q9VGS2	1;1	1;1	1;1	Translationally-controlled tumor protein homolog	Tctp	;	2	1	1	1	5.2	5.2	5.2	19.637	172	172;172	0	7.105	7723200	7723200	1	1	23	557	True	578	695	1296	1296
A1Z6M6	A1Z6M6	A1Z6M6	3	3	3		Dpit47		1	3	3	3	7.3	7.3	7.3	46.906	396	396	0	18.617	12009000	12009000	4	4	24	88;519;661	True;True;True	89;539;685	97;648;833	148;1208;1209;1592	148;1208;1592
Q7JYK1	Q7JYK1;R9PY16;Q9W418;A4V1F9;P18101;P15357;P0CG69	Q7JYK1;R9PY16;Q9W418;A4V1F9;P18101;P15357;P0CG69	2;2;2;2;2;2;2	2;2;2;2;2;2;2	2;2;2;2;2;2;2	Ubiquitin-60S ribosomal protein L40;Ubiquitin;60S ribosomal protein L40;Ubiquitin-40S ribosomal protein S27a;Ubiquitin;40S ribosomal protein S27a;Polyubiquitin;Ubiquitin	RpL40;Ubi-p5E;Ubi-p63E;RpS27A	;;;;;;	7	2	2	2	19.5	19.5	19.5	14.729	128	128;301;534;763;128;156;763	0	14.569	12049000	12049000	2	2	25	600;612	True;True	622;634	751;763	1390;1413	1390;1413
A4V303	A4V303;P48605	A4V303;P48605	6;6	6;6	6;6	T-complex protein 1 subunit gamma	Cctgamma	;	2	6	6	6	11.6	11.6	11.6	59.394	544	544;544	0	39.405	17978000	17978000	8	8	26	93;269;305;447;588;605	True;True;True;True;True;True	94;278;316;462;610;627	104;308;358;556;557;739;756	158;485;567;1070;1071;1375;1398;1399	158;485;567;1070;1375;1398
A4V391	A4V391;P12613	A4V391;P12613	9;9	9;9	9;9	T-complex protein 1 subunit alpha	T-cp1	;	2	9	9	9	17.6	17.6	17.6	59.556	557	557;557	0	54.459	28947000	28947000	9	9	27	86;157;231;266;369;564;567;574;721	True;True;True;True;True;True;True;True;True	87;163;240;275;380;585;588;596;746	94;182;265;304;435;704;708;718;899	144;285;419;480;691;1315;1321;1340;1720	144;285;419;480;691;1315;1321;1340;1720
A4V4A5	A4V4A5;Q9VZ23	A4V4A5;Q9VZ23	3;3	3;3	3;3	GTP-binding nuclear protein Ran	Ran;ran	;	2	3	3	3	15.7	15.7	15.7	24.708	216	216;216	0	17.829	18365000	18365000	4	4	28	189;448;651	True;True;True	197;463;675	217;558;823	340;1072;1576;1577	340;1072;1576
Q0E924	Q0E924;A8DYI7;A8DYI6	Q0E924;A8DYI7;A8DYI6	2;2;2	2;2;2	2;2;2		Phb2	;;	3	2	2	2	7.7	7.7	7.7	33.066	299	299;303;338	0	17.322	9599000	9599000	2	2	29	324;678	True;True	335;702	379;852	603;1637	603;1637
A8Y560	A8Y560;O17445	A8Y560;O17445	2;2	2;2	2;2	Ribosomal protein L15;60S ribosomal protein L15	RpL15	;	2	2	2	2	7.8	7.8	7.8	24.325	204	204;204	0	13.738	6797800	6797800	2	2	30	227;728	True;True	235;754	260;907	412;1733	412;1733
B5RJQ0	B5RJQ0;Q95028	B5RJQ0;Q95028	1;1	1;1	1;1	L-lactate dehydrogenase	ImpL3	;	2	1	1	1	3.6	3.6	3.6	35.537	332	332;332	0	9.18	5660500	5660500	1	1	31	670	True	694	843	1621	1621
Q7KUB0	Q7KUB0;Q8IQA7;Q9VSI6;Q7KUB1;B7Z0E0	Q7KUB0;Q8IQA7;Q9VSI6;Q7KUB1;B7Z0E0	3;3;3;3;3	3;3;3;3;3	3;3;3;3;3	Isocitrate dehydrogenase [NADP]	Idh	;;;;	5	3	3	3	9.1	9.1	9.1	46.66	416	416;437;450;469;479	0	20.177	12569000	12569000	4	4	32	23;66;632	True;True;True	23;66;656	26;71;791;792	40;112;1460;1461	40;112;1461
B7Z0X1	B7Z0X1;Q9W457	B7Z0X1;Q9W457	1;1	1;1	1;1	Serine hydroxymethyltransferase		;	2	1	1	1	1.7	1.7	1.7	50.984	467	467;537	0.0067568	6.1096	1268700	1268700	1	1	33	273	True	282	312	492	492
X2JCX8	X2JCX8;C0HKA1;C0HKA0	X2JCX8;C0HKA1;C0HKA0	2;2;2	2;2;2	2;2;2		RpS14b	;;	3	2	2	2	15.9	15.9	15.9	16.265	151	151;151;151	0	13.228	8268500	8268500	2	2	34	271;619	True;True	280;641	310;771	487;1427	487;1427
C0HL67	C0HL67;C0HL66;P02299	C0HL67;C0HL66;P02299	1;1;1	1;1;1	1;1;1	Histone H3	His3	;;	3	1	1	1	5.1	5.1	5.1	15.328	136	136;136;136	0.0069444	6.1961	11226000	11226000	1	1	35	566	True	587	707	1320	1320
C7LA75	C7LA75;P11147;P29843	C7LA75;P11147	25;25;1	25;25;1	20;20;0	Heat shock 70 kDa protein cognate 4	Hsc70-4-RA;Hsc70-4	;	3	25	25	20	37.6	37.6	29.2	71.131	651	651;651;641	0	234.84	599480000	595890000	56	56	36	54;63;83;147;160;175;177;178;262;274;275;294;331;371;407;408;420;458;488;565;575;630;638;659;705	True;True;True;True;True;True;True;True;True;True;True;True;True;True;True;True;True;True;True;True;True;True;True;True;True	54;63;84;152;166;182;184;185;271;283;284;303;342;382;418;419;432;477;507;586;597;654;662;683;730	57;58;68;91;170;185;201;203;204;205;300;313;314;315;316;340;341;386;387;437;480;481;482;495;576;611;705;706;719;720;789;799;800;831;881;882	92;93;94;108;109;141;265;266;289;311;313;314;315;316;317;318;472;473;474;493;494;495;496;534;535;536;612;613;695;776;777;778;779;780;801;1097;1098;1156;1316;1317;1318;1319;1341;1342;1343;1344;1345;1457;1472;1473;1588;1589;1682;1683;1684;1685	94;109;141;266;289;311;314;316;473;494;495;536;613;695;778;780;801;1098;1156;1317;1344;1457;1473;1588;1682
M9NG50	M9NG50;M9PHG2;C7LAH9;P46150	M9NG50;M9PHG2;C7LAH9;P46150	1;1;1;1	1;1;1;1	1;1;1;1	Moesin/ezrin/radixin homolog 1	Moe	;;;	4	1	1	1	1.7	1.7	1.7	68.14	578	578;584;646;578	0	6.3802	1066400	1066400	1	1	37	96	True	97	107	163	163
C9QP42	C9QP42;Q02748;Q9VHS8	C9QP42;Q02748	13;13;2	13;13;2	13;13;2	Eukaryotic initiation factor 4A	eIF-4a	;	3	13	13	13	33.7	33.7	33.7	45.878	403	403;403;399	0	92.908	79598000	79598000	20	20	38	28;102;118;129;146;220;233;298;330;332;669;677;696	True;True;True;True;True;True;True;True;True;True;True;True;True	28;103;122;134;151;228;242;309;341;343;693;701;721	31;114;136;149;169;252;268;350;351;385;388;842;851;872	46;171;208;209;230;263;264;401;424;554;555;556;611;614;1619;1620;1635;1636;1667;1668	46;171;209;230;264;401;424;554;611;614;1619;1635;1668
E1JGZ9	E1JGZ9;Q9XZJ4	E1JGZ9;Q9XZJ4	4;4	4;4	4;4	Proteasome subunit alpha type;Proteasome subunit alpha type-6	Prosalpha1	;	2	4	4	4	17.6	17.6	17.6	27.162	244	244;244	0	23.844	8771300	8771300	4	4	65	25;438;590;710	True;True;True;True	25;453;612;735	28;542;741;888	42;1047;1377;1696	42;1047;1377;1696
E1JHA4	E1JHA4;P48809	E1JHA4;P48809	1;1	1;1	1;1	Heterogeneous nuclear ribonucleoprotein 27C	Hrb27C	;	2	1	1	1	4.8	4.8	4.8	44.769	421	421;421	0	6.7123	1593200	1593200	1	1	66	50	True	50	53	84	84
E1JJM9	E1JJM9;Q7KR04;P48149	E1JJM9;Q7KR04;P48149	2;2;2	2;2;2	2;2;2	40S ribosomal protein S15Ab;40S ribosomal protein S15Aa	RpS15Aa;RpS15Ab	;;	3	2	2	2	13.8	13.8	13.8	14.771	130	130;130;130	0	11.891	7512100	7512100	2	2	67	422;707	True;True	434;732	497;884	803;1689	803;1689
E2QD65	E2QD65;P39018	E2QD65;P39018	4;4	4;4	4;4	40S ribosomal protein S19a	RpS19a	;	2	4	4	4	21.8	21.8	21.8	17.291	156	156;156	0	24.152	15789000	15789000	4	4	68	39;65;268;556	True;True;True;True	39;65;277;577	42;70;307;694	68;111;484;1294;1295	68;111;484;1295
F3YDH0	F3YDH0;P29844	F3YDH0;P29844	12;12	8;8	8;8	Heat shock 70 kDa protein cognate 3	Hsc70-3	;	2	12	8	8	21.2	15.2	15.2	72.26	656	656;656	0	56.532	45985000	45985000	12	12	69	84;95;117;160;294;321;397;420;433;457;460;659	True;True;True;False;False;True;True;False;True;True;True;False	85;96;121;166;303;332;408;432;448;476;479;683	92;106;135;185;340;341;376;470;495;536;575;578;831	142;160;161;162;207;289;534;535;536;598;763;764;801;1036;1037;1096;1100;1588;1589	142;161;207;289;536;598;764;801;1036;1096;1100;1588
G3M3A2	G3M3A2;Q06559	G3M3A2;Q06559	7;7	7;7	7;7	40S ribosomal protein S3	RpS3	;	2	7	7	7	27.6	27.6	27.6	27.471	246	246;246	0	49.224	55438000	55438000	11	11	70	9;16;222;327;336;593;680	True;True;True;True;True;True;True	9;16;230;338;347;615;704	10;17;255;382;393;394;744;854	15;24;25;405;406;608;619;620;621;1382;1640	15;25;405;608;621;1382;1640
L0MPS3	L0MPS3;Q9V496	L0MPS3;Q9V496	1;1	1;1	1;1	Apolipophorins;Apolipophorin-2;Apolipophorin-1	Rfabg	;	2	1	1	1	0.2	0.2	0.2	372.67	3351	3351;3351	0	6.3463	0	0	2	2	71	671	True	695	844;845	1622;1623	1623
X2JH42	X2JH42;L0MQ04;Q05825;Q8T4C4	X2JH42;L0MQ04;Q05825	8;8;8;2	8;8;8;2	8;8;8;2	ATP synthase subunit beta;ATP synthase subunit beta, mitochondrial	ATPsynbeta;ATPsyn-beta	;;	4	8	8	8	18.8	18.8	18.8	54.107	505	505;511;505;622	0	58.006	34944000	34944000	9	9	72	199;280;401;404;597;645;675;694	True;True;True;True;True;True;True;True	207;289;412;415;619;669;699;719	229;321;474;477;748;807;849;870	360;361;503;504;769;772;1386;1482;1632;1665	361;503;769;772;1386;1482;1632;1665
M9PE40	M9PE40;M9MRD0;P35122	M9PE40;M9MRD0;P35122	1;1;1	1;1;1	1;1;1	Ubiquitin carboxyl-terminal hydrolase	Uch	;;	3	1	1	1	4.9	4.9	4.9	25.429	224	224;227;227	0	6.3478	3939900	3939900	1	1	73	249	True	258	286	452	452
M9NEQ9	M9NEQ9;Q9VWG3;Q9VB14	M9NEQ9;Q9VWG3	4;4;1	4;4;1	4;4;1	40S ribosomal protein S10b	RpS10b	;	3	4	4	4	31.9	31.9	31.9	17.878	160	160;160;163	0	23.001	13724000	13724000	4	4	74	207;257;579;644	True;True;True;True	215;266;601;668	237;295;724;806	373;465;1351;1481	373;465;1351;1481
M9PBL3	M9PBL3;P02828	M9PBL3;P02828	21;21	21;21	21;21	Heat shock protein 83	Hsp83	;	2	21	21	21	30.4	30.4	30.4	81.864	717	717;717	0	175.98	201050000	201050000	32	32	75	37;104;110;131;137;145;151;152;181;200;242;259;261;490;515;551;585;614;618;715;732	True;True;True;True;True;True;True;True;True;True;True;True;True;True;True;True;True;True;True;True;True	37;105;111;136;142;150;156;157;189;208;251;268;270;509;535;571;607;636;640;740;758	40;116;122;151;158;168;174;175;176;209;230;277;297;299;613;644;686;730;765;770;893;912	64;65;173;174;181;232;233;245;246;262;272;273;274;275;325;362;439;467;468;471;1160;1161;1204;1280;1281;1359;1415;1416;1426;1711;1712;1739;1740	64;173;181;232;246;262;273;275;325;362;439;468;471;1161;1204;1281;1359;1415;1426;1712;1740
M9PCC1	M9PCC1;O18640;M9PB67;Q9VYQ9	M9PCC1;O18640	8;8;2;1	8;8;2;1	8;8;2;1	Guanine nucleotide-binding protein subunit beta-like protein	Rack1	;	4	8	8	8	27	27	27	35.618	318	318;318;109;482	0	51.967	54112000	54112000	13	13	76	38;101;195;413;414;633;701;702	True;True;True;True;True;True;True;True	38;102;203;424;425;657;726;727	41;113;224;487;488;793;794;877;878	66;67;170;351;788;789;790;1462;1463;1464;1465;1674;1675	67;170;351;788;790;1465;1674;1675
M9PD75	M9PD75;Q94920	M9PD75;Q94920	7;7	7;7	7;7	Voltage-dependent anion-selective channel	porin	;	2	7	7	7	31.9	31.9	31.9	30.55	282	282;282	0	41.987	34892000	34892000	8	8	77	12;46;388;398;627;682;730	True;True;True;True;True;True;True	12;46;399;409;650;706;756	13;49;457;471;784;856;910	18;77;742;765;1448;1642;1736;1737	18;77;742;765;1448;1642;1737
M9PFF0	M9PFF0;P41126	M9PFF0;P41126	3;3	3;3	3;3	60S ribosomal protein L13	RpL13	;	2	3	3	3	12.4	12.4	12.4	24.951	218	218;218	0	17.452	7195100	7195100	3	3	79	357;434;641	True;True;True	368;449;665	421;537;803	671;1038;1476	671;1038;1476
M9PG76	M9PG76;P19889	M9PG76;P19889	6;6	6;6	6;6	60S acidic ribosomal protein P0	RpLP0	;	2	6	6	6	23	23	23	34.202	317	317;317	0	41.099	39719000	39719000	8	8	80	75;171;217;230;624;695	True;True;True;True;True;True	76;178;225;239;646;720	83;197;248;249;264;777;871	129;305;396;397;398;418;1438;1666	129;305;397;418;1438;1666
M9PJN8	M9PJN8;P07487;P07486;Q7JY07	M9PJN8;P07487;P07486	4;4;3;1	4;4;3;1	4;4;3;1	Glyceraldehyde-3-phosphate dehydrogenase;Glyceraldehyde-3-phosphate dehydrogenase 2;Glyceraldehyde-3-phosphate dehydrogenase 1	Gapdh2;Gapdh1	;;	4	4	4	4	16	16	16	35.369	332	332;332;332;343	0	37.647	43460000	43460000	7	7	81	201;395;685;697	True;True;True;True	209;406;709;722	231;468;859;873	363;364;760;761;1646;1647;1669	363;761;1647;1669
O02649	O02649;Q9VMN5	O02649	7;2	7;2	7;2	60 kDa heat shock protein, mitochondrial	Hsp60		2	7	7	7	14.5	14.5	14.5	60.808	573	573;576	0	51.839	36000000	36000000	7	7	82	7;243;281;343;346;464;667	True;True;True;True;True;True;True	7;252;290;354;357;483;691	8;278;322;403;406;583;840	13;440;505;637;642;1108;1616	13;440;505;637;642;1108;1616
X2J5T3	X2J5T3;Q9W3Q0;O18334	X2J5T3;Q9W3Q0;O18334	1;1;1	1;1;1	1;1;1	Ras-related protein Rab6	Rab6;Rab39	;;	3	1	1	1	5.3	5.3	5.3	23.48	208	208;218;208	0.0070922	6.2697	3096100	3096100	1	1	83	383	True	394	451	731	731
O46339	O46339	O46339	1	1	1	Homeobox protein homothorax	hth		1	1	1	1	1.4	1.4	1.4	52.784	487	487	0.006993	6.248	3565800	3565800	3	3	84	649	True	673	812	1490;1491;1492	1490
O62619	O62619	O62619	4	4	4	Pyruvate kinase	PyK		1	4	4	4	9.9	9.9	9.9	57.44	533	533	0	23.694	16488000	16488000	5	5	85	55;206;381;421	True;True;True;True	55;214;392;433	59;236;448;449;496	95;372;726;727;728;802	95;372;728;802
O97125	O97125;Q9VG58;Q9BIS2;Q9BIR7;Q8INI8;P82910;P02825;P11146	O97125;Q9VG58;Q9BIS2;Q9BIR7;Q8INI8;P82910;P02825;P11146	3;3;3;3;3;3;3;2	1;1;1;1;1;1;1;1	1;1;1;1;1;1;1;1	Heat shock protein 68;Major heat shock 70 kDa protein Bbb;Major heat shock 70 kDa protein Bb;Major heat shock 70 kDa protein Bc;Major heat shock 70 kDa protein Ba;Major heat shock 70 kDa protein Aa;Major heat shock 70 kDa protein Ab;Heat shock 70 kDa protein cognate 2	Hsp68;Hsp70Bbb;Hsp70Bb;Hsp70Bc;Hsp70Ba;Hsp70Aa;Hsp70Ab;Hsc70-2	;;;;;;;	8	3	1	1	6.8	2.5	2.5	69.743	635	635;641;641;641;641;642;642;633	0	21.68	11581000	11581000	3	3	86	295;565;659	True;False;False	304;586;683	342;343;705;706;831	537;538;539;1316;1317;1318;1319;1588;1589	538;1317;1588
O97477	O97477	O97477	5	5	5	Inositol-3-phosphate synthase	Inos		1	5	5	5	10.4	10.4	10.4	62.249	565	565	0	35.569	15545000	15545000	5	5	87	3;205;449;463;468	True;True;True;True;True	3;213;464;482;487	3;235;559;582;588	3;371;1073;1107;1115	3;371;1073;1107;1115
P02283	P02283	P02283	3	3	3	Histone H2B	His2B		1	3	3	3	20.3	20.3	20.3	13.696	123	123	0	18.15	31965000	31965000	7	7	88	141;158;370	True;True;True	146;164;381	163;183;436	252;253;286;287;692;693;694	253;286;693
P04359	P04359	P04359	2	2	2	60S ribosomal protein L32	RpL32		1	2	2	2	12.7	12.7	12.7	16.02	134	134	0	12.166	1383500	1383500	2	2	89	148;187	True;True	153;195	171;215	267;336	267;336
P06605	P06605;P06603;P06604	P06605;P06603;P06604	16;16;10	16;16;10	16;16;10	Tubulin alpha-3 chain;Tubulin alpha-1 chain;Tubulin alpha-2 chain	alphaTub84D;alphaTub84B;alphaTub85E	;;	3	16	16	16	38.4	38.4	38.4	49.89	450	450;450;449	0	146.28	298530000	296500000	34	34	90	68;119;130;143;286;345;390;391;444;492;493;513;599;636;668;727	True;True;True;True;True;True;True;True;True;True;True;True;True;True;True;True	68;123;135;148;295;356;401;402;459;511;512;533;621;660;692;752;753	74;137;150;165;328;329;405;463;464;552;553;615;616;617;642;750;797;841;905;906	116;210;211;212;231;256;257;511;512;513;514;515;516;517;641;754;755;1064;1065;1066;1067;1163;1164;1165;1166;1202;1388;1389;1468;1469;1617;1618;1731;1732	116;211;231;256;513;641;754;755;1065;1165;1166;1202;1388;1469;1618;1732	20	313
P08736	P08736;A4V3Q6;P05303	P08736;A4V3Q6;P05303	9;6;6	9;6;6	9;6;6	Elongation factor 1-alpha 1;Elongation factor 1-alpha;Elongation factor 1-alpha 2	Ef1alpha48D;Ef1alpha100E	;;	3	9	9	9	25.3	25.3	25.3	50.306	463	463;462;462	0	77.239	469550000	464470000	23	23	91	279;378;418;494;502;571;573;662;734	True;True;True;True;True;True;True;True;True	288;389;429;430;513;521;593;595;686;760	320;445;492;493;618;628;714;715;717;834;914;915	500;501;502;722;723;795;796;797;798;799;1167;1183;1184;1334;1335;1336;1337;1339;1593;1743;1744;1745;1746	500;723;798;1167;1183;1336;1339;1593;1746	21	155
X2JCP8	X2JCP8;P10987;P02572	X2JCP8;P10987;P02572	14;14;13	14;14;13	2;2;2	Actin-5C;Actin-42A	Act5C;Act42A	;;	3	14	14	2	38.3	38.3	6.4	41.821	376	376;376;376	0	116.53	249450000	249450000	29	29	92	21;67;99;108;109;142;244;258;288;325;477;509;578;647	True;True;True;True;True;True;True;True;True;True;True;True;True;True	21;67;100;109;110;147;253;267;297;336;496;529;600;671	24;72;73;110;120;121;164;279;296;332;380;598;638;723;809;810	35;36;37;113;114;115;166;167;178;179;180;254;255;441;442;466;520;521;604;1129;1130;1196;1349;1350;1484;1485;1486;1487;1488	36;113;166;179;180;255;441;466;520;604;1130;1196;1350;1484
P17704	P17704	P17704	1	1	1	40S ribosomal protein S17	RpS17		1	1	1	1	10.7	10.7	10.7	15.285	131	131	0	9.8435	6417100	6417100	1	1	93	226	True	234	259	411	411
P17917	P17917	P17917	2	2	2	Proliferating cell nuclear antigen	PCNA		1	2	2	2	8.1	8.1	8.1	28.83	260	260	0	11.735	7156000	7156000	2	2	94	192;423	True;True	200;435	221;498	348;804	348;804
Q95TP9	Q95TP9;P29327	Q95TP9;P29327	2;2	2;2	2;2	40S ribosomal protein S6	RpS6	;	2	2	2	2	9.7	9.7	9.7	24.696	217	217;248	0	11.98	2210400	2210400	2	2	95	94;359	True;True	95;370	105;423	159;674	159;674
P35381	P35381	P35381	9	9	9	ATP synthase subunit alpha, mitochondrial	blw		1	9	9	9	17.9	17.9	17.9	59.421	552	552	0	68.851	54196000	54196000	13	13	96	91;127;150;245;517;586;623;679;693	True;True;True;True;True;True;True;True;True	92;132;155;254;537;608;645;703;718	100;146;147;173;280;646;731;776;853;869	151;227;228;271;443;1206;1360;1436;1437;1638;1639;1663;1664	151;228;271;443;1206;1360;1437;1638;1664
P38979	P38979	P38979	3	3	3	40S ribosomal protein SA	sta		1	3	3	3	13.7	13.7	13.7	30.228	270	270	0	23.844	16237000	16237000	4	4	97	10;198;719	True;True;True	10;206;744	11;228;897	16;358;359;1717	16;358;1717
P41094	P41094	P41094	4	4	4	40S ribosomal protein S18	RpS18		1	4	4	4	27	27	27	17.611	152	152	0	25.133	22256000	22256000	4	4	98	299;684;700;733	True;True;True;True	310;708;725;759	352;858;876;913	557;1645;1673;1741;1742	557;1645;1673;1741
X2JFR6	X2JFR6;P41374	X2JFR6;P41374	2;2	2;2	2;2	Eukaryotic translation initiation factor 2 subunit 1	eIF-2alpha	;	2	2	2	2	6.5	6.5	6.5	38.645	341	341;341	0	15.501	4356200	4356200	2	2	99	34;223	True;True	34;231	37;256	59;407	59;407
P45594	P45594	P45594	3	3	3	Cofilin/actin-depolymerizing factor homolog	tsr		1	3	3	3	23	23	23	17.153	148	148	0	21.081	11143000	11143000	4	4	100	352;483;720	True;True;True	363;502;745	412;604;898	651;1144;1718;1719	651;1144;1718
P48159	P48159	P48159	2	2	2	60S ribosomal protein L23	RpL23		1	2	2	2	13.6	13.6	13.6	14.936	140	140	0	11.995	4601300	4601300	2	2	101	128;452	True;True	133;467	148;562;563	229;1076;1077	229;1076
P48588	P48588	P48588	1	1	1	40S ribosomal protein S25	RpS25		1	1	1	1	8.5	8.5	8.5	13.201	117	117	0	6.6325	3318400	3318400	2	2	102	358	True	369	422	672;673	672
P48604	P48604	P48604	6	6	6	GrpE protein homolog, mitochondrial	Roe1		1	6	6	6	28.2	28.2	28.2	23.926	213	213	0	37.757	27973000	27973000	6	6	103	59;248;276;451;543;635	True;True;True;True;True;True	59;257;285;466;563;659	64;284;285;317;561;677;796	103;450;451;497;1075;1262;1467	103;450;497;1075;1262;1467
P50887	P50887	P50887	1	1	1	60S ribosomal protein L22	RpL22		1	1	1	1	6.7	6.7	6.7	30.61	299	299	0	7.0281	2199500	2199500	1	1	104	1	True	1	1	1	1
P54385	P54385;A0A0C4DHE7;Q8IMY1	P54385;A0A0C4DHE7;Q8IMY1	5;4;4	5;4;4	5;4;4	Glutamate dehydrogenase, mitochondrial;Glutamate dehydrogenase	Gdh	;;	3	5	5	5	9.3	9.3	9.3	62.536	562	562;391;404	0	31.149	19813000	19813000	4	4	105	74;193;308;508;584	True;True;True;True;True	75;201;319;528;606	82;222;361;637;729	128;349;570;1195;1358	128;349;570;1195;1358
P55828	P55828	P55828	3	3	3	40S ribosomal protein S20	RpS20		1	3	3	3	28.3	28.3	28.3	13.488	120	120	0	37.287	116730000	116730000	12	12	106	92;289;547	True;True;True	93;298;567	101;102;103;333;334;682	152;153;154;155;156;157;522;523;524;525;1268;1269	155;525;1268
P55830	P55830	P55830	7	7	7	40S ribosomal protein S3a	RpS3A		1	7	7	7	26.9	26.9	26.9	30.34	268	268	0	41.587	21534000	21534000	7	7	107	45;342;356;367;425;589;663	True;True;True;True;True;True;True	45;353;367;378;438;611;687	48;402;420;433;501;740;835	76;636;670;689;808;1376;1594	76;636;670;689;808;1376;1594
P55841	P55841	P55841	1	1	1	60S ribosomal protein L14	RpL14		1	1	1	1	7.2	7.2	7.2	19.173	166	166	0	6.7303	1797600	1797600	2	2	108	399	True	410	472	766;767	766
P92177	P92177	P92177	3	2	2	14-3-3 protein epsilon	14-3-3epsilon		1	3	2	2	11.8	8.8	8.8	29.798	262	262	0	16.997	12713000	12713000	4	4	109	255;446;722	True;False;True	264;461;747	293;555;900	461;462;1069;1721;1722	462;1069;1722
Q0E9B6	Q0E9B6;A1Z8U9	Q0E9B6;A1Z8U9	3;2	3;2	3;2	40S ribosomal protein S11	RpS11	;	2	3	3	3	21.3	21.3	21.3	18.105	155	155;154	0	17.609	6957500	6957500	3	3	110	115;121;479	True;True;True	118;125;498	131;139;600	195;214;1134	195;214;1134
X2JKU5	X2JKU5;Q24186;A0A0B4K683;Q9VFE4	X2JKU5;Q24186	3;3;1;1	3;3;1;1	3;3;1;1	40S ribosomal protein S5a	RpS5a	;	4	3	3	3	12.7	12.7	12.7	25.434	228	228;228;180;230	0	19.913	15450000	15450000	4	4	111	51;392;683	True;True;True	51;403;707	54;465;857	85;756;1643;1644	85;756;1644
Q24492	Q24492	Q24492	2	2	2	Replication protein A 70 kDa DNA-binding subunit	RpA-70		1	2	2	2	3.6	3.6	3.6	66.624	603	603	0	11.182	4659000	4659000	2	2	112	278;303	True;True	287;314	319;356	499;565	499;565
Q24560	Q24560;A1ZBL0;P61857;A0A0B4LGH1;P08841;Q9VAX7;Q8MST5;CON__ENSEMBL:ENSBTAP00000025008	Q24560;A1ZBL0;P61857;A0A0B4LGH1;P08841	17;16;11;10;10;7;7;5	17;16;11;10;10;7;7;5	17;16;11;10;10;7;7;5	Tubulin beta-1 chain;Tubulin beta-2 chain;Tubulin beta-3 chain	betaTub56D;betaTub85D;betaTub60D	;;;;	8	17	17	17	39.6	39.6	39.6	50.147	447	447;456;446;453;454;457;457;536	0	153.27	428770000	403710000	60	60	113	41;69;144;165;190;191;300;304;312;314;333;344;355;453;461;587;726	True;True;True;True;True;True;True;True;True;True;True;True;True;True;True;True;True	41;69;70;149;171;172;198;199;311;315;323;325;344;355;366;468;480;609;751	44;75;76;166;167;190;191;218;219;220;353;357;365;366;369;389;390;404;418;419;564;579;732;733;734;735;736;737;738;904	70;71;72;117;118;119;120;121;258;259;260;261;297;298;299;341;342;343;344;345;346;347;558;559;560;566;575;576;577;578;585;586;615;616;638;639;640;666;667;668;669;1078;1079;1101;1102;1361;1362;1363;1364;1365;1366;1367;1368;1369;1370;1371;1372;1373;1374;1729;1730	70;120;258;298;344;347;559;566;575;586;616;638;668;1078;1101;1371;1730	22;23	73;330
Q3YMU0	Q3YMU0	Q3YMU0	5	5	5	Protein disulfide-isomerase	ERp60		1	5	5	5	11.7	11.7	11.7	55.37	489	489	0	29.288	30121000	30121000	4	4	114	2;361;379;527;731	True;True;True;True;True	2;372;390;547;757	2;425;446;656;911	2;676;724;1223;1738	2;676;724;1223;1738
Q76NQ0	Q76NQ0	Q76NQ0	2	2	2	Dolichyl-diphosphooligosaccharide--protein glycosyltransferase subunit 1			1	2	2	2	5.2	5.2	5.2	51.709	458	458	0	12.025	6444000	6444000	2	2	115	293;643	True;True	302;667	339;805	533;1480	533;1480
Q7JXC4	Q7JXC4	Q7JXC4	2	2	2		P32		1	2	2	2	7.2	7.2	7.2	28.975	263	263	0	11.201	9038700	9038700	2	2	116	219;394	True;True	227;405	251;467	400;759	400;759
Q7JXZ2	Q7JXZ2	Q7JXZ2	3	3	3		Eip55E		1	3	3	3	9.4	9.4	9.4	42.988	393	393	0	19.231	10319000	10319000	4	4	117	411;465;607	True;True;True	422;484;629	485;584;758	784;1109;1401;1402	784;1109;1402
Q7KMQ0	Q7KMQ0	Q7KMQ0	2	2	2		Rpt1		1	2	2	2	6	6	6	48.541	433	433	0	11.181	5635300	5635300	2	2	118	176;485	True;True	183;504	202;606	312;1147	312;1147
Q7KW39	Q7KW39	Q7KW39	4	4	4	Probable methylmalonate-semialdehyde dehydrogenase [acylating], mitochondrial	CG17896		1	4	4	4	10.2	10.2	10.2	55.972	520	520	0	23.975	17870000	17870000	3	3	119	72;301;604;681	True;True;True;True	73;312;626;705	79;354;755;855	125;561;1397;1641	125;561;1397;1641
X2JF59	X2JF59;Q9V3P0	X2JF59;Q9V3P0	3;3	3;3	3;3	Peroxiredoxin 1	Jafrac1	;	2	3	3	3	17	17	17	21.738	194	194;194	0	20.146	14435000	14435000	4	4	120	224;406;487	True;True;True	232;417;506	257;479;610	408;774;775;1155	408;774;1155
Q9V3Z4	Q9V3Z4	Q9V3Z4	1	1	1		Rpn5		1	1	1	1	2	2	2	57.747	502	502	0.0068027	6.1246	1785900	1785900	1	1	121	264	True	273	302	476	476
Q9V438	Q9V438	Q9V438	1	1	1		CaBP1		1	1	1	1	2.5	2.5	2.5	46.751	433	433	0	6.6424	2506800	2506800	1	1	122	24	True	24	27	41	41
Q9V455	Q9V455	Q9V455	1	1	1	Importin subunit alpha	Kap-alpha3		1	1	1	1	3.7	3.7	3.7	56.989	514	514	0	6.6162	4538200	4538200	1	1	123	0	True	0	0	0	0
Q9V4N3	Q9V4N3	Q9V4N3	1	1	1	Cytochrome b5	Cyt-b5		1	1	1	1	6.7	6.7	6.7	15.206	134	134	0	7.0468	2282000	2282000	1	1	124	277	True	286	318	498	498
Q9V9A7	Q9V9A7	Q9V9A7	18	18	18	Probable methylcrotonoyl-CoA carboxylase beta chain, mitochondrial	l(2)04524		1	18	18	18	37.9	37.9	37.9	62.648	578	578	0	210.43	667660000	645140000	53	53	125	4;6;52;133;154;188;204;216;302;377;412;415;427;470;481;484;625;652	True;True;True;True;True;True;True;True;True;True;True;True;True;True;True;True;True;True	4;6;52;138;159;160;196;212;224;313;388;423;426;441;442;489;500;503;647;676	4;6;7;55;153;178;179;216;234;247;355;444;486;489;504;505;590;591;602;605;778;779;780;824	4;5;6;8;9;10;11;12;86;87;88;235;236;277;278;279;280;281;337;338;339;369;370;395;562;563;564;720;721;785;786;787;791;792;815;816;817;1117;1118;1137;1138;1139;1140;1141;1145;1146;1439;1440;1441;1442;1443;1578;1579	5;12;86;236;279;337;369;395;564;721;786;791;816;1117;1138;1146;1441;1578	24;25	48;440
Q9VAC4	Q9VAC4	Q9VAC4	1	1	1		Nph		1	1	1	1	4.5	4.5	4.5	17.369	156	156	0	6.4288	1078400	1078400	1	1	128	306	True	317	359	568	568
Q9VBH8	Q9VBH8;Q9VHE5	Q9VBH8;Q9VHE5	1;1	1;1	1;1		RpL34a;RpL34b	;	2	1	1	1	4.9	4.9	4.9	18.069	162	162;168	0.0067114	6.06	3633600	3633600	1	1	129	20	True	20	23	34	34
Q9VBU9	Q9VBU9	Q9VBU9	2	2	2	40S ribosomal protein S27	RpS27		1	2	2	2	22.6	22.6	22.6	9.364	84	84	0	13.26	12175000	12175000	3	3	130	97;393	True;True	98;404	108;466	164;757;758	164;758
Q9VFV9	Q9VFV9	Q9VFV9	4	4	4		Droj2		1	4	4	4	14.9	14.9	14.9	45.23	403	403	0	25.789	18302000	18302000	4	4	132	29;180;417;687	True;True;True;True	29;188;428;711	32;208;491;862	47;324;794;1651	47;324;794;1651
Q9VHL2	Q9VHL2	Q9VHL2	2	2	2		Tcp-1eta		1	2	2	2	4	4	4	59.386	544	544	0	11.041	2075200	2075200	1	1	133	285;366	True;True	294;377	327;432	510;688	510;688
Q9VJ19	Q9VJ19	Q9VJ19	2	2	2		RpL30		1	2	2	2	27.9	27.9	27.9	12.234	111	111	0	13.536	4593300	4593300	2	2	134	402;594	True;True	413;616	475;745	770;1383	770;1383
Q9VJD1	Q9VJD1	Q9VJD1	3	3	3		GCS2beta		1	3	3	3	6.8	6.8	6.8	61.539	548	548	0	17.443	5675300	5675300	3	3	135	164;170;319	True;True;True	170;177;330	189;196;374	296;304;596	296;304;596
X2JE06	X2JE06;Q9VJY6	X2JE06;Q9VJY6	1;1	1;1	1;1	60S ribosomal protein L24	RpL24	;	2	1	1	1	8.4	8.4	8.4	17.52	155	155;155	0	9.5414	3838400	3838400	1	1	136	30	True	30	33	48	48
Q9VK69	Q9VK69	Q9VK69	2	2	2	T-complex protein 1 subunit delta			1	2	2	2	3.4	3.4	3.4	57.116	533	533	0	11.107	5657100	5657100	2	2	137	400;532	True;True	411;552	473;661	768;1232	768;1232
Q9VLC5	Q9VLC5	Q9VLC5	2	2	2		Aldh		1	2	2	2	3.8	3.8	3.8	57.018	520	520	0	11.304	3020300	3020300	2	2	138	132;691	True;True	137;715	152;866	234;1657	234;1657
Q9VNA5	Q9VNA5	Q9VNA5	1	1	1	Proteasome subunit beta type-4	Prosbeta7		1	1	1	1	3	3	3	29.986	268	268	0.0065789	6.0172	1992100	1992100	1	1	139	253	True	262	290	458	458
Q9VP55	Q9VP55	Q9VP55	1	1	1		Cpr78Cb		1	1	1	1	11.4	11.4	11.4	15.894	140	140	0	6.386	228180	228180	0	0	140	320	True	331	375	597	597
Q9VPN5	Q9VPN5	Q9VPN5	3	3	3		Hop		1	3	3	3	6.3	6.3	6.3	55.697	490	490	0	16.524	6648800	6648800	2	2	141	19;138;368	True;True;True	19;143;379	22;159;434	33;247;690	33;247;690
Q9VRY0	Q9VRY0	Q9VRY0	1	1	1		eIF4E-4		1	1	1	1	4.8	4.8	4.8	26.372	229	229	0	6.5725	0	0	3	3	142	111	True	112	123;124;125	182;183;184	184
Q9VV75	Q9VV75	Q9VV75	3	3	3		UQCR-C2		1	3	3	3	9.5	9.5	9.5	45.415	440	440	0	21.849	11764000	11764000	4	4	143	5;73;639	True;True;True	5;74;663	5;80;81;801	7;126;127;1474	7;127;1474
Q9VVU2	Q9VVU2	Q9VVU2	1	1	1		RpL26		1	1	1	1	6	6	6	17.281	149	149	0	7.2023	2334300	2334300	2	2	144	246	True	255	281	444;445	445
Q9VXQ5	Q9VXQ5	Q9VXQ5	5	5	5		Tcp-1zeta		1	5	5	5	12	12	12	58.246	533	533	0	29.967	17274000	17274000	5	5	145	44;218;450;469;606	True;True;True;True;True	44;226;465;488;628	47;250;560;589;757	75;399;1074;1116;1400	75;399;1074;1116;1400
Q9VYW2	Q9VYW2	Q9VYW2	13	13	13		Met		1	13	13	13	18.7	18.7	18.7	78.692	716	716	0	95.578	104870000	104870000	18	18	146	17;174;182;208;254;282;283;416;495;496;576;613;617	True;True;True;True;True;True;True;True;True;True;True;True;True	17;181;190;216;263;291;292;427;514;515;598;635;639	18;19;200;210;238;291;292;323;324;325;490;619;620;721;764;769	26;27;310;326;374;459;460;506;507;508;793;1168;1169;1170;1346;1347;1414;1425	27;310;326;374;460;506;507;793;1169;1170;1346;1414;1425
Q9W0A8	Q9W0A8	Q9W0A8	2	2	2		RpL23A		1	2	2	2	9	9	9	29.463	277	277	0	12.605	7705300	7705300	1	1	147	120;126	True;True	124;131	138;145	213;226	213;226
Q9W1B9	Q9W1B9	Q9W1B9	2	2	2		RpL12		1	2	2	2	15.2	15.2	15.2	17.673	165	165	0	11.712	12401000	12401000	2	2	148	167;284	True;True	174;293	193;326	301;509	301;509
Q9W3C0	Q9W3C0	Q9W3C0	1	1	1	Probable U3 small nucleolar RNA-associated protein 11	CG1789		1	1	1	1	4.6	4.6	4.6	28.538	237	237	0.0068966	6.1324	51476000	51476000	2	2	149	310	True	321	363	572;573	572
X2JIQ5	X2JIQ5;Q9W3W8	X2JIQ5;Q9W3W8	1;1	1;1	1;1	60S ribosomal protein L17	RpL17	;	2	1	1	1	5.4	5.4	5.4	21.593	186	186;186	0	6.6304	2437800	2437800	1	1	150	409	True	420	483	781	781
R9Q794	R9Q794;Q9W5R8	R9Q794;Q9W5R8	2;2	2;2	2;2	60S ribosomal protein L5	RpL5	;	2	2	2	2	7	7	7	34.036	299	299;299	0	11.305	8899000	8899000	2	2	151	76;546	True;True	77;566	84;681	130;1267	130;1267
Q9Y119	Q9Y119	Q9Y119	1	1	1		Tps1		1	1	1	1	1.4	1.4	1.4	91.134	809	809	0.0066225	6.0256	224940000	224940000	2	2	152	690	True	714	865	1655;1656	1655
X2JB48	X2JB48;Q26365;O62526	X2JB48;Q26365	13;12;2	13;12;2	13;12;2	ADP,ATP carrier protein	sesB	;	3	13	13	13	40.5	40.5	40.5	32.909	299	299;312;307	0	94.323	269760000	269760000	26	26	154	8;89;90;134;156;203;221;229;462;475;503;520;717	True;True;True;True;True;True;True;True;True;True;True;True;True	8;90;91;139;162;211;229;238;481;494;522;540;742	9;98;99;154;181;233;253;254;263;580;581;596;629;649;895	14;149;150;237;238;283;284;367;368;402;403;404;416;417;1103;1104;1105;1106;1125;1185;1186;1210;1211;1212;1714;1715	14;149;150;237;284;368;404;417;1104;1125;1186;1211;1714

## Sheet: UAS-Gce-BirA +JH
LC-MS analysis of competitive eluted proteins
Leading Protein	Protein IDs	Majority protein IDs	Peptide counts (all)	Peptide counts (razor+unique)	Peptide counts (unique)	Protein names	Gene names	Fasta headers	Number of proteins	Peptides	Razor + unique peptides	Unique peptides	Sequence coverage [%]	Unique + razor sequence coverage [%]	Unique sequence coverage [%]	Mol. weight [kDa]	Sequence length	Sequence lengths	Q-value	Score	Intensity	LFQ intensity	MS/MS count	MS/MS count	id	Peptide IDs	Peptide is razor	Mod. peptide IDs	Evidence IDs	MS/MS IDs	Best MS/MS	Oxidation (M) site IDs	Oxidation (M) site positions
A0A023GQA5	A0A023GQA5;P24156	A0A023GQA5;P24156	3;3	3;3	3;3	Protein l(2)37Cc	l(2)37Cc	;	2	3	3	3	10.5	10.5	10.5	30.383	276	276;276	0	18.329	2779800	2779800	3	3	0	4;328;366	True;True;True	4;342;381	4;444;494	6;865;952	6;865;952
A0A0B4JD11	A0A0B4JD11;Q9NJH0	A0A0B4JD11;Q9NJH0	3;3	3;3	3;3	Elongation factor 1-gamma	Ef1gamma	;	2	3	3	3	7.7	7.7	7.7	48.967	431	431;431	0	19.445	11545000	11545000	3	3	1	22;278;492	True;True;True	22;286;512	26;331;656	46;526;1290	46;526;1290
A0A0B4K624	A0A0B4K624;A0A0B4K6A3;A0A0B4K6K1;A0A0B4K6T7;E1JJ68;C7LAE4;P19109	A0A0B4K624;A0A0B4K6A3;A0A0B4K6K1;A0A0B4K6T7;E1JJ68;C7LAE4;P19109	2;2;2;2;2;2;2	2;2;2;2;2;2;2	2;2;2;2;2;2;2	ATP-dependent RNA helicase p62	Rm62;Rm62-RE	;;;;;;	7	2	2	2	5	5	5	50.098	458	458;473;478;485;575;578;719	0	11.419	1499900	1499900	2	2	2	147;311	True;True	153;322	170;415	277;818	277;818
A0A0B4K6N1	A0A0B4K6N1;Q8MLY8	A0A0B4K6N1;Q8MLY8	2;2	2;2	2;2	40S ribosomal protein S8	RpS8	;	2	2	2	2	12	12	12	23.759	208	208;208	0	12.467	4537600	4537600	1	1	3	325;455	True;True	339;474	440;617	860;1230	860;1230
A0A0B4K6U6	A0A0B4K6U6;Q08473	A0A0B4K6U6;Q08473	1;1	1;1	1;1	RNA-binding protein squid	sqd	;	2	1	1	1	3.2	3.2	3.2	33.054	308	308;344	0	6.2846	6640700	6640700	1	1	4	505	True	525	671	1317	1317
A0A0B4K7G4	A0A0B4K7G4;P13469	A0A0B4K7G4;P13469	2;2	2;2	2;2	DNA-binding protein modulo	mod	;	2	2	2	2	4.8	4.8	4.8	60.309	542	542;542	0	15.821	9726500	9726500	1	1	5	444;447	True;True	463;466	600;604	1129;1137	1129;1137
A0A0B4K8A5	A0A0B4K8A5;Q9W2F2	A0A0B4K8A5;Q9W2F2	1;1	1;1	1;1	Protein mahjong	mahj	;	2	1	1	1	0.7	0.7	0.7	172.08	1544	1544;1544	0.0096154	5.9752	10219000	10219000	1	1	6	271	True	279	323	510	510
A0A0B4KEH0	A0A0B4KEH0;P29310	A0A0B4KEH0;P29310	1;1	1;1	1;1	14-3-3 protein zeta	14-3-3zeta	;	2	1	1	1	4.4	4.4	4.4	28.227	248	248;248	0.0098039	6.0917	138300000	138300000	1	1	7	508	True	528	674	1320	1320
A0A0B4KFX5	A0A0B4KFX5;A0A0B4KGG9;A4V2S3;A0A0B4KHB2;A0A0B4KFT4;A0A0B4KGZ7;O46036	A0A0B4KEH0;P29311	1;1;1;1;1;1;1	1;1;1;1;1;1;1	1;1;1;1;1;1;1	C-terminal-binding protein	CtBP	;;;;;;	7	1	1	1	2.9	2.9	2.9	41.344	379	379;383;386;473;476;481;476	0	6.5602	0	0	1	1	8	17	True	17	20	35	35
A0A0B4KFZ9	A0A0B4KFZ9;P84040	A0A0B4KEH0;P29312	7;7	7;7	7;7	Histone H4	His4r;His4	;	2	7	7	7	52.4	52.4	52.4	11.381	103	103;103	0	56.681	358590000	354290000	20	20	9	56;67;217;240;440;441;459	True;True;True;True;True;True;True	57;68;224;248;458;459;460;478	64;65;77;78;257;286;594;595;596;597;621	99;100;101;102;103;118;119;120;412;413;456;1120;1121;1122;1123;1124;1125;1234;1235;1236	103;120;413;456;1122;1125;1234	0	85
Q4AB57	Q4AB57;A0A0B4KH25;P84051;P08985	A0A0B4KEH0;P29313	2;2;2;2	2;2;2;2	2;2;2;2	Histone H2A;Histone H2A.v	His2A:CG33859;His2Av;His2A	;;;	4	2	2	2	12.9	12.9	12.9	13.364	124	124;141;124;141	0	12.093	130630000	130630000	5	5	10	14;180	True;True	14;186	17;207;208	30;31;32;328;329	32;328
A0A0B4KH34	A0A0B4KH34;P22464	A0A0B4KEH0;P29314	2;2	2;2	2;2	Annexin;Annexin B9	AnxB9	;	2	2	2	2	6.5	6.5	6.5	35.944	324	324;324	0	11.664	2298000	2298000	2	2	11	361;414	True;True	376;431	489;561	944;1070	944;1070
A0A0B4LEY6	A0A0B4LEY6;Q94518	A0A0B4KEH0;P29315	1;1	1;1	1;1	Nascent polypeptide-associated complex subunit alpha	Nacalpha	;	2	1	1	1	6.9	6.9	6.9	23.021	217	217;217	0	8.7563	5913100	5913100	1	1	12	189	True	195	219	344	344
A0A0B4LFD2	A0A0B4LFD2;P29845	A0A0B4KEH0;P29316	15;15	15;15	15;15	Heat shock 70 kDa protein cognate 5	Hsc70-5	;	2	15	15	15	22.4	22.4	22.4	74.065	686	686;686	0	100.43	95250000	95250000	19	19	13	35;50;72;114;116;251;302;308;332;351;389;435;464;467;481	True;True;True;True;True;True;True;True;True;True;True;True;True;True;True	35;51;73;118;120;259;311;319;346;366;405;453;483;486;500	40;58;83;132;134;298;369;412;450;476;524;588;589;626;629;644	67;93;127;218;220;475;476;585;815;874;922;923;1007;1008;1112;1113;1244;1248;1268	67;93;127;218;220;475;585;815;874;923;1008;1113;1244;1248;1268
A0A0B4LFZ4	A0A0B4LFZ4;Q7KN62	A0A0B4KEH0;P29317	2;2	2;2	2;2	Transitional endoplasmic reticulum ATPase TER94	TER94	;	2	2	2	2	2.4	2.4	2.4	91.923	825	825;801	0	11.095	5206800	5206800	1	1	14	95;298	True;True	98;306	110;364	179;577	179;577
A0A0B4LJ12	A0A0B4LJ12;A0A0B4LHX6;P08879	A0A0B4KEH0;P29318	1;1;1	1;1;1	1;1;1	Nucleoside diphosphate kinase	awd	;;	3	1	1	1	6.5	6.5	6.5	17.17	153	153;168;153	0.0095238	5.9566	3226200	3226200	2	2	15	108	True	111	125	203;204	204
A0A0B4LIJ0	A0A0B4LIJ0;P48601	A0A0B4KEH0;P29319	2;2	2;2	2;2	26S protease regulatory subunit 4	Rpt2	;	2	2	2	2	4.8	4.8	4.8	49.323	439	439;439	0	11.822	2541300	2541300	2	2	16	36;487	True;True	36;507	41;651	68;1282	68;1282
A1Z6M6	A1Z6M6	A0A0B4KEH0;P29320	2	2	2		Dpit47		1	2	2	2	4.8	4.8	4.8	46.906	396	396	0	12.27	10851000	10851000	2	2	17	57;456	True;True	58;475	66;618	104;1231	104;1231
Q7JV23	Q7JV23;A8DY67;A1Z784	A0A0B4KEH0;P29321	6;6;6	6;6;6	6;6;6		ACC	;;	3	6	6	6	2.8	2.8	2.8	261.92	2323	2323;2348;2482	0	35.477	18635000	18635000	8	8	18	28;53;85;93;103;127	True;True;True;True;True;True	28;54;88;96;106;132	32;61;99;108;119;147	55;96;156;157;175;176;193;237	55;96;156;175;193;237
A1Z9E3	A1Z9E3	A0A0B4KEH0;P29322	1	1	1	Elongation factor Tu	EfTuM		1	1	1	1	1.8	1.8	1.8	53.992	489	489	0.0097087	6.0082	4956100	4956100	1	1	19	434	True	452	587	1111	1111
A4V2K7	A4V2K7;P22058	A0A0B4KEH0;P29323	1;1	1;1	1;1	Chromosomal protein D1	D1	;	2	1	1	1	4.5	4.5	4.5	37	355	355;355	0	7.4052	3446100	3446100	1	1	20	372	True	387	500	960	960
A4V303	A4V303;P48605	A0A0B4KEH0;P29324	3;3	3;3	3;3	T-complex protein 1 subunit gamma	Cctgamma	;	2	3	3	3	5.7	5.7	5.7	59.394	544	544;544	0	18.136	9926800	9926800	4	4	21	188;318;418	True;True;True	194;330;435	218;428;565	343;842;1074;1075	343;842;1075
A4V391	A4V391;P12613	A0A0B4KEH0;P29325	6;6	6;6	6;6	T-complex protein 1 subunit alpha	T-cp1	;	2	6	6	6	11.8	11.8	11.8	59.556	557	557;557	0	37.7	23273000	23273000	7	7	22	55;111;267;393;396;507	True;True;True;True;True;True	56;115;275;409;412;527	63;129;319;529;533;673	98;213;214;505;1021;1027;1319	98;213;505;1021;1027;1319
Q0E924	Q0E924;A8DYI7;A8DYI6	A0A0B4KEH0;P29326	1;1;1	1;1;1	1;1;1		Phb2	;;	3	1	1	1	4	4	4	33.066	299	299;303;338	0	10.146	4758900	4758900	1	1	23	223	True	231	264	423	423
B5RJQ0	B5RJQ0;Q95028	A0A0B4KEH0;P29327	1;1	1;1	1;1	L-lactate dehydrogenase	ImpL3	;	2	1	1	1	3.6	3.6	3.6	35.537	332	332;332	0	7.8201	5663700	5663700	1	1	24	465	True	484	627	1245	1245
C0HL67	C0HL67;C0HL66;P02299	A0A0B4KEH0;P29328	2;2;2	2;2;2	2;2;2	Histone H3	His3	;;	3	2	2	2	10.3	10.3	10.3	15.328	136	136;136;136	0	11.134	55084000	55084000	3	3	25	94;395	True;True	97;411	109;532	177;178;1026	177;1026
C7LA75	C7LA75;P11147;P29843	A0A0B4KEH0;P29329	22;22;1	22;22;1	17;17;0	Heat shock 70 kDa protein cognate 4	Hsc70-4-RA;Hsc70-4	;	3	22	22	17	38.4	38.4	30	71.131	651	651;651;641	0	184.37	463650000	459550000	47	47	26	31;34;51;104;115;124;125;185;191;203;230;270;293;301;324;394;398;403;436;442;454;493	True;True;True;True;True;True;True;True;True;True;True;True;True;True;True;True;True;True;True;True;True;True	31;34;52;107;119;129;130;191;197;209;238;278;301;310;338;410;414;420;454;461;473;513	35;36;39;59;120;133;143;144;145;213;221;222;236;237;272;322;356;357;368;439;530;531;536;543;544;590;598;616;657;658	60;61;62;66;94;194;195;219;232;233;234;235;335;336;349;350;375;376;377;434;435;509;560;561;562;563;584;858;859;1022;1023;1024;1025;1032;1042;1043;1044;1114;1126;1127;1227;1228;1229;1291;1292;1293;1294	62;66;94;195;219;233;235;335;349;377;435;509;562;584;858;1023;1032;1043;1114;1126;1228;1291
C9QP42	C9QP42;Q02748	A0A0B4KEH0;P29330	8;8	8;8	8;8	Eukaryotic initiation factor 4A	eIF-4a	;	2	8	8	8	22.6	22.6	22.6	45.878	403	403;403	0	57.069	57205000	57205000	12	12	27	16;86;102;162;207;228;231;472	True;True;True;True;True;True;True;True	16;89;105;168;214;236;239;491	19;100;118;185;245;246;270;273;635	34;158;159;191;192;297;389;390;391;432;436;1255	34;159;192;297;389;432;436;1255
F3YDH0	F3YDH0;P29844	A0A0B4KEH0;P29331	11;11	7;7	7;7	Heat shock 70 kDa protein cognate 3	Hsc70-3	;	2	11	7	7	19.1	13.1	13.1	72.26	656	656;656	0	46.071	41594000	41594000	7	7	48	52;64;78;115;203;220;222;301;309;323;454	True;True;True;False;False;True;True;False;True;True;False	53;65;80;119;209;227;230;310;320;337;473	60;74;90;133;236;237;260;263;368;413;438;616	95;115;141;219;375;376;377;417;422;584;816;857;1227;1228;1229	95;115;141;219;377;417;422;584;816;857;1228
G3M3A2	G3M3A2;Q06559	A0A0B4KEH0;P29332	7;7	7;7	7;7	40S ribosomal protein S3	RpS3	;	2	7	7	7	32.9	32.9	32.9	27.471	246	246;246	0	43.937	53610000	53610000	6	6	49	101;148;164;212;225;236;410	True;True;True;True;True;True;True	104;154;170;219;233;244;427	117;171;188;251;266;280;557	190;278;300;399;426;447;1066	190;278;300;399;426;447;1066
X2JH42	X2JH42;L0MQ04;Q05825;Q8T4C4	A0A0B4KEH0;P29333	5;5;5;2	5;5;5;2	5;5;5;2	ATP synthase subunit beta;ATP synthase subunit beta, mitochondrial	ATPsynbeta;ATPsyn-beta	;;	4	5	5	5	12.3	12.3	12.3	54.107	505	505;511;505;622	0	31.195	19505000	19505000	5	5	50	141;194;290;413;486	True;True;True;True;True	147;200;298;430;506	164;225;353;560;650	268;355;356;557;1069;1281	268;356;557;1069;1281
X2JDP6	X2JDP6;M9MRG2;Q8T079	A0A0B4KEH0;P29334	8;8;8	8;8;8	8;8;8	Putative oxidoreductase GLYR1 homolog	CG4747	;;	3	8	8	8	14.5	14.5	14.5	65.251	602	602;603;602	0	48.65	47898000	47898000	11	11	51	46;65;149;175;255;356;402;510	True;True;True;True;True;True;True;True	47;66;155;181;263;371;419;530	54;75;172;201;305;481;482;542;676	87;116;279;317;318;488;489;930;931;1041;1323	87;116;279;318;488;931;1041;1323
X2JFA0	X2JFA0;M9MS55	A0A0B4KEH0;P29335	1;1	1;1	1;1		AMPdeam	;	2	1	1	1	0.9	0.9	0.9	90.72	786	786;789	0	6.6569	1767500	1767500	0	0	52	120	True	125	139	226	226
M9ND19	M9ND19;Q9W0P5	A0A0B4KEH0;P29336	2;2	2;2	2;2	UDP-glucose 4-epimerase	Gale	;	2	2	2	2	6.3	6.3	6.3	38.696	350	350;350	0	11.598	4597500	4597500	2	2	53	451;503	True;True	470;523	613;669	1224;1315	1224;1315
M9NE89	M9NE89;P08928	A0A0B4KEH0;P29337	2;2	2;2	2;2	Lamin Dm0	Lam	;	2	2	2	2	3.4	3.4	3.4	71.299	622	622;622	0	11.68	914220	914220	2	2	54	70;288	True;True	71;296	81;351	124;555	124;555
M9PBL3	M9PBL3;P02828	A0A0B4KEH0;P29338	18;18	18;18	18;18	Heat shock protein 83	Hsp83	;	2	18	18	18	25.2	25.2	25.2	81.864	717	717;717	0	122.56	159070000	159070000	25	25	55	8;23;71;87;92;106;107;142;182;184;342;354;383;407;422;426;502;514	True;True;True;True;True;True;True;True;True;True;True;True;True;True;True;True;True;True	8;23;72;90;95;109;110;148;188;190;356;369;398;424;439;443;522;534	9;27;82;101;107;122;123;124;165;210;212;462;479;514;548;569;575;668;680	16;47;48;125;126;160;161;173;174;199;200;201;202;269;331;333;334;897;928;991;1050;1082;1092;1314;1331	16;47;126;160;173;200;201;269;331;334;897;928;991;1050;1082;1092;1314;1331
M9PC90	M9PC90;Q27268	A0A0B4KEH0;P29339	1;1	1;1	1;1	ATP-dependent RNA helicase WM6	Hel25E	;	2	1	1	1	2.3	2.3	2.3	34.647	305	305;424	0	8.1227	0	0	1	1	56	80	True	82	92	145	145
M9PCC1	M9PCC1;O18640;M9PB67	A0A0B4KEH0;P29340	6;6;1	6;6;1	6;6;1	Guanine nucleotide-binding protein subunit beta-like protein	Rack1	;	3	6	6	6	21.7	21.7	21.7	35.618	318	318;318;109	0	38.355	30801000	30801000	8	8	57	24;68;137;296;438;490	True;True;True;True;True;True	24;69;143;304;456;510	28;79;160;362;592;654	49;50;121;261;573;1117;1118;1285	49;121;261;573;1118;1285
M9PD75	M9PD75;Q94920	A0A0B4KEH0;P29341	1;1	1;1	1;1	Voltage-dependent anion-selective channel	porin	;	2	1	1	1	5	5	5	30.55	282	282;282	0	7.0211	3020100	3020100	1	1	58	475	True	494	638	1258	1258
M9PG76	M9PG76;P19889	A0A0B4KEH0;P29342	2;2	2;2	2;2	60S acidic ribosomal protein P0	RpLP0	;	2	2	2	2	9.5	9.5	9.5	34.202	317	317;317	0	13.124	9384800	9384800	2	2	59	122;159	True;True	127;165	141;182	228;294	228;294
M9PJN8	M9PJN8;P07487;P07486;Q7JY07	A0A0B4KEH0;P29343	4;4;3;1	4;4;3;1	4;4;3;1	Glyceraldehyde-3-phosphate dehydrogenase;Glyceraldehyde-3-phosphate dehydrogenase 2;Glyceraldehyde-3-phosphate dehydrogenase 1	Gapdh2;Gapdh1	;;	4	4	4	4	16	16	16	35.369	332	332;332;332;343	0	30.359	36631000	36631000	5	5	60	143;287;479;488	True;True;True;True	149;295;498;508	166;350;642;652	270;554;1263;1264;1283	270;554;1264;1283
O02649	O02649;Q9VMN5	A0A0B4KEH0;P29344	7;2	7;2	7;2	60 kDa heat shock protein, mitochondrial	Hsp60		2	7	7	7	12.7	12.7	12.7	60.808	573	573;576	0	45.968	37599000	37599000	8	8	61	195;245;248;254;306;327;462	True;True;True;True;True;True;True	201;253;256;262;317;341;481	226;292;295;304;375;443;624	357;466;467;471;487;596;864;1242	357;467;471;487;596;864;1242
O62619	O62619	A0A0B4KEH0;P29345	3	3	3	Pyruvate kinase	PyK		1	3	3	3	5.6	5.6	5.6	57.44	533	533	0	18.06	15840000	15840000	5	5	62	45;150;279	True;True;True	46;156;287	53;173;332;333	86;280;527;528;529	86;280;529
O97125	O97125;Q9VG58;Q9BIS2;Q9BIR7;Q8INI8;P82910;P02825;P11146	A0A0B4KEH0;P29346	3;3;3;3;3;3;3;2	1;1;1;1;1;1;1;1	1;1;1;1;1;1;1;1	Heat shock protein 68;Major heat shock 70 kDa protein Bbb;Major heat shock 70 kDa protein Bb;Major heat shock 70 kDa protein Bc;Major heat shock 70 kDa protein Ba;Major heat shock 70 kDa protein Aa;Major heat shock 70 kDa protein Ab;Heat shock 70 kDa protein cognate 2	Hsp68;Hsp70Bbb;Hsp70Bb;Hsp70Bc;Hsp70Ba;Hsp70Aa;Hsp70Ab;Hsc70-2	;;;;;;;	8	3	1	1	6.8	2.5	2.5	69.743	635	635;641;641;641;641;642;642;633	0	7.2947	7080700	7080700	2	2	63	204;394;454	True;False;False	210;410;473	238;239;530;531;616	378;379;1022;1023;1024;1025;1227;1228;1229	379;1023;1228
P02283	P02283	A0A0B4KEH0;P29347	5	5	5	Histone H2B	His2B		1	5	5	5	30.1	30.1	30.1	13.696	123	123	0	30.776	162100000	162100000	12	12	64	97;113;229;268;349	True;True;True;True;True	100;117;237;276;363	112;131;271;320;472;473	181;182;183;216;217;433;506;507;913;914;915;916	183;216;433;507;915
P06605	P06605;P06603;P06604	A0A0B4KEH0;P29348	9;9;5	9;9;5	9;9;5	Tubulin alpha-3 chain;Tubulin alpha-1 chain;Tubulin alpha-2 chain	alphaTub84D;alphaTub84B;alphaTub85E	;;	3	9	9	9	24.2	24.2	24.2	49.89	450	450;450;449	0	70.503	194120000	194120000	18	18	65	79;99;197;286;317;343;415;463;513	True;True;True;True;True;True;True;True;True	81;102;203;294;329;357;432;482;533	91;114;228;349;426;427;463;464;562;625;679	142;143;144;186;187;359;360;361;553;838;839;840;841;898;899;1071;1243;1330	144;187;360;553;840;899;1071;1243;1330
P08736	P08736;A4V3Q6;P05303	A0A0B4KEH0;P29349	5;4;4	5;4;4	5;4;4	Elongation factor 1-alpha 1;Elongation factor 1-alpha;Elongation factor 1-alpha 2	Ef1alpha48D;Ef1alpha100E	;;	3	5	5	5	11.4	11.4	11.4	50.306	463	463;462;462	0	41.451	408120000	403790000	17	17	66	193;277;299;401;516	True;True;True;True;True	199;285;307;308;418;536	224;330;365;366;540;541;682;683	352;353;354;524;525;578;579;580;581;582;1038;1039;1040;1334;1335;1336;1337	352;524;580;1038;1334	12	155
X2JCP8	X2JCP8;P10987;P02572;A0A0B4LH50;P83967;P53501;P10981;M9PFZ6;P02574;P45891	A0A0B4KEH0;P29350	13;13;12;11;11;11;11;8;8;2	13;13;12;11;11;11;11;8;8;2	13;13;12;11;11;11;11;8;8;2	Actin-5C;Actin-42A;Actin, indirect flight muscle;Actin-57B;Actin-87E;Actin, larval muscle	Act5C;Act42A;Act87E;Act88F;Act57B;Act79B	;;;;;;;;	10	13	13	13	35.4	35.4	35.4	41.821	376	376;376;376;376;376;376;376;376;376;376	0	91.807	234920000	234920000	25	25	67	12;37;66;73;74;98;174;181;198;335;352;404;446	True;True;True;True;True;True;True;True;True;True;True;True;True	12;37;67;74;75;101;180;187;204;349;367;421;465	14;42;43;76;84;85;113;200;209;229;453;454;477;545;602;603	26;27;69;70;71;72;117;128;129;184;185;315;316;330;362;363;877;878;879;924;1045;1133;1134;1135;1136	27;71;117;128;129;184;315;330;362;879;924;1045;1135
P13060	P13060	A0A0B4KEH0;P29351	1	1	1	Elongation factor 2	EF2		1	1	1	1	1.1	1.1	1.1	94.458	844	844	0	6.1858	3232000	3232000	1	1	68	474	True	493	637	1257	1257
Q95TP9	Q95TP9;P29327	A0A0B4KEH0;P29352	2;2	2;2	2;2	40S ribosomal protein S6	RpS6	;	2	2	2	2	9.7	9.7	9.7	24.696	217	217;248	0	11.61	6126700	6126700	2	2	69	63;258	True;True	64;266	73;308	114;492	114;492
P35381	P35381	A0A0B4KEH0;P29353	6	6	6	ATP synthase subunit alpha, mitochondrial	blw		1	6	6	6	12.7	12.7	12.7	59.421	552	552	0	40.945	36795000	36795000	10	10	70	60;84;408;430;473;484	True;True;True;True;True;True	61;87;425;447;492;504	69;97;98;549;580;636;648	107;154;155;1051;1052;1099;1100;1256;1277;1278	107;154;1051;1100;1256;1278
P38979	P38979	A0A0B4KEH0;P29354	2	2	2	40S ribosomal protein SA	sta		1	2	2	2	9.6	9.6	9.6	30.228	270	270	0	13.215	10227000	10227000	2	2	71	140;506	True;True	146;526	163;672	266;267;1318	267;1318
P41094	P41094	A0A0B4KEH0;P29355	3	3	3	40S ribosomal protein S18	RpS18		1	3	3	3	21.1	21.1	21.1	17.611	152	152	0	17.78	16112000	16112000	3	3	72	478;489;515	True;True;True	497;509;535	641;653;681	1262;1284;1332;1333	1262;1284;1332
X2JFR6	X2JFR6;P41374	A0A0B4KEH0;P29356	1;1	1;1	1;1	Eukaryotic translation initiation factor 2 subunit 1	eIF-2alpha	;	2	1	1	1	2.9	2.9	2.9	38.645	341	341;341	0	6.1813	2622700	2622700	2	2	73	20	True	20	23;24	43;44	44
P48604	P48604	A0A0B4KEH0;P29357	3	3	3	GrpE protein homolog, mitochondrial	Roe1		1	3	3	3	15	15	15	23.926	213	213	0	17.558	13325000	13325000	2	2	74	33;179;439	True;True;True	33;185;457	38;206;593	65;327;1119	65;327;1119
P54397	P54397	A0A0B4KEH0;P29358	4	4	4	39 kDa FK506-binding nuclear protein	FK506-bp1		1	4	4	4	12.3	12.3	12.3	39.343	357	357	0	23.795	23546000	23546000	5	5	75	173;337;367;468	True;True;True;True	179;351;382;487	199;456;495;630;631	314;883;953;1249;1250	314;883;953;1249
P55828	P55828	A0A0B4KEH0;P29359	3	3	3	40S ribosomal protein S20	RpS20		1	3	3	3	28.3	28.3	28.3	13.488	120	120	0	30.527	89521000	89521000	11	11	76	62;199;379	True;True;True	63;205;394	71;72;230;231;510	109;110;111;112;113;364;365;366;367;980;981	112;367;980
P55830	P55830	A0A0B4KEH0;P29360	5	5	5	40S ribosomal protein S3a	RpS3A		1	5	5	5	20.1	20.1	20.1	30.34	268	268	0	29.818	15161000	15161000	5	5	77	244;257;266;303;458	True;True;True;True;True	252;265;274;312;477	291;307;318;370;620	465;491;504;586;1233	465;491;504;586;1233
X2JKU5	X2JKU5;Q24186	A0A0B4KEH0;P29361	1;1	1;1	1;1	40S ribosomal protein S5a	RpS5a	;	2	1	1	1	5.7	5.7	5.7	25.434	228	228;228	0	7.2569	5007800	5007800	2	2	78	476	True	495	639	1259;1260	1260
Q24492	Q24492	A0A0B4KEH0;P29362	4	4	4	Replication protein A 70 kDa DNA-binding subunit	RpA-70		1	4	4	4	7	7	7	66.624	603	603	0	24.264	23065000	23065000	6	6	79	6;192;210;485	True;True;True;True	6;198;217;505	7;223;249;649	12;13;351;397;1279;1280	13;351;397;1279
Q24560	Q24560;A1ZBL0;P61857;A0A0B4LGH1;P08841;Q9VAX7;Q8MST5;CON__ENSEMBL:ENSBTAP00000025008	A0A0B4KEH0;P29363	14;13;10;8;8;4;4;4	14;13;10;8;8;4;4;4	14;13;10;8;8;4;4;4	Tubulin beta-1 chain;Tubulin beta-2 chain;Tubulin beta-3 chain	betaTub56D;betaTub85D;betaTub60D	;;;;	8	14	14	14	34.2	34.2	34.2	50.147	447	447;456;446;453;454;457;457;536	0	102.82	285540000	259620000	41	41	80	25;39;100;119;135;208;211;215;232;247;256;320;409;512	True;True;True;True;True;True;True;True;True;True;True;True;True;True	25;39;40;103;123;124;141;215;218;222;240;255;264;332;426;532	29;45;46;115;116;137;138;157;158;247;250;254;274;275;294;306;430;550;551;552;553;554;555;556;678	51;76;77;78;79;188;189;224;225;254;255;256;257;258;259;392;393;398;403;404;405;437;438;469;470;490;844;1053;1054;1055;1056;1057;1058;1059;1060;1061;1062;1063;1064;1065;1328;1329	51;78;188;225;255;392;398;404;437;470;490;844;1065;1328	13;14	73;330
Q3YMU0	Q3YMU0	A0A0B4KEH0;P29364	2	2	2	Protein disulfide-isomerase	ERp60		1	2	2	2	4.9	4.9	4.9	55.37	489	489	0	12.477	11276000	11276000	3	3	81	260;364	True;True	268;379	311;492	495;947;948	495;947
Q76NQ0	Q76NQ0	A0A0B4KEH0;P29365	3	3	3	Dolichyl-diphosphooligosaccharide--protein glycosyltransferase subunit 1			1	3	3	3	6.6	6.6	6.6	51.709	458	458	0	17.442	5430000	5430000	2	2	82	161;202;285	True;True;True	167;208;293	184;235;348	296;374;552	296;374;552
Q7KW39	Q7KW39	A0A0B4KEH0;P29366	2	2	2	Probable methylmalonate-semialdehyde dehydrogenase [acylating], mitochondrial	CG17896		1	2	2	2	4.4	4.4	4.4	55.972	520	520	0	12.06	11029000	11029000	2	2	84	41;417	True;True	42;434	48;564	81;1073	81;1073
Q9V434	Q9V434	A0A0B4KEH0;P29367	1	1	1		Aats-asn		1	1	1	1	1.3	1.3	1.3	63.931	558	558	0	6.2496	0	0	1	1	85	118	True	122	136	223	223
Q9V455	Q9V455	A0A0B4KEH0;P29368	1	1	1	Importin subunit alpha	Kap-alpha3		1	1	1	1	3.7	3.7	3.7	56.989	514	514	0	6.3481	2285700	2285700	1	1	86	0	True	0	0	0	0
Q9V9A7	Q9V9A7	A0A0B4KEH0;P29369	21	21	21	Probable methylcrotonoyl-CoA carboxylase beta chain, mitochondrial	l(2)04524		1	21	21	21	38.8	38.8	38.8	62.648	578	578	0	213.64	1478100000	1420700000	70	70	87	3;5;13;29;88;109;133;146;158;209;234;237;276;295;297;305;310;331;338;431;449	True;True;True;True;True;True;True;True;True;True;True;True;True;True;True;True;True;True;True;True;True	3;5;13;29;91;112;113;138;139;152;164;216;242;245;284;303;305;315;316;321;345;352;448;468	3;5;6;15;16;33;102;126;127;154;155;169;181;248;277;281;282;329;359;360;361;363;373;374;414;447;448;449;457;581;582;583;611	4;5;7;8;9;10;11;28;29;56;57;162;163;205;206;207;208;209;210;248;249;250;251;252;275;276;293;394;395;396;441;442;448;449;450;451;523;566;567;568;569;570;571;572;574;575;576;590;591;592;593;594;595;817;869;870;871;872;873;884;885;886;887;888;1101;1102;1103;1104;1220;1221	5;11;28;57;163;208;250;275;293;395;442;450;523;569;576;593;817;873;886;1102;1221	15;16;17	48;440;479
Q9V9W2	Q9V9W2;Q9V9W3	A0A0B4KEH0;P29370	2;2	2;2	2;2		RpL6	;	2	2	2	2	8.6	8.6	8.6	27.697	243	243;262	0	11.539	5185900	5185900	2	2	89	411;477	True;True	428;496	558;640	1067;1261	1067;1261
Q9VEX6	Q9VEX6	A0A0B4KEH0;P29371	2	2	2		bor		1	2	2	2	2.6	2.6	2.6	68.36	604	604	0	11.666	4135300	4135300	1	1	90	2;264	True;True	2;272	2;315	3;501	3;501
Q9VFT4	Q9VFT4	A0A0B4KEH0;P29372	1	1	1		rin		1	1	1	1	1.2	1.2	1.2	74.942	690	690	0.009434	5.9549	1851200	1851200	1	1	91	128	True	133	148	238	238
Q9VHL2	Q9VHL2	A0A0B4KEH0;P29373	3	3	3		Tcp-1eta		1	3	3	3	6.1	6.1	6.1	59.386	544	544	0	18.505	5932400	5932400	2	2	93	134;196;265	True;True;True	140;202;273	156;227;316;317	253;358;502;503	253;358;503
Q9VJ19	Q9VJ19	A0A0B4KEH0;P29374	1	1	1		RpL30		1	1	1	1	10.8	10.8	10.8	12.234	111	111	0	6.3423	1448800	1448800	1	1	94	291	True	299	354	558	558
Q9VJC6	Q9VJC6	A0A0B4KEH0;P29375	1	1	1		Dhc36C		1	1	1	1	0.3	0.3	0.3	461.15	4024	4024	0.009901	6.1514	91577000	48622000	8	8	95	358	True	373	484;485;486	933;934;935;936;937;938;939;940	937
Q9VJD1	Q9VJD1	A0A0B4KEH0;P29376	2	2	2		GCS2beta		1	2	2	2	4.4	4.4	4.4	61.539	548	548	0	11.474	3449500	3449500	2	2	96	11;121	True;True	11;126	13;140	25;227	25;227
Q9VQ26	Q9VQ26	A0A0B4KEH0;P29377	1	1	1	Rab3 GTPase-activating protein catalytic subunit	CG31935		1	1	1	1	1.3	1.3	1.3	104.43	916	916	0.0093458	5.9515	33194000	33194000	3	3	97	38	True	38	44	73;74;75	75
Q9VV75	Q9VV75	A0A0B4KEH0;P29378	2	2	2		UQCR-C2		1	2	2	2	6.8	6.8	6.8	45.415	440	440	0	15.913	8314300	8314300	3	3	98	42;443	True;True	43;462	49;50;599	82;83;1128	83;1128
Q9VVU2	Q9VVU2	A0A0B4KEH0;P29379	1	1	1		RpL26		1	1	1	1	6	6	6	17.281	149	149	0	6.5346	903610	903610	1	1	99	177	True	183	203	320	320
Q9VXQ5	Q9VXQ5	A0A0B4KEH0;P29380	4	4	4		Tcp-1zeta		1	4	4	4	8.6	8.6	8.6	58.246	533	533	0	22.841	12144000	12144000	4	4	101	26;43;160;330	True;True;True;True	26;44;166;344	30;51;183;446	52;84;295;868	52;84;295;868
Q9VXW7	Q9VXW7	A0A0B4KEH0;P29381	3	3	3		gce		1	3	3	3	4	4	4	105.84	959	959	0	20.343	10920000	10920000	3	3	102	319;360;388	True;True;True	331;375;404	429;488;523	843;943;1006	843;943;1006
Q9W1V3	Q9W1V3	A0A0B4KEH0;P29382	1	1	1	rRNA 2-O-methyltransferase fibrillarin	Fib		1	1	1	1	3.2	3.2	3.2	34.636	344	344	0	6.8022	0	0	2	2	103	425	True	442	573;574	1090;1091	1091
Q9W3C0	Q9W3C0	A0A0B4KEH0;P29383	1	1	1	Probable U3 small nucleolar RNA-associated protein 11	CG1789		1	1	1	1	4.6	4.6	4.6	28.538	237	237	0	6.538	43710000	43710000	2	2	104	214	True	221	253	401;402	401
R9Q794	R9Q794;Q9W5R8	A0A0B4KEH0;P29384	1;1	1;1	1;1	60S ribosomal protein L5	RpL5	;	2	1	1	1	4	4	4	34.036	299	299;299	0.01	6.1593	6853000	6853000	2	2	105	378	True	393	508;509	978;979	979
X2JB48	X2JB48;Q26365;O62526	A0A0B4KEH0;P29385	13;12;2	13;12;2	13;12;2	ADP,ATP carrier protein	sesB	;	3	13	13	13	40.8	40.8	40.8	32.909	299	299;312;307	0	84.216	254140000	254140000	22	22	107	7;58;59;89;110;145;163;166;269;326;348;359;504	True;True;True;True;True;True;True;True;True;True;True;True;True	7;59;60;92;114;151;169;172;277;340;362;374;524	8;67;68;103;128;168;186;187;191;321;441;442;471;487;670	14;15;105;106;164;165;211;212;273;274;298;299;303;304;508;861;862;863;912;941;942;1316	14;105;106;164;212;273;299;304;508;863;912;941;1316
LC-MS analysis of boiling eluted proteins
Leading Protein	Protein IDs	Majority protein IDs	Peptide counts (all)	Peptide counts (razor+unique)	Peptide counts (unique)	Protein names	Gene names	Fasta headers	Number of proteins	Peptides	Razor + unique peptides	Unique peptides	Sequence coverage [%]	Unique + razor sequence coverage [%]	Unique sequence coverage [%]	Mol. weight [kDa]	Sequence length	Sequence lengths	Q-value	Score	Intensity	LFQ intensity	MS/MS count	MS/MS count	id	Peptide IDs	Peptide is razor	Mod. peptide IDs	Evidence IDs	MS/MS IDs	Best MS/MS	Oxidation (M) site IDs	Oxidation (M) site positions
A0A023GQA5	A0A023GQA5;P24156	A0A023GQA5;P24156	7;7	7;7	7;7	Protein l(2)37Cc	l(2)37Cc	;	2	7	7	7	28.3	28.3	28.3	30.383	276	276;276	0	62.99	28080000	28080000	9	9	0	6;82;372;405;665;836;860	True;True;True;True;True;True;True	6;84;383;418;685;857;881	6;96;449;488;843;1066;1094	8;144;718;779;1521;1522;1922;1923;1958	8;144;718;779;1521;1922;1958
A0A0B4JD11	A0A0B4JD11;Q9NJH0	A0A0B4JD11;Q9NJH0	4;4	4;4	4;4	Elongation factor 1-gamma	Ef1gamma	;	2	4	4	4	9.5	9.5	9.5	48.967	431	431;431	0	29.927	29042000	29042000	3	3	1	42;489;649;874	True;True;True;True	42;504;669;896	45;595;824;1110	64;958;1490;1983	64;958;1490;1983
Q9VNF8	Q9VNF8;A0A0B4K6T4;A0A0B4K5Z8	Q9VNF8;A0A0B4K6T4;A0A0B4K5Z8	4;4;4	4;4;4	4;4;4		Sec23	;;	3	4	4	4	7.2	7.2	7.2	86.801	773	773;780;781	0	32.282	15457000	15457000	5	5	2	18;33;190;250	True;True;True;True	18;33;197;259	19;36;228;298	28;51;52;357;482	28;51;357;482
A0A0B4K6N1	A0A0B4K6N1;Q8MLY8	A0A0B4K6N1;Q8MLY8	2;2	2;2	2;2	40S ribosomal protein S8	RpS8	;	2	2	2	2	12	12	12	23.759	208	208;208	0	14.314	6927900	6927900	2	2	3	581;815	True;True	600;836	736;1043	1360;1884	1360;1884
A0A0B4K6U6	A0A0B4K6U6;Q08473	A0A0B4K6U6;Q08473	1;1	1;1	1;1	RNA-binding protein squid	sqd	;	2	1	1	1	3.2	3.2	3.2	33.054	308	308;344	0	6.439	6332900	6332900	2	2	4	896	True	918	1137	2035;2036	2035
A0A0B4K8A5	A0A0B4K8A5;Q9W2F2	A0A0B4K8A5;Q9W2F2	1;1	1;1	1;1	Protein mahjong	mahj	;	2	1	1	1	0.7	0.7	0.7	172.08	1544	1544;1544	0	6.6948	18414000	18414000	2	2	5	480	True	495	582	930;931	931
A0A0B4KF92	A0A0B4KF92;A0A0B4LGS6;Q9VNC3;A0A0B4LGM5	A0A0B4KF92;A0A0B4LGS6;Q9VNC3;A0A0B4LGM5	1;1;1;1	1;1;1;1	1;1;1;1		Hcs	;;;	4	1	1	1	1.1	1.1	1.1	110.35	993	993;999;1041;1047	0.005848	5.9163	2457000	2457000	1	1	6	432	True	445	523	836	836
A0A0B4KFZ9	A0A0B4KFZ9;P84040	A0A0B4KFZ9;P84040	5;5	5;5	5;5	Histone H4	His4r;His4	;	2	5	5	5	51.5	51.5	51.5	11.381	103	103;103	0	35.204	87195000	87195000	7	7	7	97;118;386;791;821	True;True;True;True;True	99;120;398;812;842	113;138;466;1006;1007;1050	169;202;746;1807;1808;1894;1895	169;202;746;1808;1894
A0A0B4KGP8	A0A0B4KGP8;Q24208	A0A0B4KGP8;Q24208	2;2	2;2	2;2	Eukaryotic translation initiation factor 2 subunit 3	eIF-2gamma	;	2	2	2	2	5.5	5.5	5.5	51.484	475	475;475	0	11.104	6670000	6670000	2	2	8	462;663	True;True	477;683	559;841	895;1517	895;1517
A0A0B4KGU4	A0A0B4KGU4;Q9VHP0;A0A0B4K624;Q7KU78;A0A0B4K6A3;A0A0B4K6K1;A0A0B4K6T7;E1JJ68;C7LAE4;Q7K4L8;Q8MZI3;Q9W3M7;P19109	A0A0B4KGU4;Q9VHP0;A0A0B4K624;Q7KU78;A0A0B4K6A3;A0A0B4K6K1;A0A0B4K6T7;E1JJ68;C7LAE4;Q7K4L8;Q8MZI3;Q9W3M7;P19109	2;2;1;1;1;1;1;1;1;1;1;1;1	2;2;1;1;1;1;1;1;1;1;1;1;1	2;2;1;1;1;1;1;1;1;1;1;1;1	ATP-dependent RNA helicase bel;ATP-dependent RNA helicase p62	bel;Rm62;Rm62-RE	;;;;;;;;;;;;	13	2	2	2	2.5	2.5	2.5	85.413	801	801;798;458;472;473;478;485;575;578;703;818;945;719	0	21.605	1982200	1982200	2	2	9	223;533	True;True	231;549	267;649	419;1042	419;1042
Q4AB57	Q4AB57;A0A0B4KH25;P84051;P08985	Q4AB57;A0A0B4KH25;P84051;P08985	1;1;1;1	1;1;1;1	1;1;1;1	Histone H2A;Histone H2A.v	His2A:CG33859;His2Av;His2A	;;;	4	1	1	1	7.3	7.3	7.3	13.364	124	124;141;124;141	0	6.8569	15845000	15845000	2	2	10	26	True	26	29	43;44	43
A0A0B4KI24	A0A0B4KI24;Q27415	A0A0B4KI24;Q27415	1;1	1;1	1;1	Nucleoplasmin-like protein	Nlp	;	2	1	1	1	7.9	7.9	7.9	16.996	152	152;152	0	7.2001	5804300	5804300	1	1	11	79	True	81	93	140	140
A0A0B4LEY6	A0A0B4LEY6;Q94518	A0A0B4LEY6;Q94518	1;1	1;1	1;1	Nascent polypeptide-associated complex subunit alpha	Nacalpha	;	2	1	1	1	6.9	6.9	6.9	23.021	217	217;217	0	10.878	6791100	6791100	1	1	12	335	True	344	397	632	632
A0A0B4LFD2	A0A0B4LFD2;P29845	A0A0B4LFD2;P29845	21;21	21;21	21;21	Heat shock 70 kDa protein cognate 5	Hsc70-5	;	2	21	21	21	32.7	32.7	32.7	74.065	686	686;686	0	167.42	191050000	191050000	29	29	13	46;69;92;106;125;173;194;195;447;532;550;595;633;659;679;680;699;701;782;827;829	True;True;True;True;True;True;True;True;True;True;True;True;True;True;True;True;True;True;True;True;True	46;70;94;108;127;179;201;202;461;548;567;614;653;679;699;700;720;722;803;848;850	49;78;108;124;146;207;232;233;540;647;648;690;758;806;836;859;860;861;889;891;994;995;1057;1059	70;118;160;161;187;213;323;361;362;861;1040;1041;1291;1390;1465;1466;1508;1509;1548;1549;1550;1551;1603;1604;1606;1607;1788;1789;1908;1911	70;118;160;187;213;323;361;362;861;1040;1291;1390;1466;1509;1549;1551;1603;1607;1789;1908;1911
A0A0B4LFL3	A0A0B4LFL3;O96827	A0A0B4LFL3;O96827	2;2	2;2	2;2	Probable elongation factor 1-beta	Ef1beta	;	2	2	2	2	9.5	9.5	9.5	24.247	222	222;222	0	11.856	7001200	7001200	3	3	14	53;513	True;True	54;528	59;624	89;90;998	90;998
A0A0B4LFZ4	A0A0B4LFZ4;Q7KN62	A0A0B4LFZ4;Q7KN62	6;6	6;6	6;6	Transitional endoplasmic reticulum ATPase TER94	TER94	;	2	6	6	6	8.8	8.8	8.8	91.923	825	825;801	0	45.687	28099000	28099000	7	7	15	30;160;185;429;435;864	True;True;True;True;True;True	30;166;192;442;448;886	33;191;222;520;526;1099	48;295;347;348;832;839;1965	48;295;348;832;839;1965
A0A0B4LG52	A0A0B4LG52;Q9W237	A0A0B4LG52;Q9W237	7;7	7;7	7;7	40S ribosomal protein S16	RpS16	;	2	7	7	7	46.6	46.6	46.6	16.774	148	148;148	0	40.862	38842000	38842000	8	8	16	48;207;491;642;729;760;856	True;True;True;True;True;True;True	48;215;506;662;750;781;877	52;247;597;815;926;963;1089;1090	78;381;960;1477;1671;1736;1737;1953;1954	78;381;960;1477;1671;1737;1954
A0A0B4LGZ5	A0A0B4LGZ5;P46222	A0A0B4LGZ5;P46222	2;2	2;2	2;2	60S ribosomal protein L11	RpL11	;	2	2	2	2	12.5	12.5	12.5	21.112	184	184;184	0	13.476	10690000	10690000	3	3	17	833;882	True;True	854;904	1063;1120	1917;1918;1997	1918;1997
A0A0B4LJ12	A0A0B4LJ12;A0A0B4LHX6;P08879	A0A0B4LJ12;A0A0B4LHX6;P08879	1;1;1	1;1;1	1;1;1	Nucleoside diphosphate kinase	awd	;;	3	1	1	1	6.5	6.5	6.5	17.17	153	153;168;153	0.005814	5.8921	6135000	6135000	1	1	18	182	True	188	217	336	336
A0A0C4DHE7	A0A0C4DHE7;Q8IMY1;P54385	A0A0C4DHE7;Q8IMY1;P54385	3;2;2	3;2;2	3;2;2	Glutamate dehydrogenase;Glutamate dehydrogenase, mitochondrial	Gdh	;;	3	3	3	3	8.2	8.2	8.2	43.064	391	391;404;562	0	16.939	6456800	6456800	2	2	19	191;634;906	True;True;True	198;654;928	229;807;1148	358;1467;2056	358;1467;2056
A0A0C4DHE8	A0A0C4DHE8;Q9VH69	A0A0C4DHE8;Q9VH69	1;1	1;1	1;1	40S ribosomal protein S29	RpS29	;	2	1	1	1	16.1	16.1	16.1	6.5906	56	56;56	0	7.4056	0	0	1	1	20	202	True	210	242	375	375
Q9V3D8	Q9V3D8;A0A0C4FEI8	Q9V3D8;A0A0C4FEI8	1;1	1;1	1;1		grsm	;	2	1	1	1	2.2	2.2	2.2	60.169	558	558;655	0	6.2078	1978400	1978400	1	1	21	788	True	809	1002	1800	1800
A1Z6M6	A1Z6M6	A1Z6M6	5	5	5		Dpit47		1	5	5	5	13.4	13.4	13.4	46.906	396	396	0	37.063	23123000	23123000	7	7	22	98;526;648;651;734	True;True;True;True;True	100;541;668;671;755	114;639;823;826;934	170;1025;1026;1489;1492;1493;1698	170;1026;1489;1492;1698
A1Z784	A1Z784;Q7JV23;A8DY67	A1Z784;Q7JV23;A8DY67	33;30;30	33;30;30	33;30;30		ACC	;;	3	33	33	33	14.7	14.7	14.7	278.59	2482	2482;2323;2348	0	237.56	291100000	291100000	50	50	23	57;95;117;124;139;142;155;169;186;217;238;251;286;318;319;389;394;421;443;453;475;487;609;631;638;646;657;762;789;813;832;855;892	True;True;True;True;True;True;True;True;True;True;True;True;True;True;True;True;True;True;True;True;True;True;True;True;True;True;True;True;True;True;True;True;True	58;97;119;126;143;146;161;175;193;225;247;260;295;327;328;401;406;434;457;467;490;502;628;651;658;666;677;783;810;834;853;876;914	64;111;137;144;145;164;168;186;203;223;260;284;299;300;339;378;379;469;474;508;509;536;548;577;593;777;804;811;820;821;834;966;1003;1041;1062;1088;1133	96;166;167;201;211;212;246;251;252;289;290;315;316;349;407;458;459;483;484;485;549;550;601;602;749;750;757;811;812;854;855;878;923;956;1424;1461;1462;1472;1484;1485;1486;1487;1506;1742;1801;1802;1881;1916;1952;2029	96;166;201;212;246;252;290;315;349;407;459;484;549;601;602;749;757;811;855;878;923;956;1424;1462;1472;1485;1506;1742;1802;1881;1916;1952;2029
A1Z8U4	A1Z8U4;Q7KKI0	A1Z8U4;Q7KKI0	3;3	3;3	3;3		Cct5	;	2	3	3	3	6.4	6.4	6.4	55.791	512	512;542	0	17.129	6304400	6304400	3	3	24	456;612;671	True;True;True	470;631;691	551;780;849	881;1428;1530	881;1428;1530
A1Z9E3	A1Z9E3	A1Z9E3	11	11	11	Elongation factor Tu	EfTuM		1	11	11	11	27.2	27.2	27.2	53.992	489	489	0	90.206	98365000	98365000	13	13	25	157;170;177;273;283;290;291;430;465;479;781	True;True;True;True;True;True;True;True;True;True;True	163;176;183;282;292;299;300;443;480;494;802	188;204;212;323;335;345;346;347;521;562;563;581;993	292;317;330;524;542;557;558;559;560;833;898;899;929;1787	292;317;330;524;542;557;558;833;899;929;1787
A4V133	A4V133;A4V134;D1YSG7;D1YSG8;Q00168;L0MNA2;L0MLP2;L0MLR4	A4V133;A4V134;D1YSG7;D1YSG8;Q00168;L0MNA2;L0MLP2;L0MLR4	6;6;6;6;6;5;5;5	6;6;6;6;6;5;5;5	6;6;6;6;6;5;5;5	Calcium/calmodulin-dependent protein kinase type II alpha chain	CaMKII	;;;;;;;	8	6	6	6	15.9	15.9	15.9	55.481	490	490;509;530;531;530;482;504;522	0	39.781	35154000	35154000	7	7	26	20;112;240;245;385;566	True;True;True;True;True;True	20;114;249;254;397;583	22;130;286;293;465;714;715	34;194;461;476;745;1328;1329	34;194;461;476;745;1328
Q7JYK1	Q7JYK1;R9PY16;Q9W418;A4V1F9;P18101;P15357;P0CG69	Q7JYK1;R9PY16;Q9W418;A4V1F9;P18101;P15357;P0CG69	2;2;2;2;2;2;2	2;2;2;2;2;2;2	2;2;2;2;2;2;2	Ubiquitin-60S ribosomal protein L40;Ubiquitin;60S ribosomal protein L40;Ubiquitin-40S ribosomal protein S27a;Ubiquitin;40S ribosomal protein S27a;Polyubiquitin;Ubiquitin	RpL40;Ubi-p5E;Ubi-p63E;RpS27A	;;;;;;	7	2	2	2	19.5	19.5	19.5	14.729	128	128;301;534;763;128;156;763	0	15.474	9795500	9795500	1	1	27	192;748	True;True	199;769	230;950	359;1716	359;1716
A4V303	A4V303;P48605	A4V303;P48605	8;8	8;8	8;8	T-complex protein 1 subunit gamma	Cctgamma	;	2	8	8	8	16	16	16	59.394	544	544;544	0	52.673	39550000	39550000	9	9	28	10;301;334;376;534;567;732;751	True;True;True;True;True;True;True;True	10;310;343;388;550;584;753;772	11;358;396;454;650;716;717;932;953	18;574;631;727;1043;1330;1331;1696;1719	18;574;631;727;1043;1331;1696;1719
A4V391	A4V391;P12613	A4V391;P12613	13;13	13;13	13;13	T-complex protein 1 subunit alpha	T-cp1	;	2	13	13	13	24.8	24.8	24.8	59.556	557	557;557	0	94.05	101830000	101830000	16	16	29	96;188;209;284;332;351;474;686;706;709;717;895;899	True;True;True;True;True;True;True;True;True;True;True;True;True	98;195;217;293;341;360;489;706;727;730;738;917;921	112;225;249;336;394;419;575;576;868;869;897;901;911;1136;1140	168;352;384;543;544;629;669;921;922;1564;1565;1620;1627;1628;1646;2034;2040;2041	168;352;384;543;629;669;921;1564;1620;1628;1646;2034;2040
C8VV14	C8VV14;F3YDE2;A4V3G1;P07764	C8VV14;F3YDE2;A4V3G1;P07764	2;2;2;2	2;2;2;2	2;2;2;2	Fructose-bisphosphate aldolase	Ald-RC;Ald-RH;Ald	;;;	4	2	2	2	6.4	6.4	6.4	39.047	361	361;363;363;361	0	11.447	7821300	7821300	2	2	30	490;880	True;True	505;902	596;1118	959;1994	959;1994
A4V4A5	A4V4A5;Q9VZ23	A4V4A5;Q9VZ23	3;3	3;3	3;3	GTP-binding nuclear protein Ran	Ran;ran	;	2	3	3	3	14.8	14.8	14.8	24.708	216	216;216	0	20.785	31135000	31135000	4	4	31	89;226;568	True;True;True	91;235;585	105;271;718	155;431;1332;1333	155;431;1332
Q0E924	Q0E924;A8DYI7;A8DYI6	Q0E924;A8DYI7;A8DYI6	5;5;5	5;5;5	5;5;5		Phb2	;;	3	5	5	5	21.7	21.7	21.7	33.066	299	299;303;338	0	38.078	40370000	40370000	6	6	32	262;398;452;837;839	True;True;True;True;True	271;411;466;858;860	311;480;547;1067;1069	505;766;767;877;1924;1926	505;766;877;1924;1926
A8Y560	A8Y560;O17445	A8Y560;O17445	1;1	1;1	1;1	Ribosomal protein L15;60S ribosomal protein L15	RpL15	;	2	1	1	1	4.4	4.4	4.4	24.325	204	204;204	0.0063291	6.1827	5701600	5701600	0	0	33	281	True	290	333	539	539
B5RJQ0	B5RJQ0;Q95028	B5RJQ0;Q95028	5;5	5;5	5;5	L-lactate dehydrogenase	ImpL3	;	2	5	5	5	21.4	21.4	21.4	35.537	332	332;332	0	41.696	62053000	62053000	8	8	34	126;179;441;606;828	True;True;True;True;True	128;185;455;625;849	147;148;214;533;772;1058	214;215;216;332;849;850;1416;1909;1910	216;332;849;1416;1910
Q7KUB0	Q7KUB0;Q8IQA7;Q9VSI6;Q7KUB1;B7Z0E0	Q7KUB0;Q8IQA7;Q9VSI6;Q7KUB1;B7Z0E0	4;4;4;4;4	4;4;4;4;4	4;4;4;4;4	Isocitrate dehydrogenase [NADP]	Idh	;;;;	5	4	4	4	11.3	11.3	11.3	46.66	416	416;437;450;469;479	0	25.319	11850000	11850000	3	3	35	27;72;556;786	True;True;True;True	27;73;573;807	30;82;699;999	45;123;1305;1796	45;123;1305;1796
X2JCX8	X2JCX8;C0HKA1;C0HKA0	X2JCX8;C0HKA1;C0HKA0	2;2;2	2;2;2	2;2;2		RpS14b	;;	3	2	2	2	15.9	15.9	15.9	16.265	151	151;151;151	0	13.621	12576000	12576000	2	2	36	336;769	True;True	345;790	398;976	633;1756	633;1756
C0HL67	C0HL67;C0HL66;P02299	C0HL67;C0HL66;P02299	3;3;3	3;3;3	3;3;3	Histone H3	His3	;;	3	3	3	3	13.2	13.2	13.2	15.328	136	136;136;136	0	16.992	23911000	23911000	2	2	37	158;159;708	True;True;True	164;165;729	189;190;900	293;294;1626	293;294;1626
Q95RG1	Q95RG1;C6SUW3;P55935	Q95RG1;C6SUW3;P55935	2;2;2	2;2;2	2;2;2	40S ribosomal protein S9	RpS9	;;	3	2	2	2	14.6	14.6	14.6	16.322	137	137;195;195	0	12.819	3314100	3314100	2	2	38	178;357	True;True	184;366	213;427	331;685	331;685
C7LA75	C7LA75;P11147	C7LA75;P11147	28;28	28;28	23;23	Heat shock 70 kDa protein cognate 4	Hsc70-4-RA;Hsc70-4	;	2	28	28	23	43.8	43.8	35.3	71.131	651	651;651	0	299.82	1309500000	1297900000	89	89	39	63;68;93;119;171;196;213;214;325;339;340;361;410;425;478;517;531;580;611;707;712;718;738;780;783;792;814;875	True;True;True;True;True;True;True;True;True;True;True;True;True;True;True;True;True;True;True;True;True;True;True;True;True;True;True;True	64;69;95;121;177;203;221;222;334;348;349;370;423;438;493;532;547;599;630;728;733;739;759;801;804;813;835;897	71;72;77;109;139;205;234;254;255;256;257;385;386;401;402;403;404;431;432;493;494;515;580;628;629;645;646;735;779;898;899;905;912;913;938;991;992;996;1008;1009;1042;1111;1112;1113	109;110;111;116;117;162;163;203;318;319;363;390;391;392;393;394;395;396;397;398;399;400;401;402;403;404;611;612;613;614;638;639;640;641;642;690;691;692;693;786;787;788;789;825;826;927;928;1002;1003;1004;1005;1037;1038;1039;1358;1359;1426;1427;1621;1622;1623;1624;1625;1635;1647;1648;1649;1650;1651;1652;1653;1654;1702;1785;1786;1790;1791;1809;1810;1811;1812;1813;1882;1883;1984;1985;1986;1987;1988	110;116;162;203;319;363;391;397;612;638;641;693;787;826;928;1005;1039;1358;1427;1625;1635;1649;1702;1785;1791;1813;1882;1985
C9QP42	C9QP42;Q02748;Q9VHS8	C9QP42;Q02748	13;13;2	13;13;2	13;13;2	Eukaryotic initiation factor 4A	eIF-4a	;	3	13	13	13	33.3	33.3	33.3	45.878	403	403;403;399	0	107.88	160410000	160410000	20	20	40	32;121;133;143;168;256;274;288;369;409;414;834;868	True;True;True;True;True;True;True;True;True;True;True;True;True	32;123;136;147;174;265;283;297;380;422;427;855;890	35;141;157;169;202;305;324;325;342;343;445;446;492;498;1064;1103	50;205;206;233;253;254;313;314;491;525;526;527;554;555;714;715;785;793;1919;1920;1970;1971	50;205;233;253;314;491;526;555;715;785;793;1919;1970
E1JGZ9	E1JGZ9;Q9XZJ4	E1JGZ9;Q9XZJ4	2;2	2;2	2;2	Proteasome subunit alpha type;Proteasome subunit alpha type-6	Prosalpha1	;	2	2	2	2	10.2	10.2	10.2	27.162	244	244;244	0	17.132	10151000	10151000	2	2	58	31;558	True;True	31;575	34;701	49;1307	49;1307
E1JHA4	E1JHA4;P48809	E1JHA4;P48809	2;2	2;2	2;2	Heterogeneous nuclear ribonucleoprotein 27C	Hrb27C	;	2	2	2	2	8.6	8.6	8.6	44.769	421	421;421	0	15.281	7723200	7723200	2	2	59	55;822	True;True	56;843	61;1051	93;1896	93;1896
E1JJM9	E1JJM9;P48149;Q7KR04	E1JJM9;P48149;Q7KR04	4;4;3	4;4;3	4;4;3	40S ribosomal protein S15Aa;40S ribosomal protein S15Ab	RpS15Aa;RpS15Ab	;;	3	4	4	4	30.8	30.8	30.8	14.771	130	130;130;130	0	26.67	31793000	31793000	5	5	60	313;399;540;878	True;True;True;True	322;412;556;900	373;481;656;1116	595;768;1052;1053;1992	595;768;1053;1992
E2QCG7	E2QCG7;Q0E940	E2QCG7;Q0E940	2;2	2;2	2;2	Eukaryotic translation initiation factor 3 subunit B	eIF3-S9	;	2	2	2	2	2.6	2.6	2.6	80.44	690	690;690	0	11.874	1600600	1600600	2	2	61	65;358	True;True	66;367	74;428	113;686	113;686
E2QD65	E2QD65;P39018	E2QD65;P39018	3;3	3;3	3;3	40S ribosomal protein S19a	RpS19a	;	2	3	3	3	17.3	17.3	17.3	17.291	156	156;156	0	17.401	13193000	13193000	3	3	62	45;331;697	True;True;True	45;340;718	48;393;887	69;628;1600	69;628;1600
F3YDH0	F3YDH0;P29844	F3YDH0;P29844	17;17	13;13	13;13	Heat shock 70 kDa protein cognate 3	Hsc70-3	;	2	17	13	13	28.7	22.7	22.7	72.26	656	656;656	0	113.83	158720000	158720000	22	22	63	36;94;110;132;196;201;361;395;397;507;531;551;578;579;582;814;876	True;True;True;True;False;True;False;True;True;True;False;True;True;True;True;False;True	36;96;112;135;203;209;370;407;410;522;547;568;597;598;601;835;898	39;110;128;156;234;240;241;431;432;475;476;479;617;618;645;646;691;733;734;737;1042;1114	55;164;165;191;192;231;232;363;373;374;690;691;692;693;758;759;765;990;991;1037;1038;1039;1292;1293;1355;1356;1357;1361;1362;1882;1883;1989	55;164;192;231;363;374;693;759;765;990;1039;1293;1355;1357;1361;1882;1989
G3M3A2	G3M3A2;Q06559	G3M3A2;Q06559	15;15	15;15	15;15	40S ribosomal protein S3	RpS3	;	2	15	15	15	53.7	53.7	53.7	27.471	246	246;246	0	103.8	280630000	275290000	30	30	64	12;167;180;248;276;338;377;402;403;412;419;420;537;735;898	True;True;True;True;True;True;True;True;True;True;True;True;True;True;True	12;173;186;257;285;347;389;415;416;425;432;433;553;756;920	13;200;201;215;296;328;400;455;456;484;485;486;496;505;506;507;653;935;1139	21;311;312;333;334;479;480;531;532;637;728;729;730;731;773;774;775;776;777;791;804;805;806;807;808;809;810;1047;1048;1699;2039	21;312;334;479;532;637;729;774;775;791;806;810;1047;1699;2039
M9MQH9	M9MQH9;M9NDI6;H5V8B8;P36179	M9MQH9;M9NDI6;H5V8B8;P36179	1;1;1;1	1;1;1;1	1;1;1;1	Serine/threonine-protein phosphatase PP2A 65 kDa regulatory subunit	Pp2A-29B	;;;	4	1	1	1	2	2	2	65.423	591	591;650;650;591	0	6.4277	2890300	2890300	1	1	65	499	True	514	609	981	981
I0DHK3	I0DHK3;P12881	I0DHK3;P12881	1;1	1;1	1;1	Proteasome subunit alpha type;Proteasome subunit alpha type-1	Prosalpha6	;	2	1	1	1	3.9	3.9	3.9	31.058	279	279;279	0.0059172	5.9487	1551300	1551300	1	1	66	220	True	228	263	411	411
X2JH42	X2JH42;L0MQ04;Q05825;Q8T4C4	X2JH42;L0MQ04;Q05825	8;8;8;2	8;8;8;2	8;8;8;2	ATP synthase subunit beta;ATP synthase subunit beta, mitochondrial	ATPsynbeta;ATPsyn-beta	;;	4	8	8	8	20.4	20.4	20.4	54.107	505	505;511;505;622	0	57.359	39911000	39911000	9	9	67	28;235;346;363;378;511;745;803	True;True;True;True;True;True;True;True	28;244;355;372;390;526;766;824	31;281;410;435;457;622;946;1020	46;454;455;653;699;732;996;1711;1826	46;454;653;699;732;996;1711;1826
Q9VUC1	Q9VUC1;M9MSL3	Q9VUC1;M9MSL3	5;5	5;5	5;5		Hsc70Cb	;	2	5	5	5	9.8	9.8	9.8	88.5	804	804;836	0	30.525	15592000	15592000	4	4	68	411;617;668;700;726	True;True;True;True;True	424;636;688;721;747	495;787;846;890;922	790;1438;1527;1605;1666	790;1438;1527;1605;1666
M9ND19	M9ND19;Q9W0P5	M9ND19;Q9W0P5	3;3	3;3	3;3	UDP-glucose 4-epimerase	Gale	;	2	3	3	3	12	12	12	38.696	350	350;350	0	16.81	14998000	14998000	2	2	69	640;810;893	True;True;True	660;831;915	813;1038;1134	1475;1877;2030	1475;1877;2030
M9NEQ9	M9NEQ9;Q9VWG3;Q9VB14	M9NEQ9;Q9VWG3	3;3;1	3;3;1	3;3;1	40S ribosomal protein S10b	RpS10b	;	3	3	3	3	14.4	14.4	14.4	17.878	160	160;160;163	0	20.102	10358000	10358000	3	3	70	253;413;802	True;True;True	262;426;823	302;497;1019	488;792;1825	488;792;1825
M9PB84	M9PB84;P31009	M9PB84;P31009	4;4	4;4	4;4	40S ribosomal protein S2	RpS2	;	2	4	4	4	20.2	20.2	20.2	28.899	267	267;267	0	23.49	18560000	18560000	5	5	71	184;298;344;796	True;True;True;True	191;307;353;817	221;355;408;1013	346;571;651;1818;1819	346;571;651;1819
M9PBL3	M9PBL3;P02828	M9PBL3;P02828	24;24	24;24	24;24	Heat shock protein 83	Hsp83	;	2	24	24	24	31.4	31.4	31.4	81.864	717	717;717	0	214.03	358500000	358500000	43	43	72	14;43;123;129;145;153;154;166;175;176;219;239;321;324;424;458;614;645;689;727;764;768;891;910	True;True;True;True;True;True;True;True;True;True;True;True;True;True;True;True;True;True;True;True;True;True;True;True	14;43;125;131;149;159;160;172;181;182;227;248;330;333;437;472;633;665;709;748;785;789;913;932	15;46;143;152;171;184;185;199;209;210;211;262;285;381;384;514;553;782;818;819;873;923;924;968;969;970;975;1132;1152	23;65;209;210;221;256;257;286;287;288;310;325;326;327;328;329;409;410;460;604;605;609;610;824;883;1430;1431;1480;1481;1482;1483;1574;1575;1667;1668;1669;1744;1745;1746;1747;1755;2028;2061	23;65;209;221;257;287;288;310;326;327;410;460;604;609;824;883;1431;1481;1574;1668;1746;1755;2028;2061
Q9VS25	Q9VS25;M9PBT2;M9PHM1;Q8IQ73	Q9VS25;M9PBT2;M9PHM1;Q8IQ73	1;1;1;1	1;1;1;1	1;1;1;1		corn	;;;	4	1	1	1	0.9	0.9	0.9	105.5	960	960;970;1101;1107	0.005988	6.0385	3480000	3480000	1	1	73	539	True	555	655	1051	1051	8;9	827;829
M9PCC1	M9PCC1;O18640;M9PB67;Q9VYQ9	M9PCC1;O18640	11;11;4;1	11;11;4;1	11;11;4;1	Guanine nucleotide-binding protein subunit beta-like protein	Rack1	;	4	11	11	11	33.6	33.6	33.6	35.618	318	318;318;109;482	0	76.076	118380000	118380000	18	18	74	44;99;109;120;230;426;522;524;787;870;871	True;True;True;True;True;True;True;True;True;True;True	44;101;111;122;239;439;537;539;808;892;893	47;115;127;140;275;516;635;637;1000;1001;1105;1106	66;67;68;171;190;204;442;827;1017;1018;1020;1021;1797;1798;1799;1974;1975;1976	67;171;190;204;442;827;1017;1020;1798;1975;1976
M9PD75	M9PD75;Q94920	M9PD75;Q94920	5;5	5;5	5;5	Voltage-dependent anion-selective channel	porin	;	2	5	5	5	23.8	23.8	23.8	30.55	282	282;282	0	31.255	36999000	36999000	6	6	75	52;497;779;845;907	True;True;True;True;True	53;512;800;866;929	58;605;990;1075;1149	88;972;1783;1784;1934;2057	88;972;1783;1934;2057
M9PFF0	M9PFF0;P41126	M9PFF0;P41126	2;2	2;2	2;2	60S ribosomal protein L13	RpL13	;	2	2	2	2	7.8	7.8	7.8	24.951	218	218;218	0	11.382	5703200	5703200	2	2	76	463;795	True;True	478;816	560;1012	896;1817	896;1817
M9PG47	M9PG47;P13008	M9PG47;P13008	1;1	1;1	1;1	40S ribosomal protein S26	RpS26	;	2	1	1	1	7.9	7.9	7.9	13.266	114	114;114	0.0062893	6.1569	3026700	3026700	1	1	77	557	True	574	700	1306	1306
M9PG76	M9PG76;P19889	M9PG76;P19889	3;3	3;3	3;3	60S acidic ribosomal protein P0	RpLP0	;	2	3	3	3	13.2	13.2	13.2	34.202	317	317;317	0	19.078	14368000	14368000	3	3	78	84;205;268	True;True;True	86;213;277	99;245;317	149;378;516	149;378;516
M9PHM6	M9PHM6;Q9VS34	M9PHM6;Q9VS34	3;3	3;3	3;3	60S ribosomal protein L18	RpL18	;	2	3	3	3	18.6	18.6	18.6	21.664	188	188;188	0	18.208	6172900	6172900	3	3	79	23;508;585	True;True;True	23;523;604	25;619;743	38;992;1369	38;992;1369
M9PIM0	M9PIM0;O61231	M9PIM0;O61231	1;1	1;1	1;1	60S ribosomal protein L10	RpL10	;	2	1	1	1	4.1	4.1	4.1	25.527	218	218;218	0	7.3566	0	0	1	1	80	535	True	551	651	1044	1044
M9PJN8	M9PJN8;P07487;P07486;Q7JY07	M9PJN8;P07487;P07486	5;5;4;1	5;5;4;1	5;5;4;1	Glyceraldehyde-3-phosphate dehydrogenase;Glyceraldehyde-3-phosphate dehydrogenase 2;Glyceraldehyde-3-phosphate dehydrogenase 1	Gapdh2;Gapdh1	;;	4	5	5	5	18.7	18.7	18.7	35.369	332	332;332;332;343	0	51.904	79148000	79148000	9	9	81	466;504;850;854;869	True;True;True;True;True	481;519;871;875;891	564;614;1081;1082;1087;1104	900;901;987;1942;1943;1944;1951;1972;1973	901;987;1942;1951;1973
O02649	O02649;Q9VMN5	O02649;Q9VMN5	10;5	10;5	10;5	60 kDa heat shock protein, mitochondrial;60 kDa heat shock protein homolog 2, mitochondrial	Hsp60;Hsp60C	;	2	10	10	10	22.2	22.2	22.2	60.808	573	573;576	0	77.986	72844000	72844000	9	9	82	8;107;302;437;445;457;515;548;586;825	True;True;True;True;True;True;True;True;True;True	8;109;311;450;459;471;530;565;605;846	9;125;359;528;538;552;626;667;744;1054	15;188;575;841;842;858;882;1000;1073;1370;1903	15;188;575;841;858;882;1000;1073;1370;1903
O62619	O62619	O62619	12	12	12	Pyruvate kinase	PyK		1	12	12	12	31.5	31.5	31.5	57.44	533	533	0	74.273	112920000	112920000	16	16	83	25;64;88;138;243;252;415;459;492;536;538;601	True;True;True;True;True;True;True;True;True;True;True;True	25;65;90;142;252;261;428;473;507;552;554;620	28;73;104;163;290;301;499;554;598;599;652;654;765	42;112;154;245;470;486;487;794;884;961;962;963;964;1045;1046;1049;1050;1400	42;112;154;245;470;486;794;884;962;1045;1050;1400
O97125	O97125;Q9VG58;Q9BIS2;Q9BIR7;Q8INI8;P82910;P02825;P11146	O97125;Q9VG58;Q9BIS2;Q9BIR7;Q8INI8;P82910;P02825;P11146	3;3;3;3;3;3;3;2	1;1;1;1;1;1;1;1	1;1;1;1;1;1;1;1	Heat shock protein 68;Major heat shock 70 kDa protein Bbb;Major heat shock 70 kDa protein Bb;Major heat shock 70 kDa protein Bc;Major heat shock 70 kDa protein Ba;Major heat shock 70 kDa protein Aa;Major heat shock 70 kDa protein Ab;Heat shock 70 kDa protein cognate 2	Hsp68;Hsp70Bbb;Hsp70Bb;Hsp70Bc;Hsp70Ba;Hsp70Aa;Hsp70Ab;Hsc70-2	;;;;;;;	8	3	1	1	6.8	2.5	2.5	69.743	635	635;641;641;641;641;642;642;633	0	12.843	32903000	32903000	5	5	84	362;707;814	True;False;False	371;728;835	433;434;898;899;1042	694;695;696;697;698;1621;1622;1623;1624;1625;1882;1883	695;1625;1882
O97477	O97477	O97477	2	2	2	Inositol-3-phosphate synthase	Inos		1	2	2	2	5.7	5.7	5.7	62.249	565	565	0	12.524	6324800	6324800	2	2	85	51;249	True;True	52;258	57;297	87;481	87;481
P02283	P02283	P02283	4	4	4	Histone H2B	His2B		1	4	4	4	29.3	29.3	29.3	13.696	123	123	0	24.242	48716000	48716000	6	6	86	162;193;476;628	True;True;True;True	168;200;491;647	194;231;578;799;800	300;360;924;925;1455;1456	300;360;925;1455
X2JGG6	X2JGG6;P02517	X2JGG6;P02517	2;2	2;2	2;2	Heat shock protein 26	Hsp26	;	2	2	2	2	12	12	12	22.994	208	208;208	0	11.113	10932000	10932000	2	2	87	364;911	True;True	373;933	436;1153	700;2062	700;2062
X2JCP8	X2JCP8;P10987;P02572;A0A0B4LH50;P83967;P53501;P10981;M9PFZ6;P02574;P45891	X2JCP8;P10987;P02572;A0A0B4LH50;P83967;P53501;P10981;M9PFZ6;P02574	13;13;13;11;11;11;11;8;8;3	13;13;13;11;11;11;11;8;8;3	13;13;13;11;11;11;11;8;8;3	Actin-5C;Actin-42A;Actin, indirect flight muscle;Actin-57B;Actin-87E;Actin, larval muscle	Act5C;Act42A;Act87E;Act88F;Act57B;Act79B	;;;;;;;;	10	13	13	13	33.5	33.5	33.5	41.821	376	376;376;376;376;376;376;376;376;376;376	0	131.02	269560000	269560000	31	31	88	22;74;75;115;127;128;163;304;320;598;635;723;804	True;True;True;True;True;True;True;True;True;True;True;True;True	22;75;76;117;129;130;169;313;329;617;655;744;825	24;84;85;86;134;135;149;150;151;195;361;380;761;762;808;918;919;1021;1022	36;37;125;126;127;128;198;199;217;218;219;220;301;302;303;577;578;603;1394;1395;1396;1468;1659;1660;1661;1662;1827;1828;1829;1830;1831	36;125;127;199;217;220;301;577;603;1395;1468;1662;1831
P06605	P06605;P06603;P06604;P06606	P06605;P06603;P06604	18;18;11;1	18;18;11;1	18;18;11;1	Tubulin alpha-3 chain;Tubulin alpha-1 chain;Tubulin alpha-2 chain	alphaTub84D;alphaTub84B;alphaTub85E	;;	4	18	18	18	42.2	42.2	42.2	49.89	450	450;450;449;462	0	227.1	883900000	883900000	53	53	89	70;76;134;144;164;270;349;442;500;564;615;616;639;644;747;790;826;905	True;True;True;True;True;True;True;True;True;True;True;True;True;True;True;True;True;True	71;77;137;148;170;279;358;456;515;581;634;635;659;664;768;811;847;927	79;80;87;88;158;170;196;320;414;415;534;535;610;711;712;783;784;785;786;812;817;948;949;1004;1005;1055;1056;1147	119;120;121;129;130;131;132;133;234;235;236;255;304;305;520;657;658;659;660;661;662;663;664;851;852;853;982;983;1323;1324;1325;1326;1432;1433;1434;1435;1436;1437;1473;1474;1479;1713;1714;1715;1803;1804;1805;1806;1904;1905;1906;1907;2055	120;132;234;255;304;520;664;853;982;1326;1434;1436;1473;1479;1714;1804;1907;2055
P08736	P08736;A4V3Q6;P05303	P08736;A4V3Q6;P05303	13;9;9	13;9;9	13;9;9	Elongation factor 1-alpha 1;Elongation factor 1-alpha;Elongation factor 1-alpha 2	Ef1alpha48D;Ef1alpha100E	;;	3	13	13	13	34.3	34.3	34.3	50.306	463	463;462;462	0	101.97	1008500000	1000600000	33	33	90	156;200;342;488;528;618;626;715;716;757;816;915;916	True;True;True;True;True;True;True;True;True;True;True;True;True	162;208;351;503;543;544;637;645;736;737;778;837;937;938	187;239;406;594;641;642;788;797;908;909;910;959;960;1044;1045;1157;1158;1159	291;372;644;645;646;647;957;1028;1029;1030;1031;1032;1033;1034;1439;1452;1640;1641;1642;1643;1644;1645;1727;1728;1885;1886;1887;1888;2067;2068;2069;2070;2071	291;372;645;957;1031;1439;1452;1640;1644;1728;1886;2070;2071	10	155
P09180	P09180	P09180	2	2	2	60S ribosomal protein L4	RpL4		1	2	2	2	8.2	8.2	8.2	45.025	401	401	0	10.952	5700700	5700700	2	2	91	236;596	True;True	245;615	282;759	456;1391	456;1391
P13060	P13060	P13060	10	10	10	Elongation factor 2	EF2		1	10	10	10	10.8	10.8	10.8	94.458	844	844	0	63.298	70411000	70411000	15	15	92	261;367;523;577;655;710;817;844;885;902	True;True;True;True;True;True;True;True;True;True	270;378;538;596;675;731;838;865;907;924	310;443;636;732;832;902;1046;1074;1126;1143;1144	503;504;711;1019;1354;1504;1629;1630;1889;1932;1933;2012;2013;2045;2046	504;711;1019;1354;1504;1629;1889;1932;2012;2045
P17704	P17704	P17704	4	4	4	40S ribosomal protein S17	RpS17		1	4	4	4	35.9	35.9	35.9	15.285	131	131	0	26.061	33332000	33332000	4	4	93	280;329;333;470	True;True;True;True	289;338;342;485	332;391;395;570	538;625;630;915	538;625;630;915
P21187	P21187	P21187	1	1	1	Polyadenylate-binding protein	pAbp		1	1	1	1	1.7	1.7	1.7	69.925	634	634	0	6.5727	2643100	2643100	1	1	94	38	True	38	41	57	57
P25007	P25007	P25007	2	2	2	Peptidyl-prolyl cis-trans isomerase	Cyp1		1	2	2	2	12.8	12.8	12.8	24.666	227	227	0	14.34	6348700	6348700	2	2	95	323;820	True;True	332;841	383;1049	608;1893	608;1893
Q95TP9	Q95TP9;P29327	Q95TP9;P29327	2;2	2;2	2;2	40S ribosomal protein S6	RpS6	;	2	2	2	2	9.7	9.7	9.7	24.696	217	217;248	0	13.591	9701700	9701700	3	3	96	105;467	True;True	107;482	123;565	186;902;903	186;903
P29843	P29843	P29843	2	1	1	Heat shock 70 kDa protein cognate 1	Hsc70-1		1	2	1	1	3.7	2	2	70.686	641	641	0	6.7374	83281000	83281000	1	1	97	784;814	True;False	805;835	997;1042	1792;1882;1883	1792;1882
P35381	P35381	P35381	9	9	9	ATP synthase subunit alpha, mitochondrial	blw		1	9	9	9	18.7	18.7	18.7	59.421	552	552	0	61.191	68061000	68061000	12	12	98	71;103;141;619;728;741;775;838;867	True;True;True;True;True;True;True;True;True	72;105;145;638;749;762;796;859;889	81;119;166;167;789;925;941;984;1068;1102	122;177;248;249;250;1440;1670;1705;1767;1768;1925;1968;1969	122;177;248;1440;1670;1705;1768;1925;1969
P38979	P38979	P38979	8	8	8	40S ribosomal protein SA	sta		1	8	8	8	33	33	33	30.228	270	270	0	73.562	92534000	92534000	13	13	99	13;35;233;234;632;669;897;909	True;True;True;True;True;True;True;True	13;35;242;243;652;689;919;931	14;38;279;280;805;847;1138;1151	22;54;450;451;452;453;1463;1464;1528;2037;2038;2059;2060	22;54;451;452;1464;1528;2037;2060
X2JGM9	X2JGM9;P41042	X2JGM9;P41042	4;4	4;4	4;4	40S ribosomal protein S4	RpS4	;	2	4	4	4	14.6	14.6	14.6	29.134	261	261;261	0	22.488	16344000	16344000	3	3	100	300;317;496;506	True;True;True;True	309;326;511;521	357;377;604;616	573;600;971;989	573;600;971;989
P41094	P41094	P41094	3	3	3	40S ribosomal protein S18	RpS18		1	3	3	3	19.1	19.1	19.1	17.611	152	152	0	22.092	49369000	49369000	5	5	101	373;849;913	True;True;True	384;870;935	450;1080;1155	719;1940;1941;2064;2065	719;1940;2065
X2JFR6	X2JFR6;P41374	X2JFR6;P41374	2;2	2;2	2;2	Eukaryotic translation initiation factor 2 subunit 1	eIF-2alpha	;	2	2	2	2	6.5	6.5	6.5	38.645	341	341;341	0	14.765	8753500	8753500	4	4	102	40;277	True;True	40;286	43;329	61;62;533;534	61;533
P41375	P41375	P41375	1	1	1	Eukaryotic translation initiation factor 2 subunit 2	eIF-2beta		1	1	1	1	3.8	3.8	3.8	35.217	312	312	0	6.569	1668800	1668800	0	0	103	448	True	462	541	862	862
P45437	P45437	P45437	1	1	1	Coatomer subunit beta	betaCop		1	1	1	1	0.9	0.9	0.9	107.41	964	964	0	6.4396	2874900	2874900	1	1	104	879	True	901	1117	1993	1993
P45594	P45594	P45594	2	2	2	Cofilin/actin-depolymerizing factor homolog	tsr		1	2	2	2	14.9	14.9	14.9	17.153	148	148	0	11.882	4557700	4557700	2	2	105	449;604	True;True	463;623	542;770	863;864;1414	863;1414
P48159	P48159	P48159	2	2	2	60S ribosomal protein L23	RpL23		1	2	2	2	13.6	13.6	13.6	14.936	140	140	0	13.853	7670200	7670200	3	3	106	573;842	True;True	590;863	724;725;1072	1343;1344;1930	1343;1930
P48591	P48591	P48591	3	3	3	Ribonucleoside-diphosphate reductase large subunit	RnrL		1	3	3	3	4.8	4.8	4.8	91.977	812	812	0	18.99	9734100	9734100	3	3	107	352;650;848	True;True;True	361;670;869	420;825;1079	670;1491;1939	670;1491;1939
P48592	P48592	P48592	2	2	2	Ribonucleoside-diphosphate reductase subunit M2	RnrS		1	2	2	2	6.1	6.1	6.1	45.114	393	393	0	13.414	3742600	3742600	2	2	108	370;720	True;True	381;741	447;915	716;1656	716;1656
P48604	P48604	P48604	7	7	7	GrpE protein homolog, mitochondrial	Roe1		1	7	7	7	37.1	37.1	37.1	23.926	213	213	0	50.043	48793000	48793000	9	9	109	85;108;113;307;341;572;681	True;True;True;True;True;True;True	87;110;115;316;350;589;701	100;101;126;131;365;366;405;723;862	150;151;189;195;584;585;643;1342;1552;1553	151;189;195;585;643;1342;1553
X2JDU0	X2JDU0;P50882	X2JDU0;P50882	1;1	1;1	1;1	60S ribosomal protein L9	RpL9	;	2	1	1	1	6.3	6.3	6.3	21.392	190	190;190	0.00625	6.1208	4081900	4081900	1	1	110	314	True	323	374	596	596
P50887	P50887	P50887	2	2	2	60S ribosomal protein L22	RpL22		1	2	2	2	12.7	12.7	12.7	30.61	299	299	0	11.754	7826100	7826100	2	2	111	1;866	True;True	1;888	1;1101	1;1967	1;1967
P55828	P55828	P55828	4	4	4	40S ribosomal protein S20	RpS20		1	4	4	4	29.2	29.2	29.2	13.488	120	120	0	39.328	364260000	364260000	18	18	112	104;353;354;683	True;True;True;True	106;362;363;703	120;121;122;421;422;423;865	178;179;180;181;182;183;184;185;671;672;673;674;675;676;677;1557;1558;1559	182;675;676;1557
P55830	P55830	P55830	4	4	4	40S ribosomal protein S3a	RpS3A		1	4	4	4	16	16	16	30.34	268	268	0	26.419	26957000	26957000	7	7	113	436;461;544;819	True;True;True;True	449;476;560;840	527;558;661;1048	840;893;894;1059;1060;1891;1892	840;893;1059;1892
P55841	P55841	P55841	1	1	1	60S ribosomal protein L14	RpL14		1	1	1	1	7.2	7.2	7.2	19.173	166	166	0.0057143	5.8768	2050000	2050000	1	1	114	509	True	524	620	993	993
P92177	P92177	P92177	2	2	2	14-3-3 protein epsilon	14-3-3epsilon		1	2	2	2	8.8	8.8	8.8	29.798	262	262	0	15.221	12580000	12580000	3	3	115	315;900	True;True	324;922	375;1141	597;598;2042	598;2042
P92204	P92204	P92204	1	1	1	Negative elongation factor E	Nelf-E		1	1	1	1	4.3	4.3	4.3	31.811	280	280	0.0055866	5.7893	11209000	11209000	1	1	116	641	True	661	814	1476	1476
Q0E8E8	Q0E8E8	Q0E8E8	1	1	1		Mpcp		1	1	1	1	2.5	2.5	2.5	38.85	356	356	0.0059524	5.9569	2459200	2459200	1	1	117	865	True	887	1100	1966	1966
X2JKU5	X2JKU5;Q24186;A0A0B4K683;Q9VFE4	X2JKU5;Q24186;A0A0B4K683;Q9VFE4	3;3;2;2	3;3;2;2	3;3;2;2	40S ribosomal protein S5a;40S ribosomal protein S5b	RpS5a;RpS5b	;;;	4	3	3	3	13.6	13.6	13.6	25.434	228	228;228;180;230	0	20.465	14491000	14491000	6	6	118	56;594;846	True;True;True	57;613;867	62;63;757;1076;1077	94;95;1389;1935;1936;1937	94;1389;1935
Q24560	Q24560;A1ZBL0;P61857;A0A0B4LGH1;P08841;Q9VAX7;Q8MST5;CON__ENSEMBL:ENSBTAP00000025008	Q24560;A1ZBL0;P61857;A0A0B4LGH1;P08841	18;16;12;10;10;7;7;5	18;16;12;10;10;7;7;5	18;16;12;10;10;7;7;5	Tubulin beta-1 chain;Tubulin beta-2 chain;Tubulin beta-3 chain	betaTub56D;betaTub85D;betaTub60D	;;;;	8	18	18	18	41.6	41.6	41.6	50.147	447	447;456;446;453;454;457;457;536	0	191.96	907350000	855960000	91	91	119	47;77;165;198;227;228;269;374;381;384;416;440;460;541;574;583;731;904	True;True;True;True;True;True;True;True;True;True;True;True;True;True;True;True;True;True	47;78;79;171;205;206;236;237;278;385;386;393;396;429;453;454;474;475;557;591;592;602;752;926	50;51;89;90;91;197;198;236;237;272;273;318;319;451;452;460;464;500;501;531;532;555;556;557;657;658;726;727;738;739;928;929;930;931;1146	71;72;73;74;75;76;77;134;135;136;137;138;306;307;308;309;366;367;368;369;432;433;434;435;436;437;438;439;440;517;518;519;720;721;722;723;736;737;743;744;795;796;797;798;845;846;847;848;885;886;887;888;889;890;891;892;1054;1055;1056;1345;1346;1347;1363;1364;1365;1673;1674;1675;1676;1677;1678;1679;1680;1681;1682;1683;1684;1685;1686;1687;1688;1689;1690;1691;1692;1693;1694;1695;2052;2053;2054	74;135;308;368;434;439;517;723;736;744;796;847;888;1055;1346;1363;1695;2053	11;12;13;14;15;16	73;164;257;267;299;330
Q27268	Q27268;M9PC90	Q27268;M9PC90	3;2	3;2	3;2	ATP-dependent RNA helicase WM6	Hel25E	;	2	3	3	3	7.8	7.8	7.8	48.651	424	424;305	0	17.319	6663400	6663400	3	3	120	102;371;670	True;True;True	104;382;690	118;448;848	176;717;1529	176;717;1529
Q2PE22	Q2PE22	Q2PE22	1	1	1		CG34026-RA		1	1	1	1	8.5	8.5	8.5	12.723	117	117	0.0060241	6.0408	279260000	279260000	1	1	121	247	True	256	295	478	478
Q3YMU0	Q3YMU0	Q3YMU0	2	2	2	Protein disulfide-isomerase	ERp60		1	2	2	2	4.7	4.7	4.7	55.37	489	489	0	10.931	7407500	7407500	2	2	122	3;908	True;True	3;930	3;1150	3;2058	3;2058
Q76NQ0	Q76NQ0	Q76NQ0	3	3	3	Dolichyl-diphosphooligosaccharide--protein glycosyltransferase subunit 1			1	3	3	3	7.4	7.4	7.4	51.709	458	458	0	19.296	22143000	22143000	2	2	123	360;754;798	True;True;True	369;775;819	430;956;1015	689;1723;1821	689;1723;1821
Q7JXC4	Q7JXC4	Q7JXC4	2	2	2		P32		1	2	2	2	7.2	7.2	7.2	28.975	263	263	0	13.138	0	0	2	2	124	272;503	True;True	281;518	322;613	523;986	523;986
Q7JXZ2	Q7JXZ2	Q7JXZ2	3	3	3		Eip55E		1	3	3	3	9.4	9.4	9.4	42.988	393	393	0	18.094	13607000	13607000	4	4	125	520;587;756	True;True;True	535;606;777	632;745;958	1010;1371;1725;1726	1010;1371;1725
Q7K0D8	Q7K0D8	Q7K0D8	1	1	1		Nup50		1	1	1	1	3.5	3.5	3.5	59.434	564	564	0.0055249	5.7741	1974600	1974600	1	1	126	593	True	612	756	1388	1388
Q7K0E6	Q7K0E6	Q7K0E6	1	1	1		Aats-asp		1	1	1	1	4.7	4.7	4.7	59.058	531	531	0.0058824	5.9373	3650200	3650200	1	1	127	60	True	61	68	103	103
Q7K485	Q7K485	Q7K485	2	2	2		cathD		1	2	2	2	5.9	5.9	5.9	42.472	392	392	0	13.304	5326100	5326100	2	2	131	737;914	True;True	758;936	937;1156	1701;2066	1701;2066
Q7KMQ0	Q7KMQ0;M9PC18;Q9VQN8	Q7KMQ0	4;1;1	4;1;1	4;1;1		Rpt1		3	4	4	4	11.1	11.1	11.1	48.541	433	433;523;523	0	24.013	13970000	13970000	4	4	133	210;237;299;605	True;True;True;True	218;246;308;624	250;283;356;771	385;457;572;1415	385;457;572;1415
Q7KSQ0	Q7KSQ0	Q7KSQ0	2	2	2		sea		1	2	2	2	5	5	5	34.093	317	317	0	11.606	11875000	11875000	2	2	134	216;773	True;True	224;794	259;981	406;1764	406;1764
Q7KW39	Q7KW39	Q7KW39	5	5	5	Probable methylmalonate-semialdehyde dehydrogenase [acylating], mitochondrial	CG17896		1	5	5	5	13.1	13.1	13.1	55.972	520	520	0	34.034	41222000	41222000	6	6	136	81;750;767;793;843	True;True;True;True;True	83;771;788;814;864	95;952;974;1010;1073	142;143;1718;1754;1814;1931	143;1718;1754;1814;1931
Q8IMI7	Q8IMI7;Q9VA91	Q8IMI7;Q9VA91	3;3	3;3	3;3	40S ribosomal protein S7	RpS7	;	2	3	3	3	15.5	15.5	15.5	22.17	194	194;194	0	19.401	31315000	31315000	4	4	137	359;380;812	True;True;True	368;392;833	429;459;1040	687;688;735;1880	688;735;1880
Q8IPB1	Q8IPB1;Q9V3I1	Q8IPB1;Q9V3I1	2;2	2;2	2;2		dUTPase	;	2	2	2	2	13.8	13.8	13.8	18.485	174	174;188	0	15.399	5118200	5118200	1	1	138	502;733	True;True	517;754	612;933	985;1697	985;1697
Q9W2P1	Q9W2P1;Q8MLX0	Q9W2P1;Q8MLX0	1;1	1;1	1;1	Guanylate cyclase		;	2	1	1	1	1.2	1.2	1.2	123.87	1096	1096;1161	0.0054945	5.771	231250000	231250000	4	4	140	350	True	359	416;417;418	665;666;667;668	668
Q8T060	Q8T060;Q9VUR3	Q8T060;Q9VUR3	1;1	1;1	1;1	Probable aminoacyl tRNA synthase complex-interacting multifunctional protein 2	CG12304-RB;CG12304	;	2	1	1	1	3.3	3.3	3.3	33.241	301	301;334	0	6.2418	700300	700300	0	0	141	116	True	118	136	200	200
Q9GU68	Q9GU68	Q9GU68	1	1	1	Eukaryotic translation initiation factor 5A	eIF-5A		1	1	1	1	6.9	6.9	6.9	17.591	159	159	0.005618	5.8057	6575000	6575000	2	2	144	11	True	11	12	19;20	20
X2JF59	X2JF59;Q9V3P0	X2JF59;Q9V3P0	3;3	3;3	3;3	Peroxiredoxin 1	Jafrac1	;	2	3	3	3	17	17	17	21.738	194	194;194	0	19.976	17755000	17755000	3	3	145	278;514;610	True;True;True	287;529;629	330;625;778	535;999;1425	535;999;1425
Q9V3Z4	Q9V3Z4	Q9V3Z4	1	1	1		Rpn5		1	1	1	1	2	2	2	57.747	502	502	0.0057803	5.8921	2652900	2652900	1	1	146	326	True	335	387	615	615
Q9V434	Q9V434	Q9V434	2	2	2		Aats-asn		1	2	2	2	3.4	3.4	3.4	63.931	558	558	0	11.698	14837000	14837000	2	2	147	383;721	True;True	395;742	463;916	742;1657	742;1657
Q9V455	Q9V455	Q9V455	1	1	1	Importin subunit alpha	Kap-alpha3		1	1	1	1	4.1	4.1	4.1	56.989	514	514	0.0056497	5.8707	4513000	4513000	1	1	148	799	True	820	1016	1822	1822
Q9V9A7	Q9V9A7	Q9V9A7	27	27	27	Probable methylcrotonoyl-CoA carboxylase beta chain, mitochondrial	l(2)04524		1	27	27	27	47.9	47.9	47.9	62.648	578	578	0	323.31	5832400000	5669000000	152	152	149	5;7;24;50;58;59;147;148;183;189;224;244;267;375;391;417;422;468;486;521;525;546;592;602;776;807;881	True;True;True;True;True;True;True;True;True;True;True;True;True;True;True;True;True;True;True;True;True;True;True;True;True;True;True	5;7;24;50;51;59;60;151;152;189;190;196;232;233;253;276;387;403;430;435;483;501;536;540;562;563;611;621;797;828;903	5;7;8;26;27;54;55;56;65;66;67;173;174;175;218;219;220;226;227;268;269;291;292;316;453;471;502;503;510;511;566;567;568;589;590;591;592;633;634;638;663;664;753;754;755;766;767;768;985;986;987;1034;1035;1119	5;6;7;9;10;11;12;13;14;39;40;41;80;81;82;83;84;85;86;97;98;99;100;101;102;261;262;263;264;265;266;267;337;338;339;340;341;342;343;344;345;353;354;355;356;420;421;422;423;424;425;426;427;428;429;471;472;473;474;475;515;724;725;726;753;754;799;800;801;802;813;814;815;816;817;818;819;820;904;905;906;907;908;909;910;911;912;947;948;949;950;951;952;953;954;955;1011;1012;1013;1014;1015;1016;1022;1023;1…	5;13;41;82;99;101;261;267;341;355;425;473;515;725;753;801;815;905;954;1013;1022;1067;1387;1404;1773;1866;1995	17;18;19;20	48;440;479;527
Q9V9S8	Q9V9S8	Q9V9S8	1	1	1	Ferrochelatase, mitochondrial	FeCh		1	1	1	1	2.1	2.1	2.1	43.597	384	384	0.0060976	6.0669	3741000	3741000	1	1	150	455	True	469	550	880	880
Q9V9W2	Q9V9W2;Q9V9W3	Q9V9W2;Q9V9W3	2;2	2;2	2;2		RpL6	;	2	2	2	2	8.6	8.6	8.6	27.697	243	243;262	0	11.048	5819000	5819000	2	2	152	742;847	True;True	763;868	942;1078	1706;1938	1706;1938
Q9VBU9	Q9VBU9	Q9VBU9	3	3	3	40S ribosomal protein S27	RpS27		1	3	3	3	38.1	38.1	38.1	9.364	84	84	0	19.539	35369000	35369000	4	4	154	114;501;516	True;True;True	116;516;531	132;133;611;627	196;197;984;1001	196;984;1001
Q9VEX6	Q9VEX6	Q9VEX6	7	7	7		bor		1	7	7	7	12.1	12.1	12.1	68.36	604	604	0	42.089	35712000	35712000	8	8	156	4;37;62;212;345;527;912	True;True;True;True;True;True;True	4;37;63;220;354;542;934	4;40;70;253;409;640;1154	4;56;107;108;389;652;1027;2063	4;56;108;389;652;1027;2063
Q9VFV9	Q9VFV9	Q9VFV9	3	3	3		Droj2		1	3	3	3	11.4	11.4	11.4	45.23	403	403	0	19.855	16893000	16893000	4	4	157	34;215;753	True;True;True	34;223;774	37;258;955	53;405;1721;1722	53;405;1722
Q9VGW7	Q9VGW7	Q9VGW7	1	1	1		Art1		1	1	1	1	3.5	3.5	3.5	42.805	376	376	0	7.0253	2851400	2851400	1	1	159	255	True	264	304	490	490
Q9VHL2	Q9VHL2	Q9VHL2	6	6	6		Tcp-1eta		1	6	6	6	12.5	12.5	12.5	59.386	544	544	0	36.179	22335000	22335000	5	5	160	225;348;473;629;684;739	True;True;True;True;True;True	234;357;488;648;704;760	270;412;413;573;574;801;866;939	430;655;656;919;920;1457;1560;1703	430;655;920;1457;1560;1703
Q9VJ19	Q9VJ19	Q9VJ19	2	2	2		RpL30		1	2	2	2	27.9	27.9	27.9	12.234	111	111	0	12.995	6031200	6031200	2	2	161	512;736	True;True	527;757	623;936	997;1700	997;1700
Q9VJC6	Q9VJC6	Q9VJC6	2	2	2		Dhc36C		1	2	2	2	0.5	0.5	0.5	461.15	4024	4024	0	11.314	66292000	36085000	8	8	162	653;861	True;True	673;882	828;829;830;1095	1495;1496;1497;1498;1499;1500;1501;1959	1496;1959
Q9VJD1	Q9VJD1	Q9VJD1	3	3	3		GCS2beta		1	3	3	3	6	6	6	61.539	548	548	0	18.545	7030300	7030300	3	3	163	21;204;392	True;True;True	21;212;404	23;244;472	35;377;755	35;377;755
Q9VJJ0	Q9VJJ0	Q9VJJ0	1	1	1	Proteasome subunit beta type	Prosbeta4		1	1	1	1	4	4	4	22.481	201	201	0	6.4121	782270	782270	0	0	164	529	True	545	643	1035	1035
X2J5E8	X2J5E8;Q9VL78	X2J5E8;Q9VL78	1;1	1;1	1;1	FK506-binding protein 59	FKBP59	;	2	1	1	1	3.2	3.2	3.2	48.795	439	439;439	0.0054645	5.7694	1402900	1402900	1	1	165	254	True	263	303	489	489
Q9VLC5	Q9VLC5	Q9VLC5	7	7	7		Aldh		1	7	7	7	13.7	13.7	13.7	57.018	520	520	0	45.177	46396000	46396000	9	9	166	146;401;433;464;746;801;862	True;True;True;True;True;True;True	150;414;446;479;767;822;883	172;483;524;561;947;1018;1096	258;259;260;772;837;897;1712;1824;1960	260;772;837;897;1712;1824;1960
Q9VN21	Q9VN21	Q9VN21	1	1	1		lost		1	1	1	1	2.4	2.4	2.4	59.742	545	545	0.0057471	5.8872	4512600	4512600	1	1	167	0	True	0	0	0	0
Q9VPN5	Q9VPN5	Q9VPN5	2	2	2		Hop		1	2	2	2	4.3	4.3	4.3	55.697	490	490	0	11.796	2422800	2422800	2	2	168	777;883	True;True	798;905	988;1121	1780;1998	1780;1998
Q9VPR1	Q9VPR1	Q9VPR1	1	1	1		Tspo		1	1	1	1	5.9	5.9	5.9	20.124	185	185	0	6.5033	10887000	10887000	1	1	169	15	True	15	16	24	24
Q9VSA3	Q9VSA3	Q9VSA3	1	1	1	Probable medium-chain specific acyl-CoA dehydrogenase, mitochondrial	CG12262		1	1	1	1	3.1	3.1	3.1	45.871	419	419	0.0055556	5.7805	2075200	2075200	1	1	170	404	True	417	487	778	778
Q9VTP4	Q9VTP4	Q9VTP4	1	1	1	60S ribosomal protein L10a-2	RpL10Ab		1	1	1	1	6	6	6	24.273	217	217	0	6.7743	2903500	2903500	0	0	171	722	True	743	917	1658	1658
Q9VUZ0	Q9VUZ0	Q9VUZ0	1	1	1	Translocon-associated protein subunit beta	SsRbeta		1	1	1	1	12.6	12.6	12.6	21.206	190	190	0	7.4781	6976800	6976800	2	2	172	510	True	525	621	994;995	994
Q9VV75	Q9VV75	Q9VV75	5	5	5		UQCR-C2		1	5	5	5	15.5	15.5	15.5	45.415	440	440	0	60.979	54368000	54368000	9	9	173	83;518;552;794;859	True;True;True;True;True	85;533;569;815;880	97;98;630;692;693;1011;1093	145;146;147;148;1006;1294;1295;1815;1816;1957	146;1006;1295;1816;1957
Q9VVU2	Q9VVU2	Q9VVU2	1	1	1		RpL26		1	1	1	1	6	6	6	17.281	149	149	0	6.3197	1681100	1681100	1	1	174	305	True	314	362	579	579
Q9VW54	Q9VW54	Q9VW54	1	1	1		Rpn1		1	1	1	1	1.6	1.6	1.6	102.28	919	919	0	7.3918	4259000	4259000	1	1	175	80	True	82	94	141	141
Q9VWH4	Q9VWH4	Q9VWH4	4	4	4	Probable isocitrate dehydrogenase [NAD] subunit alpha, mitochondrial	l(1)G0156		1	4	4	4	13.3	13.3	13.3	40.844	377	377	0	26.956	12418000	12418000	4	4	176	218;316;763;800	True;True;True;True	226;325;784;821	261;376;967;1017	408;599;1743;1823	408;599;1743;1823
Q9VWZ3	Q9VWZ3	Q9VWZ3	2	2	2		Dhc16F		1	2	2	2	0.5	0.5	0.5	469.07	4081	4081	0	10.855	14289000000	14289000000	2	2	177	86;637	True;True	88;657	102;810	152;1471	152;1471	25	1682
Q9VXQ5	Q9VXQ5	Q9VXQ5	8	8	8		Tcp-1zeta		1	8	8	8	15.9	15.9	15.9	58.246	533	533	0	53.011	41178000	41178000	9	9	178	49;152;271;591;656;740;752;851	True;True;True;True;True;True;True;True	49;158;280;610;676;761;773;872	53;183;321;751;752;833;940;954;1083	79;285;521;522;1378;1379;1505;1704;1720;1945	79;285;522;1379;1505;1704;1720;1945
Q9VXW7	Q9VXW7	Q9VXW7	16	16	16		gce		1	16	16	16	20.5	20.5	20.5	105.84	959	959	0	148.86	248270000	248270000	37	37	179	206;211;287;303;343;569;570;620;658;662;675;695;696;698;771;890	True;True;True;True;True;True;True;True;True;True;True;True;True;True;True;True	214;219;296;312;352;586;587;639;678;682;695;716;717;719;792;912	246;251;252;340;341;360;407;719;720;721;790;835;839;840;853;883;884;885;886;888;978;979;1131	379;380;386;387;388;551;552;553;576;648;649;650;1334;1335;1336;1337;1338;1441;1507;1514;1515;1516;1538;1594;1595;1596;1597;1598;1599;1601;1602;1758;1759;1760;2025;2026;2027	380;386;553;576;649;1336;1338;1441;1507;1515;1538;1595;1598;1602;1758;2026
Q9W1B9	Q9W1B9	Q9W1B9	2	2	2		RpL12		1	2	2	2	15.2	15.2	15.2	17.673	165	165	0	14.036	17897000	17897000	3	3	180	199;347	True;True	207;356	238;411	370;371;654	371;654
R9Q794	R9Q794;Q9W5R8	R9Q794;Q9W5R8	1;1	1;1	1;1	60S ribosomal protein L5	RpL5	;	2	1	1	1	4.3	4.3	4.3	34.036	299	299;299	0.0060606	6.0656	1609600	1609600	1	1	182	29	True	29	32	47	47
Q9XYU0	Q9XYU0	Q9XYU0	2	2	2	DNA replication licensing factor Mcm7	Mcm7		1	2	2	2	3.9	3.9	3.9	81.283	720	720	0	17.578	13207000	13207000	3	3	183	495;857	True;True	510;878	602;603;1091	969;970;1955	969;1955
X2JB48	X2JB48;Q26365;O62526	X2JB48;Q26365	17;16;3	17;16;3	17;16;3	ADP,ATP carrier protein	sesB	;	3	17	17	17	51.5	51.5	51.5	32.909	299	299;312;307	0	118.33	863010000	863010000	33	33	185	9;67;100;101;149;187;242;275;282;297;406;477;584;627;654;730;894	True;True;True;True;True;True;True;True;True;True;True;True;True;True;True;True;True	9;68;102;103;153;194;251;284;291;306;419;492;603;646;674;751;916	10;76;116;117;176;224;289;326;327;334;354;489;579;740;741;742;798;831;927;1135	16;17;115;172;173;174;175;268;269;350;351;467;468;469;528;529;530;540;541;570;780;926;1366;1367;1368;1453;1454;1502;1503;1672;2031;2032;2033	16;115;172;175;268;350;469;529;541;570;780;926;1366;1453;1503;1672;2031

## Sheet: UAS-Met-BirA + UAS-Gce-BirA +JH
LC-MS analysis of competitive eluted proteins
Leading Protein	Protein IDs	Majority protein IDs	Peptide counts (all)	Peptide counts (razor+unique)	Peptide counts (unique)	Protein names	Gene names	Fasta headers	Number of proteins	Peptides	Razor + unique peptides	Unique peptides	Sequence coverage [%]	Unique + razor sequence coverage [%]	Unique sequence coverage [%]	Mol. weight [kDa]	Sequence length	Sequence lengths	Q-value	Score	Intensity	LFQ intensity	MS/MS count	MS/MS count	id	Peptide IDs	Peptide is razor	Mod. peptide IDs	Evidence IDs	MS/MS IDs	Best MS/MS	Oxidation (M) site IDs	Oxidation (M) site positions
A0A023GQA5	A0A023GQA5;P24156	A0A023GQA5;P24156	4;4	4;4	4;4	Protein l(2)37Cc	l(2)37Cc	;	2	4	4	4	14.9	14.9	14.9	30.383	276	276;276	0	23.029	9940800	9940800	4	4	0	438;495;641;660	True;True;True;True	457;514;664;683	572;642;826;846	1055;1171;1524;1555	1055;1171;1524;1555
A0A0B4JD11	A0A0B4JD11;Q9NJH0	A0A0B4JD11;Q9NJH0	4;4	4;4	4;4	Elongation factor 1-gamma	Ef1gamma	;	2	4	4	4	10	10	10	48.967	431	431;431	0	30.031	30517000	30517000	4	4	1	29;227;370;479	True;True;True;True	29;236;383;499	33;261;445;626	54;422;709;1145	54;422;709;1145
A0A0B4K6N1	A0A0B4K6N1;Q8MLY8	A0A0B4K6N1;Q8MLY8	1;1	1;1	1;1	40S ribosomal protein S8	RpS8	;	2	1	1	1	6.2	6.2	6.2	23.759	208	208;208	0	11.839	4594900	4594900	1	1	2	623	True	646	807	1497	1497
A0A0B4K6U6	A0A0B4K6U6;Q08473	A0A0B4K6U6;Q08473	1;1	1;1	1;1	RNA-binding protein squid	sqd	;	2	1	1	1	3.2	3.2	3.2	33.054	308	308;344	0	6.4527	6779600	6779600	2	2	3	686	True	710	880	1610;1611	1611
A0A0B4K7G4	A0A0B4K7G4;P13469	A0A0B4K7G4;P13469	3;3	3;3	3;3	DNA-binding protein modulo	mod	;	2	3	3	3	8.5	8.5	8.5	60.309	542	542;542	0	24.848	12780000	12780000	3	3	4	21;34;614	True;True;True	21;34;637	24;38;792	39;59;1426	39;59;1426
A0A0B4K8A5	A0A0B4K8A5;Q9W2F2	A0A0B4K8A5;Q9W2F2	1;1	1;1	1;1	Protein mahjong	mahj	;	2	1	1	1	0.7	0.7	0.7	172.08	1544	1544;1544	0	8.3845	12501000	12501000	2	2	5	363	True	376	437	692;693	692
A0A0B4KEH0	A0A0B4KEH0;P29310	A0A0B4KEH0;P29310	3;3	2;2	2;2	14-3-3 protein zeta	14-3-3zeta	;	2	3	2	2	10.9	7.7	7.7	28.227	248	248;248	0	13.148	95395000	95395000	2	2	6	423;634;694	False;True;True	439;657;718	548;819;888	1021;1514;1619	1021;1514;1619
A0A0B4KFZ9	A0A0B4KFZ9;P84040	A0A0B4KFZ9;P84040	8;8	8;8	8;8	Histone H4	His4r;His4	;	2	8	8	8	52.4	52.4	52.4	11.381	103	103;103	0	59.229	449450000	444370000	21	21	7	77;91;92;299;331;601;602;627	True;True;True;True;True;True;True;True	78;93;94;310;343;623;624;625;650	85;86;103;104;105;353;395;774;775;776;777;778;811	131;132;133;134;135;136;160;161;162;163;569;570;625;1400;1401;1402;1403;1404;1405;1501;1502;1503	133;160;162;569;625;1402;1404;1502	0	85
A0A0B4KGK0	A0A0B4KGK0;Q27869	A0A0B4KGK0;Q27869	1;1	1;1	1;1	Protein-L-isoaspartate O-methyltransferase;Protein-L-isoaspartate(D-aspartate) O-methyltransferase	Pcmt	;	2	1	1	1	5.4	5.4	5.4	21.92	203	203;226	0	7.9562	2671300	2671300	1	1	8	538	True	559	697	1278	1278
A0A0B4KH25	A0A0B4KH25;P08985;Q4AB57;P84051	A0A0B4KH25;P08985	3;3;1;1	3;3;1;1	3;3;1;1	Histone H2A;Histone H2A.v	His2Av	;	4	3	3	3	20.6	20.6	20.6	14.981	141	141;141;124;124	0	18.314	70494000	70494000	5	5	9	18;192;319	True;True;True	18;200;331	21;220;379	34;35;36;362;602	34;362;602
A0A0B4KI24	A0A0B4KI24;Q27415	A0A0B4KI24;Q27415	1;1	1;1	1;1	Nucleoplasmin-like protein	Nlp	;	2	1	1	1	7.9	7.9	7.9	16.996	152	152;152	0	6.9641	4430700	4430700	1	1	10	61	True	62	68	106	106
A0A0B4LEY6	A0A0B4LEY6;Q94518	A0A0B4LEY6;Q94518	1;1	1;1	1;1	Nascent polypeptide-associated complex subunit alpha	Nacalpha	;	2	1	1	1	6.9	6.9	6.9	23.021	217	217;217	0	8.6901	5679800	5679800	1	1	11	255	True	264	293	471	471
A0A0B4LF26	A0A0B4LF26;Q7K550	A0A0B4LF26;Q7K550	2;2	2;2	2;2	Eukaryotic translation initiation factor 3 subunit J	Adam	;	2	2	2	2	11	11	11	26.567	236	236;236	0	12.441	6180400	6180400	2	2	12	342;554	True;True	354;575	409;718	645;1322	645;1322
A0A0B4LFD2	A0A0B4LFD2;P29845	A0A0B4LFD2;P29845	17;17	17;17	17;17	Heat shock 70 kDa protein cognate 5	Hsc70-5	;	2	17	17	17	25.9	25.9	25.9	74.065	686	686;686	0	113.94	111970000	111970000	22	22	13	33;54;72;99;152;153;314;402;472;489;509;522;524;590;631;633;656	True;True;True;True;True;True;True;True;True;True;True;True;True;True;True;True;True	33;54;73;101;158;159;326;416;492;508;528;542;544;612;654;656;679	37;58;80;112;173;174;175;372;492;618;635;658;675;677;760;761;816;818;842	58;90;124;125;174;280;281;282;593;781;1136;1159;1197;1232;1233;1235;1384;1385;1510;1511;1513;1551	58;90;125;174;280;281;593;781;1136;1159;1197;1232;1235;1385;1511;1513;1551
A0A0B4LFL3	A0A0B4LFL3;O96827	A0A0B4LFL3;O96827	4;4	4;4	4;4	Probable elongation factor 1-beta	Ef1beta	;	2	4	4	4	18.9	18.9	18.9	24.247	222	222;222	0	27.958	16830000	16830000	5	5	14	9;38;239;388	True;True;True;True	9;38;248;401	10;42;274;472	13;65;439;746;747	13;65;439;746
A0A0B4LFZ4	A0A0B4LFZ4;Q7KN62	A0A0B4LFZ4;Q7KN62	4;4	4;4	4;4	Transitional endoplasmic reticulum ATPase TER94	TER94	;	2	4	4	4	5.6	5.6	5.6	91.923	825	825;801	0	25.797	12034000	12034000	4	4	15	132;146;334;664	True;True;True;True	137;152;346;688	150;167;400;851	241;271;632;1563	241;271;632;1563
A0A0B4LG52	A0A0B4LG52;Q9W237	A0A0B4LG52;Q9W237	3;3	3;3	3;3	40S ribosomal protein S16	RpS16	;	2	3	3	3	18.2	18.2	18.2	16.774	148	148;148	0	17.607	8725100	8725100	3	3	16	36;371;548	True;True;True	36;384;569	40;446;710	63;710;1300	63;710;1300
A0A0B4LGZ5	A0A0B4LGZ5;P46222	A0A0B4LGZ5;P46222	2;2	2;2	2;2	60S ribosomal protein L11	RpL11	;	2	2	2	2	12.5	12.5	12.5	21.112	184	184;184	0	11.86	6537900	6537900	2	2	17	639;676	True;True	662;700	824;866	1521;1585	1521;1585
A0A0B4LH50	A0A0B4LH50;P83967;P53501;P10981;M9PFZ6;P02574;P45891	A0A0B4LH50;P83967;P53501;P10981;M9PFZ6;P02574	10;10;10;10;8;8;1	1;1;1;1;1;1;0	1;1;1;1;1;1;0	Actin, indirect flight muscle;Actin-57B;Actin-87E;Actin, larval muscle	Act87E;Act88F;Act57B;Act79B	;;;;;	7	10	1	1	29.8	4.3	4.3	41.801	376	376;376;376;376;376;376;376	0	7.2239	18025000	18025000	0	0	18	16;58;90;101;102;230;242;542;613;702	False;False;False;False;False;False;False;False;False;True	16;58;91;92;103;104;239;251;563;636;727	19;62;63;101;102;114;115;116;264;278;703;704;790;791;897	31;32;94;95;96;97;157;158;159;176;177;178;179;425;426;446;447;1289;1290;1291;1420;1421;1422;1423;1424;1425;1635	31;95;159;176;178;426;447;1291;1424;1635	1	191
A0A0B4LIJ0	A0A0B4LIJ0;P48601	A0A0B4LIJ0;P48601	1;1	1;1	1;1	26S protease regulatory subunit 4	Rpt2	;	2	1	1	1	2.7	2.7	2.7	49.323	439	439;439	0	7.4279	2202300	2202300	1	1	19	55	True	55	59	91	91
Q9V3D8	Q9V3D8;A0A0C4FEI8	Q9V3D8;A0A0C4FEI8	1;1	1;1	1;1		grsm	;	2	1	1	1	2.2	2.2	2.2	60.169	558	558;655	0	6.3981	1400500	1400500	1	1	20	598	True	620	770	1396	1396
A1Z6M6	A1Z6M6	A1Z6M6	4	4	4		Dpit47		1	4	4	4	10.9	10.9	10.9	46.906	396	396	0	27.899	19919000	19919000	5	5	21	78;481;553;624	True;True;True;True	79;501;574;647	87;628;717;808	137;1147;1148;1321;1498	137;1148;1321;1498
A1Z784	A1Z784;Q7JV23;A8DY67	A1Z784;Q7JV23;A8DY67	12;11;11	12;11;11	12;11;11		ACC	;;	3	12	12	12	5.9	5.9	5.9	278.59	2482	2482;2323;2348	0	74.872	39865000	39865000	15	15	22	42;75;98;117;131;170;183;191;360;477;570;599	True;True;True;True;True;True;True;True;True;True;True;True	42;76;100;121;136;177;191;199;373;497;591;621	46;83;111;133;149;195;211;219;434;624;735;771	70;128;129;173;212;213;239;240;316;348;361;687;1143;1344;1397	70;129;173;212;239;316;348;361;687;1143;1344;1397
A1Z9E3	A1Z9E3	A1Z9E3	2	2	2	Elongation factor Tu	EfTuM		1	2	2	2	6.5	6.5	6.5	53.992	489	489	0	14.071	9558300	9558300	2	2	23	209;221	True;True	217;230	239;255	390;415	390;415
Q7JYK1	Q7JYK1;R9PY16;Q9W418;A4V1F9;P18101;P15357;P0CG69	Q7JYK1;R9PY16;Q9W418;A4V1F9;P18101;P15357;P0CG69	2;2;2;2;2;2;2	2;2;2;2;2;2;2	2;2;2;2;2;2;2	Ubiquitin-60S ribosomal protein L40;Ubiquitin;60S ribosomal protein L40;Ubiquitin-40S ribosomal protein S27a;Ubiquitin;40S ribosomal protein S27a;Polyubiquitin;Ubiquitin	RpL40;Ubi-p5E;Ubi-p63E;RpS27A	;;;;;;	7	2	2	2	19.5	19.5	19.5	14.729	128	128;301;534;763;128;156;763	0	16.027	7443400	7443400	2	2	24	150;560	True;True	156;581	171;724	277;1328	277;1328
A4V2K7	A4V2K7;P22058	A4V2K7;P22058	1;1	1;1	1;1	Chromosomal protein D1	D1	;	2	1	1	1	4.5	4.5	4.5	37	355	355;355	0	9.9949	3257200	3257200	1	1	25	502	True	521	649	1180	1180
A4V303	A4V303;P48605	A4V303;P48605	6;6	6;6	6;6	T-complex protein 1 subunit gamma	Cctgamma	;	2	6	6	6	11.8	11.8	11.8	59.394	544	544;544	0	39.149	38726000	38726000	7	7	26	7;254;290;424;551;563	True;True;True;True;True;True	7;263;301;440;572;584	8;292;342;549;550;715;727	11;470;552;1022;1023;1319;1331	11;470;552;1022;1319;1331
A4V391	A4V391;P12613	A4V391;P12613	10;10	10;10	10;10	T-complex protein 1 subunit alpha	T-cp1	;	2	10	10	10	18.7	18.7	18.7	59.556	557	557;557	0	69.893	45158000	45158000	14	14	27	1;100;148;217;359;528;530;539;571;691	True;True;True;True;True;True;True;True;True;True	1;102;154;226;372;548;550;560;592;715	1;113;169;250;432;433;683;686;698;699;736;885	1;175;274;407;684;685;686;1250;1251;1257;1279;1280;1345;1616	1;175;274;407;686;1251;1257;1279;1345;1616
A4V4A5	A4V4A5;Q9VZ23	A4V4A5;Q9VZ23	4;4	4;4	4;4	GTP-binding nuclear protein Ran	Ran;ran	;	2	4	4	4	20.8	20.8	20.8	24.708	216	216;216	0	25.066	26165000	26165000	5	5	28	69;176;425;616	True;True;True;True	70;184;441;639	77;203;551;800	117;118;330;1024;1485	118;330;1024;1485
Q0E924	Q0E924;A8DYI7;A8DYI6	Q0E924;A8DYI7;A8DYI6	4;4;4	4;4;4	4;4;4		Phb2	;;	3	4	4	4	16.4	16.4	16.4	33.066	299	299;303;338	0	28.058	11509000	11509000	4	4	29	200;307;642;644	True;True;True;True	208;319;665;667	229;362;827;829	376;582;1525;1528	376;582;1525;1528
B5RJQ0	B5RJQ0;Q95028	B5RJQ0;Q95028	3;3	3;3	3;3	L-lactate dehydrogenase	ImpL3	;	2	3	3	3	10.2	10.2	10.2	35.537	332	332;332	0	24.422	15686000	15686000	3	3	30	338;452;632	True;True;True	350;471;655	404;405;590;817	639;640;1086;1512	639;1086;1512
Q7KUB0	Q7KUB0;Q8IQA7;Q9VSI6;Q7KUB1;B7Z0E0	Q7KUB0;Q8IQA7;Q9VSI6;Q7KUB1;B7Z0E0	3;3;3;3;3	3;3;3;3;3	3;3;3;3;3	Isocitrate dehydrogenase [NADP]	Idh	;;;;	5	3	3	3	8.2	8.2	8.2	46.66	416	416;437;450;469;479	0	17.427	4673900	4673900	3	3	31	57;487;596	True;True;True	57;506;618	61;633;767	93;1156;1392	93;1156;1392
X2JCX8	X2JCX8;C0HKA1;C0HKA0	X2JCX8;C0HKA1;C0HKA0	2;2;2	2;2;2	2;2;2		RpS14b	;;	3	2	2	2	15.9	15.9	15.9	16.265	151	151;151;151	0	14.68	5923900	5923900	2	2	32	256;578	True;True	265;599	294;745	472;1361	472;1361
C7LA75	C7LA75;P11147;Q8I0E9	C7LA75;P11147	26;26;1	26;26;1	21;21;0	Heat shock 70 kDa protein cognate 4	Hsc70-4-RA;Hsc70-4	;	3	26	26	21	43.9	43.9	34.3	71.131	651	651;651;555	0	240.44	806450000	800670000	72	72	33	47;52;73;139;166;168;246;258;259;279;317;330;362;377;390;401;434;455;529;533;540;589;591;603;621;674	True;True;True;True;True;True;True;True;True;True;True;True;True;True;True;True;True;True;True;True;True;True;True;True;True;True	47;52;74;144;173;175;255;267;268;288;329;342;375;390;403;415;453;474;549;553;561;611;613;626;644;698	51;56;81;158;190;192;193;282;283;296;297;298;299;323;324;376;377;394;436;454;474;475;490;491;567;595;684;685;690;700;701;759;762;779;780;805;862;863;864	79;80;86;87;88;126;255;256;303;304;306;307;308;309;310;311;312;313;314;453;454;455;456;477;478;479;480;481;522;523;524;598;599;600;624;690;691;723;749;750;751;752;778;779;780;1047;1048;1093;1252;1253;1254;1255;1256;1264;1281;1282;1283;1284;1285;1383;1386;1406;1407;1408;1409;1494;1495;1578;1579;1580;1581;1582	80;87;126;256;304;306;455;479;481;524;599;624;690;723;749;778;1047;1093;1253;1264;1284;1383;1386;1407;1494;1578
C9QP42	C9QP42;Q02748;Q9VHS8	C9QP42;Q02748	13;13;2	13;13;2	13;13;2	Eukaryotic initiation factor 4A	eIF-4a	;	3	13	13	13	33.3	33.3	33.3	45.878	403	403;403;399	0	93.522	108190000	108190000	21	21	34	20;94;110;118;138;195;210;219;284;315;321;640;669	True;True;True;True;True;True;True;True;True;True;True;True;True	20;96;113;122;143;203;218;228;295;327;333;663;693	23;107;125;134;157;223;240;241;253;335;336;373;374;381;825;856	38;166;167;196;214;215;253;254;366;391;392;393;412;542;543;544;594;595;604;1522;1523;1569	38;166;196;214;253;366;391;412;544;594;604;1523;1569
E1JGZ9	E1JGZ9;Q9XZJ4	E1JGZ9;Q9XZJ4	3;3	3;3	3;3	Proteasome subunit alpha type;Proteasome subunit alpha type-6	Prosalpha1	;	2	3	3	3	14.3	14.3	14.3	27.162	244	244;244	0	17.317	8516900	8516900	3	3	51	19;416;565	True;True;True	19;432;586	22;537;729	37;1002;1333	37;1002;1333
E1JHA4	E1JHA4;P48809	E1JHA4;P48809	1;1	1;1	1;1	Heterogeneous nuclear ribonucleoprotein 27C	Hrb27C	;	2	1	1	1	4.8	4.8	4.8	44.769	421	421;421	0	6.7001	2730400	2730400	1	1	52	40	True	40	44	67	67
E1JIL4	E1JIL4;Q24572	E1JIL4;Q24572	1;1	1;1	1;1	Probable histone-binding protein Caf1	Caf1	;	2	1	1	1	1.9	1.9	1.9	48.563	429	429;430	0	6.1417	1447900	1447900	1	1	53	594	True	616	765	1389	1389
E2QD65	E2QD65;P39018	E2QD65;P39018	3;3	3;3	3;3	40S ribosomal protein S19a	RpS19a	;	2	3	3	3	17.3	17.3	17.3	17.291	156	156;156	0	17.256	14090000	14090000	4	4	54	31;252;520	True;True;True	31;261;540	35;290;673	56;468;1228;1229	56;468;1229
F3YDH0	F3YDH0;P29844	F3YDH0;P29844	12;12	9;9	9;9	Heat shock 70 kDa protein cognate 3	Hsc70-3	;	2	12	9	9	22.1	16.2	16.2	72.26	656	656;656	0	66.219	58175000	58175000	13	13	55	74;87;109;157;279;303;305;384;401;409;433;621	True;True;True;True;False;True;True;True;False;True;True;False	75;88;112;164;288;314;317;397;415;424;452;644	82;98;124;180;323;324;357;360;467;490;491;527;566;805	127;153;154;194;195;291;522;523;524;574;575;580;741;778;779;780;985;986;1046;1494;1495	127;153;194;291;524;574;580;741;778;986;1046;1494
G3M3A2	G3M3A2;Q06559	G3M3A2;Q06559	12;12	12;12	12;12	40S ribosomal protein S3	RpS3	;	2	12	12	12	49.2	49.2	49.2	27.471	246	246;246	0	80.615	118670000	118670000	20	20	56	12;137;143;190;212;291;310;326;382;582;646;690	True;True;True;True;True;True;True;True;True;True;True;True	12;142;148;198;220;302;322;338;395;603;669;714	13;156;163;218;244;343;367;387;388;465;749;831;884	19;20;252;264;359;360;398;399;553;587;588;612;613;614;615;739;1368;1532;1533;1615	20;252;264;359;398;553;588;615;739;1368;1533;1615
X2JH42	X2JH42;L0MQ04;Q05825;Q8T4C4	X2JH42;L0MQ04;Q05825	8;8;8;1	8;8;8;1	8;8;8;1	ATP synthase subunit beta;ATP synthase subunit beta, mitochondrial	ATPsynbeta;ATPsyn-beta	;;	4	8	8	8	18.4	18.4	18.4	54.107	505	505;511;505;622	0	55.603	39081000	39081000	9	9	57	264;281;385;387;558;612;638;667	True;True;True;True;True;True;True;True	273;290;398;400;579;635;661;691	304;327;468;469;471;722;789;823;854	488;489;530;742;743;745;1326;1419;1520;1567	489;530;743;745;1326;1419;1520;1567
Q9VUC1	Q9VUC1;M9MSL3	Q9VUC1;M9MSL3	2;2	2;2	2;2		Hsc70Cb	;	2	2	2	2	3.1	3.1	3.1	88.5	804	804;836	0	16.084	4020600	4020600	2	2	58	523;545	True;True	543;566	676;707	1234;1296	1234;1296
M9NE89	M9NE89;P08928	M9NE89;P08928	5;5	5;5	5;5	Lamin Dm0	Lam	;	2	5	5	5	8	8	8	71.299	622	622;622	0	29.164	11162000	11162000	6	6	59	96;383;415;422;622	True;True;True;True;True	98;396;431;438;645	109;466;535;536;547;806	170;740;1000;1001;1020;1496	170;740;1000;1020;1496
M9PB84	M9PB84;P31009	M9PB84;P31009	2;2	2;2	2;2	40S ribosomal protein S2	RpS2	;	2	2	2	2	8.2	8.2	8.2	28.899	267	267;267	0	11.526	3090300	3090300	2	2	60	225;226	True;True	234;235	259;260	420;421	420;421
M9PBL3	M9PBL3;P02828	M9PBL3;P02828	21;21	21;21	21;21	Heat shock protein 83	Hsp83	;	2	21	21	21	29.1	29.1	29.1	81.864	717	717;717	0	171.36	229210000	229210000	38	38	61	10;97;103;121;129;130;141;142;172;243;245;329;346;457;476;516;546;572;577;684;706	True;True;True;True;True;True;True;True;True;True;True;True;True;True;True;True;True;True;True;True;True	10;99;105;125;134;135;146;147;179;252;254;341;358;476;496;535;567;593;598;708;731	11;110;117;137;147;148;160;161;162;197;279;281;393;415;416;597;622;623;666;708;737;738;744;878;901	14;15;171;172;180;218;219;236;237;238;260;261;262;263;318;448;449;452;623;658;659;660;1096;1097;1141;1142;1211;1212;1297;1346;1347;1348;1359;1360;1606;1607;1639;1640	14;171;180;218;237;238;261;262;318;449;452;623;658;1096;1142;1212;1297;1348;1359;1607;1640
M9PCC1	M9PCC1;O18640;M9PB67;Q9VYQ9	M9PCC1;O18640	8;8;2;1	8;8;2;1	8;8;2;1	Guanine nucleotide-binding protein subunit beta-like protein	Rack1	;	4	8	8	8	27	27	27	35.618	318	318;318;109;482	0	59.9	68809000	68809000	13	13	62	30;93;179;394;395;597;671;672	True;True;True;True;True;True;True;True	30;95;187;407;408;619;695;696	34;106;206;482;483;768;769;858;859	55;164;165;338;339;763;764;765;1393;1394;1395;1572;1573	55;165;339;763;764;1393;1572;1573
M9PD75	M9PD75;Q94920	M9PD75;Q94920	3;3	3;3	3;3	Voltage-dependent anion-selective channel	porin	;	2	3	3	3	13.5	13.5	13.5	30.55	282	282;282	0	17.847	15005000	15005000	3	3	63	378;649;703	True;True;True	391;672;728	455;834;898	724;1536;1636	724;1536;1636
Q9W0S4	Q9W0S4;M9PE21;M9PDI0	Q9W0S4;M9PE21;M9PDI0	1;1;1	1;1;1	1;1;1		miple2	;;	3	1	1	1	3.6	3.6	3.6	30.461	279	279;281;282	0	6.2715	25317000	25317000	1	1	64	318	True	330	378	601	601
M9PFF0	M9PFF0;P41126	M9PFF0;P41126	2;2	2;2	2;2	60S ribosomal protein L13	RpL13	;	2	2	2	2	7.8	7.8	7.8	24.951	218	218;218	0	11.552	4984400	4984400	2	2	65	350;606	True;True	363;629	422;783	671;1413	671;1413
M9PG76	M9PG76;P19889	M9PG76;P19889	3;3	3;3	3;3	60S acidic ribosomal protein P0	RpLP0	;	2	3	3	3	12.9	12.9	12.9	34.202	317	317;317	0	21.589	14331000	14331000	4	4	66	66;162;668	True;True;True	67;169;692	74;185;855	114;296;297;1568	114;296;1568
M9PJN8	M9PJN8;P07487;P07486	M9PJN8;P07487	5;5;2	5;5;2	5;5;2	Glyceraldehyde-3-phosphate dehydrogenase;Glyceraldehyde-3-phosphate dehydrogenase 2	Gapdh2	;	3	5	5	5	19.3	19.3	19.3	35.369	332	332;332;332	0	48.319	61078000	61078000	8	8	67	184;189;652;655;670	True;True;True;True;True	192;197;675;678;694	212;217;837;841;857	349;358;1541;1542;1543;1550;1570;1571	349;358;1542;1550;1570
O02649	O02649	O02649	5	5	5	60 kDa heat shock protein, mitochondrial	Hsp60		1	5	5	5	9.4	9.4	9.4	60.808	573	573	0	38.416	25088000	25088000	6	6	68	229;265;335;340;630	True;True;True;True;True	238;274;347;352;653	263;305;401;407;815	424;490;633;634;642;1509	424;490;633;642;1509
O16043	O16043	O16043	1	1	1		Df31		1	1	1	1	6.6	6.6	6.6	18.823	183	183	0	6.3981	1878000	1878000	1	1	69	76	True	77	84	130	130
O62619	O62619	O62619	6	6	6	Pyruvate kinase	PyK		1	6	6	6	13.7	13.7	13.7	57.44	533	533	0	37.099	32223000	32223000	9	9	70	48;68;187;194;372;403	True;True;True;True;True;True	48;69;195;202;385;417	52;76;215;222;447;448;493	81;116;355;364;365;711;712;713;782	81;116;355;365;713;782
O97125	O97125;Q9VG58;Q9BIS2;Q9BIR7;Q8INI8;P82910;P02825;P11146	O97125;Q9VG58;Q9BIS2;Q9BIR7;Q8INI8;P82910;P02825;P11146	3;3;3;3;3;3;3;2	1;1;1;1;1;1;1;1	1;1;1;1;1;1;1;1	Heat shock protein 68;Major heat shock 70 kDa protein Bbb;Major heat shock 70 kDa protein Bb;Major heat shock 70 kDa protein Bc;Major heat shock 70 kDa protein Ba;Major heat shock 70 kDa protein Aa;Major heat shock 70 kDa protein Ab;Heat shock 70 kDa protein cognate 2	Hsp68;Hsp70Bbb;Hsp70Bb;Hsp70Bc;Hsp70Ba;Hsp70Aa;Hsp70Ab;Hsc70-2	;;;;;;;	8	3	1	1	6.8	2.5	2.5	69.743	635	635;641;641;641;641;642;642;633	0	20.361	17940000	17940000	5	5	71	280;529;621	True;False;False	289;549;644	325;326;684;685;805	525;526;527;528;529;1252;1253;1254;1255;1256;1494;1495	526;1253;1494
Q4ABD8	Q4ABD8;Q4AB54;P02255;Q4AB94;Q4ABE3	Q4ABD8;Q4AB54;P02255;Q4AB94;Q4ABE3	3;3;3;2;2	3;3;3;2;2	2;2;2;1;1	Histone H1	His1:CG33807;His1:CG33861;His1;His1:CG33834;His1:CG33801	;;;;	5	3	3	2	19.9	19.9	11.3	26.36	256	256;256;256;256;256	0	19.214	16151000	16151000	2	2	72	204;312;484	True;True;True	212;324	234;369	383;590	383;590
P02283	P02283	P02283	4	4	4	Histone H2B	His2B		1	4	4	4	24.4	24.4	24.4	13.696	123	123	0	27.846	173030000	173030000	12	12	73	151;316;361;470	True;True;True;True	157;328;374;489	172;375;435;614;615	278;279;596;597;688;689;1126;1127;1128;1129;1130;1131	278;596;688;1130
X2JCP8	X2JCP8;P10987;P02572	X2JCP8;P10987;P02572	11;11;11	11;11;11	2;2;2	Actin-5C;Actin-42A	Act5C;Act42A	;;	3	11	11	2	31.9	31.9	6.4	41.821	376	376;376;376	0	97.606	332830000	326170000	30	30	74	16;58;90;101;102;134;230;242;445;542;613	True;True;True;True;True;True;True;True;True;True;True	16;58;91;92;103;104;139;239;251;464;563;636	19;62;63;101;102;114;115;116;152;264;278;582;583;703;704;790;791	31;32;94;95;96;97;157;158;159;176;177;178;179;244;245;425;426;446;447;1069;1070;1071;1289;1290;1291;1420;1421;1422;1423;1424;1425	31;95;159;176;178;244;426;447;1071;1291;1424	1	191
P06605	P06605;P06603;P06604;P06606	P06605;P06603;P06604	12;12;7;1	12;12;7;1	12;12;7;1	Tubulin alpha-3 chain;Tubulin alpha-1 chain;Tubulin alpha-2 chain	alphaTub84D;alphaTub84B;alphaTub85E	;;	4	12	12	12	31.8	31.8	31.8	49.89	450	450;450;449;462	0	135.86	341790000	339770000	33	33	75	59;111;119;120;135;271;380;420;458;559;600;700	True;True;True;True;True;True;True;True;True;True;True;True	59;114;123;124;140;280;393;436;477;580;622;724;725	64;65;126;135;136;153;312;313;463;544;545;598;599;723;772;773;894;895	98;99;100;197;198;199;216;217;246;247;248;498;499;500;501;502;503;504;505;736;737;1015;1016;1017;1018;1098;1099;1327;1398;1399;1631;1632;1633	98;198;216;217;247;504;736;1016;1099;1327;1399;1632	13	313
P08736	P08736;A4V3Q6;P05303	P08736;A4V3Q6;P05303	9;6;6	9;6;6	9;6;6	Elongation factor 1-alpha 1;Elongation factor 1-alpha;Elongation factor 1-alpha 2	Ef1alpha48D;Ef1alpha100E	;;	3	9	9	9	25.3	25.3	25.3	50.306	463	463;462;462	0	75.647	575460000	571260000	28	28	76	261;369;399;459;468;536;537;625;708	True;True;True;True;True;True;True;True;True	270;382;412;413;478;487;557;558;648;733	301;444;487;488;600;612;694;695;696;809;903;904	483;484;485;707;708;771;772;773;774;775;776;1100;1101;1121;1122;1272;1273;1274;1275;1276;1277;1499;1643;1644;1645;1646;1647;1648	483;707;775;1100;1121;1273;1277;1499;1643	14	155
P13060	P13060	P13060	6	6	6	Elongation factor 2	EF2		1	6	6	6	6.3	6.3	6.3	94.458	844	844	0	39.441	25785000	25785000	8	8	77	128;199;531;648;678;697	True;True;True;True;True;True	133;207;551;671;702;721	146;228;687;833;869;870;891	235;375;1258;1259;1535;1590;1591;1624	235;375;1259;1535;1591;1624
P17704	P17704	P17704	3	3	3	40S ribosomal protein S17	RpS17		1	3	3	3	29.8	29.8	29.8	15.285	131	131	0	18.564	13658000	13658000	3	3	78	215;250;253	True;True;True	223;259;262	247;288;291	403;466;469	403;466;469
P25171	P25171	P25171	2	2	2	Regulator of chromosome condensation	Rcc1		1	2	2	2	4.6	4.6	4.6	58.85	547	547	0	11.937	5061700	5061700	2	2	79	498;626	True;True	517;649	645;810	1174;1500	1174;1500
Q95TP9	Q95TP9;P29327	Q95TP9;P29327	2;2	2;2	2;2	40S ribosomal protein S6	RpS6	;	2	2	2	2	9.7	9.7	9.7	24.696	217	217;248	0	12.436	5883300	5883300	3	3	80	84;352	True;True	85;365	95;424	150;673;674	150;674
Q53YH3	Q53YH3;P29413	Q53YH3;P29413	1;1	1;1	1;1	Calreticulin	Crc	;	2	1	1	1	3.2	3.2	3.2	46.808	406	406;406	0	6.4723	1438000	1438000	1	1	81	234	True	243	268	430	430
P29843	P29843	P29843	3	1	1	Heat shock 70 kDa protein cognate 1	Hsc70-1		1	3	1	1	5	2	2	70.686	641	641	0	6.7721	54393000	54393000	1	1	82	377;592;621	False;True;False	390;614;644	454;763;805	723;1387;1494;1495	723;1387;1494
P35381	P35381	P35381	10	10	10	ATP synthase subunit alpha, mitochondrial	blw		1	10	10	10	20.7	20.7	20.7	59.421	552	552	0	69.841	58280000	58280000	13	13	83	56;82;115;231;285;547;557;584;643;665	True;True;True;True;True;True;True;True;True;True	56;83;119;240;296;568;578;605;666;689	60;91;131;265;337;709;721;751;828;852	92;142;209;427;545;1298;1299;1325;1370;1371;1526;1527;1564;1565	92;142;209;427;545;1299;1325;1371;1526;1565
P38979	P38979	P38979	5	5	5	40S ribosomal protein SA	sta		1	5	5	5	23.3	23.3	23.3	30.228	270	270	0	37.804	45427000	45427000	7	7	84	8;182;501;689;705	True;True;True;True;True	8;190;520;713;730	9;209;210;648;883;900	12;345;346;347;1179;1614;1638	12;346;1179;1614;1638
P41094	P41094	P41094	3	3	3	40S ribosomal protein S18	RpS18		1	3	3	3	19.1	19.1	19.1	17.611	152	152	0	21.812	25285000	25285000	5	5	85	286;651;707	True;True;True	297;674;732	338;836;902	546;1539;1540;1641;1642	546;1539;1642
X2JFR6	X2JFR6;P41374	X2JFR6;P41374	3;3	3;3	3;3	Eukaryotic translation initiation factor 2 subunit 1	eIF-2alpha	;	2	3	3	3	8.8	8.8	8.8	38.645	341	341;341	0	18.402	4791300	4791300	5	5	86	26;213;555	True;True;True	26;221;576	29;30;245;719	49;50;400;401;1323	49;400;1323
X2JCS6	X2JCS6;P46223	X2JCS6;P46223	1;1	1;1	1;1	60S ribosomal protein L7a	RpL7A	;	2	1	1	1	4.1	4.1	4.1	30.731	271	271;271	0	6.1259	3008600	3008600	1	1	87	410	True	425	528	987	987
P48159	P48159	P48159	2	2	2	60S ribosomal protein L23	RpL23		1	2	2	2	13.6	13.6	13.6	14.936	140	140	0	15.062	5224900	5224900	4	4	88	116;429	True;True	120;445	132;555;556	210;211;1030;1031	210;1030
P48591	P48591	P48591	2	2	2	Ribonucleoside-diphosphate reductase large subunit	RnrL		1	2	2	2	3.2	3.2	3.2	91.977	812	812	0	11.093	2984600	2984600	2	2	89	272;480	True;True	281;500	314;627	506;1146	506;1146
P48604	P48604	P48604	5	5	5	GrpE protein homolog, mitochondrial	Roe1		1	5	5	5	22.5	22.5	22.5	23.926	213	213	0	31.867	26409000	26409000	5	5	90	50;51;237;260;510	True;True;True;True;True	50;51;246;269;529	54;55;271;272;300;659	84;85;435;436;482;1198	84;85;435;482;1198
P50887	P50887	P50887	1	1	1	60S ribosomal protein L22	RpL22		1	1	1	1	4	4	4	30.61	299	299	0.0070922	6.0453	1123300	1123300	1	1	91	4	True	4	4	5	5
P52295	P52295	P52295	1	1	1	Importin subunit alpha	Pen		1	1	1	1	2.3	2.3	2.3	57.821	522	522	0	7.7893	1864600	1864600	1	1	92	293	True	304	345	555	555
P54385	P54385;A0A0C4DHE7;Q8IMY1	P54385;A0A0C4DHE7;Q8IMY1	6;5;5	6;5;5	6;5;5	Glutamate dehydrogenase, mitochondrial;Glutamate dehydrogenase	Gdh	;;	3	6	6	6	10.1	10.1	10.1	62.536	562	562;391;404	0	34.194	17669000	17669000	5	5	93	32;64;292;473;544;701	True;True;True;True;True;True	32;65;303;493;565;726	36;72;344;619;706;896	57;112;554;1137;1295;1634	57;112;554;1137;1295;1634
P54397	P54397	P54397	3	3	3	39 kDa FK506-binding nuclear protein	FK506-bp1		1	3	3	3	9	9	9	39.343	357	357	0	21.359	19327000	19327000	2	2	94	496;635;661	True;True;True	515;658;684	643;820;847	1172;1515;1556	1172;1515;1556
P55828	P55828	P55828	3	3	3	40S ribosomal protein S20	RpS20		1	3	3	3	23.3	23.3	23.3	13.488	120	120	0	31.454	145290000	145290000	12	12	95	83;273;274	True;True;True	84;282;283	92;93;94;315;316;317	143;144;145;146;147;148;149;507;508;509;510;511	144;510;511
P55830	P55830	P55830	2	2	2	40S ribosomal protein S3a	RpS3A		1	2	2	2	9	9	9	30.34	268	268	0	11.927	10683000	10683000	3	3	96	349;404	True;True	362;418	421;494	669;670;783	669;783
P92177	P92177	P92177	4	4	3	14-3-3 protein epsilon	14-3-3epsilon		1	4	4	3	12.2	12.2	9.2	29.798	262	262	0	25.854	20634000	20634000	4	4	97	241;423;692;693	True;True;True;True	250;439;716;717	277;548;886;887	445;1021;1617;1618	445;1021;1617;1618
X2J950	X2J950;Q03334	X2J950;Q03334	1;1	1;1	1;1	40S ribosomal protein S13	RpS13	;	2	1	1	1	6.6	6.6	6.6	17.178	151	151;151	0.0071429	6.0484	2702500	2702500	1	1	98	208	True	216	238	389	389
X2JKU5	X2JKU5;Q24186;A0A0B4K683;Q9VFE4	X2JKU5;Q24186;A0A0B4K683;Q9VFE4	3;3;2;2	3;3;2;2	3;3;2;2	40S ribosomal protein S5a;40S ribosomal protein S5b	RpS5a;RpS5b	;;;	4	3	3	3	9.6	9.6	9.6	25.434	228	228;228;180;230	0	18.544	21048000	21048000	5	5	99	41;311;650	True;True;True	41;323;673	45;368;835	68;69;589;1537;1538	68;589;1537
Q24492	Q24492	Q24492	2	2	2	Replication protein A 70 kDa DNA-binding subunit	RpA-70		1	2	2	2	3.3	3.3	3.3	66.624	603	603	0	11.132	6546800	6546800	2	2	100	288;666	True;True	299;690	340;853	550;1566	550;1566
Q24560	Q24560;A1ZBL0;P61857;A0A0B4LGH1;P08841;Q9VAX7;Q8MST5;CON__ENSEMBL:ENSBTAP00000025008	Q24560;A1ZBL0;P61857;A0A0B4LGH1;P08841	17;16;11;10;10;7;7;5	17;16;11;10;10;7;7;5	17;16;11;10;10;7;7;5	Tubulin beta-1 chain;Tubulin beta-2 chain;Tubulin beta-3 chain	betaTub56D;betaTub85D;betaTub60D	;;;;	8	17	17	17	39.6	39.6	39.6	50.147	447	447;456;446;453;454;457;457;536	0	160.02	564390000	532580000	67	67	101	35;60;136;155;177;178;287;289;296;298;322;337;348;430;435;550;699	True;True;True;True;True;True;True;True;True;True;True;True;True;True;True;True;True	35;60;61;141;161;162;185;186;298;300;307;309;334;349;360;361;446;447;454;571;723	39;66;67;154;155;177;178;204;205;339;341;348;349;352;382;383;403;418;419;420;557;558;568;712;713;714;893	60;61;62;101;102;103;104;105;249;250;251;285;286;287;288;331;332;333;334;335;336;337;547;548;549;551;559;560;561;567;568;605;606;607;636;637;638;662;663;664;665;666;667;668;1032;1033;1034;1049;1050;1303;1304;1305;1306;1307;1308;1309;1310;1311;1312;1313;1314;1315;1316;1317;1318;1629;1630	61;104;249;287;331;337;547;551;560;568;605;637;664;1032;1049;1305;1630	15;16;17;18	73;267;299;330
Q3YMU0	Q3YMU0	Q3YMU0	3	3	3	Protein disulfide-isomerase	ERp60		1	3	3	3	7	7	7	55.37	489	489	0	21.105	14439000	14439000	3	3	102	355;492;704	True;True;True	368;511;729	427;638;899	678;1164;1637	678;1164;1637
Q76NQ0	Q76NQ0	Q76NQ0	3	3	3	Dolichyl-diphosphooligosaccharide--protein glycosyltransferase subunit 1			1	3	3	3	7.4	7.4	7.4	51.709	458	458	0	18.627	11001000	11001000	2	2	103	207;278;608	True;True;True	215;287;631	237;322;785	388;521;1415	388;521;1415
Q7JXZ2	Q7JXZ2	Q7JXZ2	3	3	3		Eip55E		1	3	3	3	9.7	9.7	9.7	42.988	393	393	0	17.056	6804400	6804400	5	5	104	392;566;609	True;True;True	405;587;632	479;730;786	756;757;1334;1335;1416	757;1334;1416
Q7KMQ0	Q7KMQ0;M9PC18;Q9VQN8	Q7KMQ0;M9PC18;Q9VQN8	2;1;1	2;1;1	2;1;1	Fidgetin-like protein 1	Rpt1;CG3326-RA;CG3326	;;	3	2	2	2	5.8	5.8	5.8	48.541	433	433;523;523	0	13.958	5069400	5069400	2	2	106	228;451	True;True	237;470	262;589	423;1085	423;1085
Q7KW39	Q7KW39	Q7KW39	5	5	5	Probable methylmalonate-semialdehyde dehydrogenase [acylating], mitochondrial	CG17896		1	5	5	5	12.5	12.5	12.5	55.972	520	520	0	34.18	26278000	26278000	5	5	108	53;62;562;604;647	True;True;True;True;True	53;63;583;627;670	57;69;726;781;832	89;107;108;1330;1410;1534	89;108;1330;1410;1534
Q8IMI7	Q8IMI7;Q9VA91	Q8IMI7;Q9VA91	2;2	2;2	2;2	40S ribosomal protein S7	RpS7	;	2	2	2	2	11.9	11.9	11.9	22.17	194	194;194	0	11.934	13491000	13491000	3	3	109	277;620	True;True	286;643	321;804	519;520;1493	520;1493
Q8IPB1	Q8IPB1;Q9V3I1	Q8IPB1;Q9V3I1	1;1	1;1	1;1		dUTPase	;	2	1	1	1	8	8	8	18.485	174	174;188	0	7.5197	3181200	3181200	1	1	110	552	True	573	716	1320	1320
X2JDP6	X2JDP6;Q8T079;M9MRG2	X2JDP6;Q8T079;M9MRG2	7;7;6	7;7;6	7;7;6	Putative oxidoreductase GLYR1 homolog	CG4747	;;	3	7	7	7	13.5	13.5	13.5	65.251	602	602;602;603	0	44.241	27546000	27546000	7	7	111	88;193;232;347;436;688;696	True;True;True;True;True;True;True	89;201;241;359;455;712;720	99;221;266;417;569;882;890	155;363;428;661;1051;1613;1623	155;363;428;661;1051;1613;1623
X2JF59	X2JF59;Q9V3P0	X2JF59;Q9V3P0	2;2	2;2	2;2	Peroxiredoxin 1	Jafrac1	;	2	2	2	2	10.8	10.8	10.8	21.738	194	194;194	0	14.228	8743500	8743500	2	2	112	389;454	True;True	402;473	473;594	748;1092	748;1092
Q9V3Z4	Q9V3Z4	Q9V3Z4	2	2	2		Rpn5		1	2	2	2	3.8	3.8	3.8	57.747	502	502	0	11.459	3510900	3510900	2	2	113	104;247	True;True	106;256	118;284	181;457	181;457
Q9V9A7	Q9V9A7	Q9V9A7	23	23	23	Probable methylcrotonoyl-CoA carboxylase beta chain, mitochondrial	l(2)04524		1	23	23	23	40.8	40.8	40.8	62.648	578	578	0	249.16	1364800000	1322800000	72	72	114	2;5;17;43;123;124;145;149;175;188;205;324;327;368;393;396;405;411;442;448;450;585;617	True;True;True;True;True;True;True;True;True;True;True;True;True;True;True;True;True;True;True;True;True;True;True	2;5;17;43;127;128;150;151;155;182;183;196;213;336;339;381;406;409;419;420;426;461;467;469;606;640	2;5;6;20;47;139;140;165;166;170;201;202;216;235;385;389;390;442;443;480;481;484;495;496;529;577;578;579;586;588;752;753;754;801	2;3;6;7;8;9;33;71;72;73;222;223;224;266;267;268;269;270;275;276;325;326;327;328;329;356;357;384;385;386;610;616;617;618;619;704;705;706;758;759;760;761;762;766;767;784;785;786;787;988;989;990;1061;1062;1063;1064;1065;1076;1077;1078;1079;1080;1083;1084;1372;1373;1374;1375;1376;1377;1486;1487	2;8;33;72;223;224;268;275;327;357;385;610;617;705;760;766;787;989;1063;1079;1084;1374;1487	19;20;21	48;440;479
Q9VBU9	Q9VBU9	Q9VBU9	2	2	2	40S ribosomal protein S27	RpS27		1	2	2	2	22.6	22.6	22.6	9.364	84	84	0	12.322	12328000	12328000	2	2	117	89;381	True;True	90;394	100;464	156;738	156;738
Q9VEX6	Q9VEX6	Q9VEX6	5	5	5		bor		1	5	5	5	7.6	7.6	7.6	68.36	604	604	0	28.997	10246000	10246000	5	5	119	46;165;263;398;593	True;True;True;True;True	46;172;272;411;615	50;189;303;486;764	78;302;487;770;1388	78;302;487;770;1388
Q9VFV9	Q9VFV9	Q9VFV9	1	1	1		Droj2		1	1	1	1	3.7	3.7	3.7	45.23	403	403	0	7.8927	7218800	7218800	1	1	120	22	True	22	25	40	40
Q9VHL2	Q9VHL2	Q9VHL2	2	2	2		Tcp-1eta		1	2	2	2	4	4	4	59.386	544	544	0	12.155	3748900	3748900	2	2	122	270;358	True;True	279;371	311;430;431	497;682;683	497;683
Q9VJD1	Q9VJD1	Q9VJD1	2	2	2		GCS2beta		1	2	2	2	3.6	3.6	3.6	61.539	548	548	0	11.819	4037900	4037900	2	2	123	161;302	True;True	168;313	184;356	295;573	295;573
X2JE06	X2JE06;Q9VJY6	X2JE06;Q9VJY6	1;1	1;1	1;1	60S ribosomal protein L24	RpL24	;	2	1	1	1	8.4	8.4	8.4	17.52	155	155;155	0	7.3025	3094600	3094600	1	1	124	23	True	23	26	41	41
Q9VLC5	Q9VLC5	Q9VLC5	5	5	5		Aldh		1	5	5	5	9.8	9.8	9.8	57.018	520	520	0	29.135	25324000	25324000	6	6	125	122;309;351;611;662	True;True;True;True;True	126;321;364;634;685	138;366;423;788;848	220;221;586;672;1418;1557	220;586;672;1418;1557
Q9VPN5	Q9VPN5	Q9VPN5	2	2	2		Hop		1	2	2	2	3.9	3.9	3.9	55.697	490	490	0	11.564	5998100	5998100	2	2	126	15;586	True;True	15;607	18;755	30;1378	30;1378
Q9VV75	Q9VV75	Q9VV75	6	6	6		UQCR-C2		1	6	6	6	16.8	16.8	16.8	45.415	440	440	0	39.546	24144000	24144000	8	8	127	3;63;441;482;605;659	True;True;True;True;True;True	3;64;460;502;628;682	3;70;71;576;629;782;845	4;109;110;111;1060;1149;1411;1412;1554	4;110;1060;1149;1411;1554
Q9VVU2	Q9VVU2	Q9VVU2	2	2	2		RpL26		1	2	2	2	11.4	11.4	11.4	17.281	149	149	0	11.28	3922800	3922800	2	2	128	79;235	True;True	80;244	88;269	138;431	138;431
Q9VWH4	Q9VWH4	Q9VWH4	2	2	2	Probable isocitrate dehydrogenase [NAD] subunit alpha, mitochondrial	l(1)G0156		1	2	2	2	6.6	6.6	6.6	40.844	377	377	0	11.872	8636600	8636600	2	2	129	171;610	True;True	178;633	196;787	317;1417	317;1417
Q9VXQ5	Q9VXQ5	Q9VXQ5	6	6	6		Tcp-1zeta		1	6	6	6	12.4	12.4	12.4	58.246	533	533	0	35.727	22203000	22203000	5	5	130	27;37;206;485;556;564	True;True;True;True;True;True	27;37;214;504;577;585	31;41;236;631;720;728	51;64;387;1154;1324;1332	51;64;387;1154;1324;1332
Q9VXW7	Q9VXW7	Q9VXW7	11	11	11		gce		1	11	11	11	13.5	13.5	13.5	105.84	959	959	0	74.389	86776000	86776000	17	17	131	164;262;427;428;463;486;493;505;521;580;683	True;True;True;True;True;True;True;True;True;True;True	171;271;443;444;482;505;512;524;541;601;707	187;188;302;553;554;605;632;639;640;652;674;747;877	299;300;301;486;1027;1028;1029;1110;1155;1165;1166;1167;1187;1230;1231;1363;1364;1605	300;486;1027;1029;1110;1155;1167;1187;1231;1364;1605
Q9VYW2	Q9VYW2	Q9VYW2	14	14	14		Met		1	14	14	14	23.5	23.5	23.5	78.692	716	716	0	126.03	305090000	305090000	34	34	132	13;86;240;266;267;306;365;397;426;460;461;462;541;576	True;True;True;True;True;True;True;True;True;True;True;True;True;True	13;87;249;275;276;318;378;410;442;479;480;481;562;597	14;15;97;275;276;306;307;308;361;439;485;552;601;602;603;604;702;743	21;22;23;24;152;440;441;442;443;444;491;492;493;494;581;698;768;769;1025;1026;1102;1103;1104;1105;1106;1107;1108;1109;1286;1287;1288;1356;1357;1358	22;152;444;492;493;581;698;769;1026;1102;1104;1109;1287;1357
Q9W0A8	Q9W0A8	Q9W0A8	1	1	1		RpL23A		1	1	1	1	3.6	3.6	3.6	29.463	277	277	0	6.9503	3582000	3582000	1	1	133	112	True	115	127	200	200
Q9W1B9	Q9W1B9	Q9W1B9	2	2	2		RpL12		1	2	2	2	15.2	15.2	15.2	17.673	165	165	0	13.626	10574000	10574000	3	3	134	156;268	True;True	163;277	179;309	289;290;495	289;495
Q9W1V3	Q9W1V3	Q9W1V3	2	2	2	rRNA 2-O-methyltransferase fibrillarin	Fib		1	2	2	2	7.3	7.3	7.3	34.636	344	344	0	11.179	5024300	5024300	2	2	135	353;575	True;True	366;596	425;742	675;1355	675;1355
Q9W3C0	Q9W3C0	Q9W3C0	1	1	1	Probable U3 small nucleolar RNA-associated protein 11	CG1789		1	1	1	1	4.6	4.6	4.6	28.538	237	237	0	6.1357	24290000	24290000	2	2	137	295	True	306	347	557;558	558
R9Q794	R9Q794;Q9W5R8	R9Q794;Q9W5R8	2;2	2;2	2;2	60S ribosomal protein L5	RpL5	;	2	2	2	2	7	7	7	34.036	299	299;299	0	12.085	10097000	10097000	3	3	138	67;512	True;True	68;531	75;661;662	115;1201;1202	115;1202
Q9XYU0	Q9XYU0	Q9XYU0	2	2	2	DNA replication licensing factor Mcm7	Mcm7		1	2	2	2	3.9	3.9	3.9	81.283	720	720	0	11.629	4771700	4771700	2	2	139	376;657	True;True	389;680	453;843	722;1552	722;1552
X2JB48	X2JB48;Q26365;O62526	X2JB48;Q26365	13;12;3	13;12;3	13;12;3	ADP,ATP carrier protein	sesB	;	3	13	13	13	40.1	40.1	40.1	32.909	299	299;312;307	0	95.034	427420000	422660000	31	31	141	6;80;81;125;147;186;211;216;437;469;483;549;685	True;True;True;True;True;True;True;True;True;True;True;True;True	6;81;82;129;153;194;219;224;225;456;488;503;570;709	7;89;90;141;168;214;242;243;248;249;570;571;613;630;711;879	10;139;140;141;225;226;272;273;353;354;394;395;396;397;404;405;406;1052;1053;1054;1123;1124;1125;1150;1151;1152;1153;1301;1302;1608;1609	10;139;140;225;273;353;394;405;1054;1124;1150;1301;1608	25	56
LC-MS analysis of boiling eluted proteins
Leading Protein	Protein IDs	Majority protein IDs	Peptide counts (all)	Peptide counts (razor+unique)	Peptide counts (unique)	Protein names	Gene names	Fasta headers	Number of proteins	Peptides	Razor + unique peptides	Unique peptides	Sequence coverage [%]	Unique + razor sequence coverage [%]	Unique sequence coverage [%]	Mol. weight [kDa]	Sequence length	Sequence lengths	Q-value	Score	Intensity	LFQ intensity	MS/MS count	MS/MS count	id	Peptide IDs	Peptide is razor	Mod. peptide IDs	Evidence IDs	MS/MS IDs	Best MS/MS	Oxidation (M) site IDs	Oxidation (M) site positions
A0A0B4JCY6	A0A0B4JCY6;Q7KSF4;A0A0B4KHN1;A0A0B4KGT8;Q9VEN1	A0A0B4JCY6;Q7KSF4;A0A0B4KHN1;A0A0B4KGT8;Q9VEN1	1;1;1;1;1	1;1;1;1;1	1;1;1;1;1	Filamin-A	cher	;;;;	5	1	1	1	0.6	0.6	0.6	242.79	2240	2240;2399;2404;2429;2210	0	6.4112	3051000	3051000	1	1	0	413	True	442	569	971	971
A0A0B4JD95	A0A0B4JD95;Q59E58;A0A0B4JD57;Q59E59;A0A0B4K7Q4	A0A0B4JD95;Q59E58;A0A0B4JD57;Q59E59;A0A0B4K7Q4	22;22;22;21;21	22;22;22;21;21	2;2;2;1;1		zip	;;;;	5	22	22	2	13.6	13.6	1.4	226.75	1964	1964;1971;1979;2016;2024	0	164.73	162790000	162790000	25	25	1	1;2;23;33;43;54;95;113;290;327;335;387;414;420;430;440;441;445;464;522;597;680	True;True;True;True;True;True;True;True;True;True;True;True;True;True;True;True;True;True;True;True;True;True	1;2;24;34;44;57;99;118;311;349;357;415;443;449;461;471;472;476;496;557;645;735	1;2;29;42;53;66;116;145;393;446;454;532;570;576;593;606;607;611;633;710;837;963	1;2;45;65;80;97;168;212;641;642;747;762;763;887;972;981;1024;1045;1046;1051;1084;1212;1418;1628;1629	1;2;45;65;80;97;168;212;642;747;762;887;972;981;1024;1045;1046;1051;1084;1212;1418;1629
Q9VEZ3	Q9VEZ3;E1JIM4;A0A0B4K664;A0A0B4K700	Q9VEZ3;E1JIM4;A0A0B4K664;A0A0B4K700	2;2;2;2	2;2;2;2	2;2;2;2		msps	;;;	4	2	2	2	1.5	1.5	1.5	225.98	2042	2042;2050;2074;2082	0	12.866	3568900	3568900	1	1	2	831;969	True;True	895;1037	1170;1341	1975;2267	1975;2267
A0A0B4K7G4	A0A0B4K7G4;P13469	A0A0B4K7G4;P13469	2;2	2;2	2;2	DNA-binding protein modulo	mod	;	2	2	2	2	5.7	5.7	5.7	60.309	542	542;542	0	12.333	4730900	4730900	2	2	3	30;855	True;True	31;921	39;1207	62;2039	62;2039
A0A0B4K7J2	A0A0B4K7J2	A0A0B4K7J2	3	3	3		Nup358		1	3	3	3	1.4	1.4	1.4	298.93	2718	2718	0	17.862	7758200	7758200	3	3	4	63;353;448	True;True;True	67;379;479	79;482;614	115;810;1054	115;810;1054
A0A0B4KEX0	A0A0B4KEX0;A1ZAB5	A0A0B4KEX0;A1ZAB5	6;6	6;6	6;6	Protein clueless	clu	;	2	6	6	6	5.5	5.5	5.5	144.74	1289	1289;1448	0	37.833	25906000	25906000	4	4	5	130;174;236;500;703;903	True;True;True;True;True;True	138;187;254;533;760;969	167;233;320;683;994;1264	245;363;508;1169;1679;2152	245;363;508;1169;1679;2152
A0A0B4KF46	A0A0B4KF46;Q8T0L3	A0A0B4KF46;Q8T0L3	3;3	3;3	3;3		Uba1	;	2	3	3	3	3.8	3.8	3.8	111.77	1008	1008;1191	0	18.043	15459000	15459000	2	2	6	16;454;842	True;True;True	17;486;907	20;622;1189	32;1068;2011	32;1068;2011
A0A0B4KFZ9	A0A0B4KFZ9;P84040	A0A0B4KFZ9;P84040	2;2	2;2	2;2	Histone H4	His4r;His4	;	2	2	2	2	19.4	19.4	19.4	11.381	103	103;103	0	11.853	13349000	13349000	2	2	7	120;872	True;True	126;938	154;1226	225;2085	225;2085
A0A0B4KHL2	A0A0B4KHL2;Q8I0G5	A0A0B4KHL2;Q8I0G5	2;2	2;2	2;2	Coatomer subunit gamma	gammaCOP;gammaCop	;	2	2	2	2	2.6	2.6	2.6	99.332	897	897;883	0	11.774	5131100	5131100	2	2	8	447;866	True;True	478;932	613;1220	1053;2076	1053;2076
A0A0B4LEV2	A0A0B4LEV2;Q26454	A0A0B4LEV2;Q26454	3;3	3;3	3;3	DNA replication licensing factor MCM4	dpa	;	2	3	3	3	3.6	3.6	3.6	96.609	866	866;866	0	19.433	18460000	18460000	4	4	9	154;776;783	True;True;True	166;837;844	202;203;1100;1108	315;316;1866;1875	315;1866;1875
A8DY82	A8DY82;E2QCN4;A8DY80;A8DY81;A0A0B4LEZ3	A8DY82;E2QCN4;A8DY80;A8DY81;A0A0B4LEZ3	2;2;2;2;2	2;2;2;2;2	2;2;2;2;2		Not1	;;;;	5	2	2	2	1.9	1.9	1.9	249.76	2220	2220;2492;2503;2505;2511	0	10.825	4112600	4112600	1	1	10	60;898	True;True	64;964	75;1258	107;2142	107;2142
A0A0B4LGC0	A0A0B4LGC0;A0A0B4LF88;Q9V6K1	A0A0B4LGC0;A0A0B4LF88;Q9V6K1	4;4;4	4;4;4	4;4;4	Tripeptidyl-peptidase 2	TppII	;;	3	4	4	4	3.5	3.5	3.5	148.91	1354	1354;1375;1441	0	26.236	15893000	15893000	4	4	11	103;567;862;906	True;True;True;True	107;611;928;972	128;783;1216;1267	185;1321;2070;2156	185;1321;2070;2156
A0A0B4LFD2	A0A0B4LFD2;P29845	A0A0B4LFD2;P29845	4;4	4;4	4;4	Heat shock 70 kDa protein cognate 5	Hsc70-5	;	2	4	4	4	6.9	6.9	6.9	74.065	686	686;686	0	31.13	46405000	46405000	5	5	12	91;571;886;923	True;True;True;True	95;615;952;989	111;793;1243;1287	158;1342;1343;2114;2184	158;1343;2114;2184
A0A0B4LFL2	A0A0B4LFL2;A1ZAX1	A0A0B4LFL2;A1ZAX1	8;8	8;8	8;8	Eukaryotic translation initiation factor 3 subunit C	eIF3-S8	;	2	8	8	8	9.5	9.5	9.5	105.65	910	910;910	0	62.397	59942000	59942000	9	9	13	89;107;137;178;227;638;778;931	True;True;True;True;True;True;True;True	93;111;147;191;245;689;839;998	109;133;178;238;308;898;1102;1296	156;193;261;371;372;485;1516;1868;2198	156;193;261;371;485;1516;1868;2198
A0A0B4LFW6	A0A0B4LFW6;A1Z7S0	A0A0B4LFW6;A1Z7S0	5;5	5;5	5;5		Rme-8	;	2	5	5	5	2.4	2.4	2.4	272.47	2407	2407;2408	0	30.862	22644000	22644000	4	4	14	104;299;469;732;880	True;True;True;True;True	108;321;501;792;946	129;405;638;1042;1234	186;660;1089;1773;2100	186;660;1089;1773;2100
A0A0B4LFZ4	A0A0B4LFZ4;Q7KN62	A0A0B4LFZ4;Q7KN62	6;6	6;6	6;6	Transitional endoplasmic reticulum ATPase TER94	TER94	;	2	6	6	6	7.6	7.6	7.6	91.923	825	825;801	0	35.422	19767000	19767000	6	6	15	27;157;186;446;546;932	True;True;True;True;True;True	28;170;202;477;583;999	34;211;253;612;747;1297	50;332;397;1052;1266;2199	50;332;397;1052;1266;2199	0;1	68;241
A0A0B4LG52	A0A0B4LG52;Q9W237	A0A0B4LG52;Q9W237	1;1	1;1	1;1	40S ribosomal protein S16	RpS16	;	2	1	1	1	9.5	9.5	9.5	16.774	148	148;148	0.007874	5.9208	4051100	4051100	1	1	16	924	True	990	1288	2185	2185
A0A0B4LGB7	A0A0B4LGB7;P22700	A0A0B4LGB7;P22700	6;6	6;6	6;6	Calcium-transporting ATPase;Calcium-transporting ATPase sarcoplasmic/endoplasmic reticulum type	Ca-P60A	;	2	6	6	6	7.3	7.3	7.3	109.35	999	999;1020	0	41.775	34847000	34847000	5	5	17	354;372;398;453;580;836	True;True;True;True;True;True	380;400;426;485;625;900	483;514;548;621;806;1178	811;866;924;1067;1362;1988	811;866;924;1067;1362;1988
Q9VNC3	Q9VNC3;A0A0B4LGM5;A0A0B4KF92;A0A0B4LGS6	Q9VNC3;A0A0B4LGM5;A0A0B4KF92;A0A0B4LGS6	5;5;4;4	5;5;4;4	5;5;4;4		Hcs	;;;	4	5	5	5	5.4	5.4	5.4	115.92	1041	1041;1047;993;999	0	33.978	23236000	23236000	5	5	18	6;444;594;927;928	True;True;True;True;True	6;475;642;993;994	6;610;834;1291;1292	6;1050;1415;2188;2189;2190	6;1050;1415;2188;2189
A0A0S0WIA2	A0A0S0WIA2;Q9I7N0;Q7KTD0;Q7KTC9;Q7KTC8;Q7KTC7;Q7KTC6;Q7KTC5;Q7KTC4;Q7KTC3;Q7KTC2;Q7KTC1;Q7KTB9;Q7KTB8;Q7KTB7;Q9VK56;Q7KTC0	A0A0S0WIA2;Q9I7N0;Q7KTD0;Q7KTC9;Q7KTC8;Q7KTC7;Q7KTC6;Q7KTC5;Q7KTC4;Q7KTC3;Q7KTC2;Q7KTC1;Q7KTB9;Q7KTB8;Q7KTB7;Q9VK56;Q7KTC0	3;3;3;3;3;3;3;3;3;3;3;3;3;3;3;3;3	3;3;3;3;3;3;3;3;3;3;3;3;3;3;3;3;3	3;3;3;3;3;3;3;3;3;3;3;3;3;3;3;3;3		MRP	;;;;;;;;;;;;;;;;	17	3	3	3	2	2	2	167.63	1492	1492;1548;1548;1548;1548;1548;1548;1548;1548;1548;1548;1548;1548;1548;1548;1549;1549	0	16.95	13495000	13495000	3	3	19	119;307;864	True;True;True	125;329;930	153;414;1218	224;673;2072	224;673;2072
A0A0S0WNN6	A0A0S0WNN6;Q9TVM2	A0A0S0WNN6;Q9TVM2	1;1	1;1	1;1	Exportin-1	emb	;	2	1	1	1	1.1	1.1	1.1	122.8	1063	1063;1063	0	6.0792	3202600	3202600	1	1	20	863	True	929	1217	2071	2071
A1YK02	A1YK02	A1YK02	1	1	1		Nup75		1	1	1	1	1.6	1.6	1.6	76.871	668	668	0.0080645	6.0124	20688000	20688000	1	1	21	565	True	608	779	1313	1313	2;3	349;354
A1Z784	A1Z784;Q7JV23;A8DY67	A1Z784;Q7JV23;A8DY67	121;116;113	121;116;113	121;116;113		ACC	;;	3	121	121	121	47.1	47.1	47.1	278.59	2482	2482;2323;2348	0	323.31	43374000000	40075000000	592	592	22	8;28;29;50;51;52;61;65;67;76;77;93;97;98;101;102;109;118;122;135;138;142;152;155;169;170;184;209;222;243;249;250;254;257;265;274;275;276;309;314;315;316;319;325;332;333;338;342;349;360;394;396;397;401;402;405;407;412;417;424;429;437;456;457;479;494;495;504;506;515;516;524;550;552;554;556;559;560;562;564;612;613;614;620;624;639;645;646;648;649;654;657;658;660;664;666;668;677;692;693;744;769;785;79…	True;True;True;True;True;True;True;True;True;True;True;True;True;True;True;True;True;True;True;True;True;True;True;True;True;True;True;True;True;True;True;True;True;True;True;True;True;True;True;True;True;True;True;True;True;True;True;True;True;True;True;True;True;True;True;True;True;True;True;True;True;True;True;True;True;True;True;True;True;True;True;True;True;True;True;True;True;True;True;True…	8;29;30;52;53;54;55;65;69;71;80;81;97;101;102;105;106;113;124;128;145;148;152;164;167;168;182;183;198;199;226;240;261;262;268;269;273;274;275;278;286;295;296;297;331;336;337;338;341;347;354;355;360;364;365;373;386;422;424;425;429;430;434;436;441;446;453;454;460;468;488;489;511;512;527;528;537;539;549;550;551;559;588;589;591;594;595;597;598;601;602;604;605;607;661;662;663;669;673;690;697;698;699;7…	8;35;36;37;38;61;62;63;64;76;77;81;84;93;94;95;114;118;119;120;123;124;125;126;127;135;152;156;157;174;175;179;183;200;204;205;206;207;208;209;226;227;228;229;247;248;249;250;280;281;282;300;301;302;327;328;335;336;341;342;343;344;345;348;358;369;370;371;372;373;416;417;418;424;425;426;427;428;429;430;431;434;435;442;443;451;452;457;461;462;463;464;474;489;490;542;544;545;546;547;551;552;553;554;…	9;10;51;52;53;54;55;56;57;58;59;60;61;92;93;94;95;108;109;110;111;118;122;123;134;135;136;137;138;163;164;165;166;170;171;172;173;176;177;178;179;180;181;182;183;184;195;222;223;227;228;229;230;253;254;255;256;257;262;263;264;265;270;304;305;306;307;308;309;310;311;312;317;318;319;320;321;322;323;324;325;326;327;328;329;330;349;350;351;352;353;354;355;356;382;383;384;385;386;387;388;389;390;432;4…	9;51;60;93;94;95;109;118;123;134;138;163;172;173;176;184;195;223;228;255;263;270;304;330;349;354;389;437;471;525;552;553;564;572;586;603;606;616;675;700;709;718;728;741;754;757;766;773;795;821;912;919;923;928;936;949;954;966;977;989;1020;1041;1070;1074;1118;1154;1161;1176;1180;1198;1204;1214;1272;1277;1286;1295;1301;1302;1304;1312;1438;1441;1443;1465;1477;1519;1540;1551;1559;1560;1569;1574;1580;1…	4;5;6;7;8;9;10;11;12;13;14;15;16;17;18;19;20;21;22;23;24;25;26;27;28;29	160;286;298;379;486;541;551;770;834;902;1058;1119;1157;1332;1516;1531;1614;1779;1790;2057;2128;2184;2187;2236;2329;2470
Q7JYK1	Q7JYK1;Q9W418;A4V1F9;P18101;P15357;P0CG69;R9PY16	Q7JYK1;Q9W418;A4V1F9;P18101;P15357;P0CG69;R9PY16	3;3;3;3;3;3;2	3;3;3;3;3;3;2	3;3;3;3;3;3;2	Ubiquitin-60S ribosomal protein L40;Ubiquitin;60S ribosomal protein L40;Ubiquitin-40S ribosomal protein S27a;Ubiquitin;40S ribosomal protein S27a;Polyubiquitin;Ubiquitin	RpL40;Ubi-p5E;Ubi-p63E;RpS27A	;;;;;;	7	3	3	3	29.7	29.7	29.7	14.729	128	128;534;763;128;156;763;301	0	62.749	98341000	98341000	14	14	26	197;388;788	True;True;True	213;416;849	266;533;534;1113;1114	413;414;888;889;890;891;892;893;894;895;896;1880;1881;1882	413;893;1881
A4V391	A4V391;P12613	A4V391;P12613	6;6	6;6	6;6	T-complex protein 1 subunit alpha	T-cp1	;	2	6	6	6	12	12	12	59.556	557	557;557	0	47.103	45251000	45251000	8	8	27	0;192;357;489;745;970	True;True;True;True;True;True	0;208;383;522;805;1038	0;260;486;670;1058;1342	0;405;406;816;1147;1802;1803;2268	0;405;816;1147;1803;2268
A4V4A1	A4V4A1;Q960Z0	A4V4A1;Q960Z0	2;2	2;2	2;2	Kinesin-like protein;Kinesin-like protein Klp10A	Klp10A	;	2	2	2	2	2.9	2.9	2.9	88.671	805	805;805	0	11.749	5332000	5332000	1	1	28	159;596	True;True	172;644	213;836	334;1417	334;1417
O61380	O61380;A8DZ29	O61380;A8DZ29	11;11	11;11	11;11		eIF4G	;	2	11	11	11	7.9	7.9	7.9	183.94	1666	1666;1919	0	68.623	64829000	64829000	14	14	29	26;64;234;283;501;531;673;712;727;729;922	True;True;True;True;True;True;True;True;True;True;True	27;68;252;304;534;566;728;769;786;788;988	33;80;318;383;684;721;954;955;1008;1009;1033;1037;1286	49;116;117;506;630;1170;1227;1616;1617;1707;1708;1752;1760;2183	49;117;506;630;1170;1227;1617;1708;1752;1760;2183	30	669
A8JV18	A8JV18;Q9VXE6	A8JV18;Q9VXE6	4;4	4;4	4;4	Nuclear pore complex protein Nup153	Nup153	;	2	4	4	4	2.4	2.4	2.4	201.23	1929	1929;1883	0	21.765	8755300	8755300	3	3	30	549;579;688;909	True;True;True;True	587;624;744;975	751;805;974;1270	1271;1361;1646;2159	1271;1361;1646;2159
C7LA75	C7LA75;P11147;P29843;Q8I0E9	C7LA75;P11147	25;25;2;1	25;25;2;1	21;21;1;1	Heat shock 70 kDa protein cognate 4	Hsc70-4-RA;Hsc70-4	;	4	25	25	21	39.2	39.2	30.7	71.131	651	651;651;641;555	0	277.51	1106200000	1077200000	67	67	32	66;72;171;219;220;323;343;344;366;399;418;433;497;538;553;601;602;625;743;756;777;828;845;865;949	True;True;True;True;True;True;True;True;True;True;True;True;True;True;True;True;True;True;True;True;True;True;True;True;True	70;76;184;237;238;345;366;367;392;427;447;464;530;573;592;593;649;650;651;674;803;817;838;892;910;931;1017	82;83;89;230;297;298;439;440;465;466;467;468;500;501;549;574;598;680;728;729;756;757;758;841;842;843;878;1054;1055;1072;1073;1101;1167;1192;1193;1219;1316;1317;1318	119;120;121;128;357;358;463;464;465;466;467;468;733;734;735;781;782;783;784;785;839;840;841;842;843;925;926;978;979;1031;1032;1165;1237;1238;1239;1240;1278;1279;1280;1281;1282;1283;1423;1424;1425;1426;1484;1791;1792;1793;1794;1822;1823;1824;1825;1867;1972;2015;2016;2017;2018;2073;2074;2075;2227;2228;2229;2230;2231	120;128;358;464;465;733;782;785;843;925;978;1032;1165;1240;1280;1423;1424;1484;1794;1825;1867;1972;2016;2074;2230	31;32;33	61;122;127
C9QP42	C9QP42;Q02748;Q9VHS8	C9QP42;Q02748	9;9;1	9;9;1	9;9;1	Eukaryotic initiation factor 4A	eIF-4a	;	3	9	9	9	26.8	26.8	26.8	45.878	403	403;403;399	0	80.806	125560000	125560000	17	17	33	139;168;252;270;280;291;376;897;939	True;True;True;True;True;True;True;True;True	149;181;271;291;301;312;404;963;1006	180;225;338;339;364;379;380;394;519;520;1257;1304	266;267;347;348;556;557;558;594;595;625;626;627;643;873;874;2141;2210	266;347;556;594;627;643;874;2141;2210	34	119
M9PIA6	M9PIA6;E1JI46;Q59E34;O97159	M9PIA6;E1JI46;Q59E34;O97159	2;2;2;2	2;2;2;2	2;2;2;2	Chromodomain-helicase-DNA-binding protein Mi-2 homolog	Mi-2	;;;	4	2	2	2	1.3	1.3	1.3	223.13	1973	1973;1982;1983;1982	0	11.762	5045600	5045600	2	2	52	53;74	True;True	56;78	65;91	96;131	96;131
E1JJM9	E1JJM9;P48149;Q7KR04	E1JJM9;P48149;Q7KR04	2;2;1	2;2;1	2;2;1	40S ribosomal protein S15Aa;40S ribosomal protein S15Ab	RpS15Aa;RpS15Ab	;;	3	2	2	2	16.9	16.9	16.9	14.771	130	130;130;130	0	12.747	8899900	8899900	2	2	53	305;409	True;True	327;438	412;564	670;960	670;960
E1JJS2	E1JJS2;M9NFH4;Q9VRA6;X2JEI9	E1JJS2;M9NFH4;Q9VRA6;X2JEI9	1;1;1;1	1;1;1;1	1;1;1;1		RhoGAP19D	;;;	4	1	1	1	1	1	1	222.27	2109	2109;2135;2181;2206	0.008	5.9602	2162800	2162800	1	1	54	967	True	1035	1339	2265	2265
F3YDH0	F3YDH0;P29844	F3YDH0;P29844	15;15	12;12	12;12	Heat shock 70 kDa protein cognate 3	Hsc70-3	;	2	15	12	12	28	22.1	22.1	72.26	656	656;656	0	82.465	121610000	121610000	13	13	55	34;100;112;128;207;366;400;406;553;598;599;603;865;929;950	True;True;True;True;True;False;True;True;False;True;True;True;False;True;True	35;104;117;136;224;392;428;435;592;593;646;647;652;931;995;1018	43;122;144;165;277;278;500;501;550;560;756;757;758;838;839;844;1219;1293;1319	66;175;211;242;429;430;839;840;841;842;843;927;952;1278;1279;1280;1281;1282;1283;1419;1420;1421;1427;2073;2074;2075;2191;2232	66;175;211;242;429;843;927;952;1280;1419;1421;1427;2074;2191;2232	31	153
G3M3A2	G3M3A2;Q06559	G3M3A2;Q06559	2;2	2;2	2;2	40S ribosomal protein S3	RpS3	;	2	2	2	2	8.1	8.1	8.1	27.471	246	246;246	0	16.58	14245000	14245000	1	1	56	167;341	True;True	180;363	224;460	346;771	346;771
G7H829	G7H829;Q9V3Z6	G7H829;Q9V3Z6	2;2	2;2	2;2	Myosin-VIIa	ck	;	2	2	2	2	1.1	1.1	1.1	250.31	2167	2167;2167	0	10.838	3055000	3055000	2	2	57	461;796	True;True	493;858	630;1125	1081;1896	1081;1896
X2JH42	X2JH42;L0MQ04;Q05825;Q8T4C4	X2JH42;L0MQ04;Q05825;Q8T4C4	3;3;3;2	3;3;3;2	3;3;3;2	ATP synthase subunit beta;ATP synthase subunit beta, mitochondrial	ATPsynbeta;ATPsyn-beta;ATPsynbetaL	;;;	4	3	3	3	7.9	7.9	7.9	54.107	505	505;511;505;622	0	22.911	15256000	15256000	3	3	58	242;350;852	True;True;True	260;374;918	326;475;1203	520;797;2034	520;797;2034
M9PB90	M9PB90;Q9VKY2	M9PB90;Q9VKY2	1;1	1;1	1;1	Cullin-associated NEDD8-dissociated protein 1	Cand1	;	2	1	1	1	1.1	1.1	1.1	139.35	1248	1248;1248	0	6.7117	4055900	4055900	1	1	59	71	True	75	88	127	127
M9PDQ0	M9PDQ0;M9PBI5;M9PGV6;P13395	M9PDQ0;M9PBI5;M9PGV6;P13395	3;3;3;3	3;3;3;3	3;3;3;3	Spectrin alpha chain	alpha-Spec	;;;	4	3	3	3	1.4	1.4	1.4	279.55	2425	2425;2447;2457;2415	0	17.367	9932300	9932300	3	3	60	124;140;377	True;True;True	130;150;405	159;181;521	233;268;875	233;268;875
M9PBL3	M9PBL3;P02828	M9PBL3;P02828	18;18	18;18	18;18	Heat shock protein 83	Hsp83	;	2	18	18	18	26.1	26.1	26.1	81.864	717	717;717	0	142.59	269340000	269340000	32	32	61	10;46;121;141;150;151;176;177;317;322;628;665;676;721;766;803;963;983	True;True;True;True;True;True;True;True;True;True;True;True;True;True;True;True;True;True	10;47;127;151;162;163;189;190;339;344;677;720;731;778;827;866;1031;1051	10;56;155;182;197;198;199;235;236;237;432;438;881;943;944;959;1019;1087;1134;1135;1334;1357	12;84;85;226;269;300;301;302;303;366;367;368;369;370;721;722;732;1487;1488;1596;1597;1598;1621;1622;1722;1723;1847;1848;1913;1914;2257;2295	12;85;226;269;301;302;367;368;721;732;1487;1596;1622;1723;1848;1913;2257;2295
Q9VQ94	Q9VQ94;M9PC99	Q9VQ94;M9PC99	2;2	2;2	2;2		Sec24CD	;	2	2	2	2	2.1	2.1	2.1	129.27	1193	1193;1231	0	11.97	7784200	7784200	2	2	62	825;934	True;True	889;1001	1164;1299	1969;2203	1969;2203
M9PCC1	M9PCC1;O18640	M9PCC1;O18640	2;2	2;2	2;2	Guanine nucleotide-binding protein subunit beta-like protein	Rack1	;	2	2	2	2	7.9	7.9	7.9	35.618	318	318;318	0	12.597	7403900	7403900	2	2	63	47;834	True;True	48;898	57;1176	86;1986	86;1986
M9PHG4	M9PHG4;M9PF16;Q00963	M9PHG4;M9PF16;Q00963	2;2;2	2;2;2	2;2;2	Spectrin beta chain	beta-Spec	;;	3	2	2	2	1.1	1.1	1.1	249.56	2147	2147;2308;2291	0	12.596	10244000	10244000	2	2	64	490;879	True;True	523;945	671;1233	1148;2099	1148;2099
M9PID3	M9PID3;M9PG82;M9PG20;Q9VPB0	M9PID3;M9PG82;M9PG20;Q9VPB0	1;1;1;1	1;1;1;1	1;1;1;1		HIPP1	;;;	4	1	1	1	1.2	1.2	1.2	99.652	923	923;924;925;926	0	6.0707	12765000	12765000	1	1	65	68	True	72	85	124	124	50;51	592;594
M9PJN8	M9PJN8;P07487;P07486	M9PJN8;P07487;P07486	1;1;1	1;1;1	1;1;1	Glyceraldehyde-3-phosphate dehydrogenase;Glyceraldehyde-3-phosphate dehydrogenase 2;Glyceraldehyde-3-phosphate dehydrogenase 1	Gapdh2;Gapdh1	;;	3	1	1	1	4.2	4.2	4.2	35.369	332	332;332;332	0	7.5601	6198200	6198200	1	1	66	915	True	981	1277	2169	2169
O62621	O62621	O62621	1	1	1	Coatomer subunit beta	betaCop		1	1	1	1	1.2	1.2	1.2	102.71	914	914	0	6.3851	4721300	4721300	1	1	67	443	True	474	609	1049	1049
P82910	P82910;P02825;Q9VG58;Q9BIS2;Q9BIR7;Q8INI8;O97125;P11146	P82910;P02825;Q9VG58;Q9BIS2;Q9BIR7;Q8INI8;O97125	6;6;5;5;5;5;4;2	4;4;3;3;3;3;2;1	4;4;3;3;3;3;2;1	Major heat shock 70 kDa protein Aa;Major heat shock 70 kDa protein Ab;Major heat shock 70 kDa protein Bbb;Major heat shock 70 kDa protein Bb;Major heat shock 70 kDa protein Bc;Major heat shock 70 kDa protein Ba;Heat shock protein 68	Hsp70Aa;Hsp70Ab;Hsp70Bbb;Hsp70Bb;Hsp70Bc;Hsp70Ba;Hsp68	;;;;;;	8	6	4	4	12.5	8.3	8.3	70.159	642	642;642;641;641;641;641;635;633	0	25.904	42253000	42253000	5	5	68	90;367;743;830;865;921	True;True;False;True;False;True	94;393;803;894;931;987	110;502;1054;1055;1169;1219;1285	157;844;845;846;1791;1792;1793;1794;1974;2073;2074;2075;2182	157;846;1794;1974;2074;2182
X2JFG0	X2JFG0;P05990	X2JFG0;P05990	16;16	16;16	16;16	CAD protein;Glutamine-dependent carbamoyl-phosphate synthase;Aspartate carbamoyltransferase;Dihydroorotase	r	;	2	16	16	16	8.6	8.6	8.6	246.67	2224	2224;2224	0	103.52	84075000	84075000	18	18	69	116;158;191;195;204;248;267;364;378;475;570;754;772;882;895;912	True;True;True;True;True;True;True;True;True;True;True;True;True;True;True;True	121;171;207;211;221;267;288;390;406;507;614;815;833;948;961;978	148;212;259;263;264;274;334;360;498;522;646;792;1070;1094;1237;1255;1274	215;216;333;404;410;411;425;551;588;837;876;1102;1340;1341;1820;1860;2104;2139;2165	216;333;404;410;425;551;588;837;876;1102;1340;1820;1860;2104;2139;2165
P06605	P06605;P06603;P06604	P06605;P06603;P06604	12;12;7	12;12;7	12;12;7	Tubulin alpha-3 chain;Tubulin alpha-1 chain;Tubulin alpha-2 chain	alphaTub84D;alphaTub84B;alphaTub85E	;;	3	12	12	12	33.1	33.1	33.1	49.89	450	450;450;449	0	78.599	275840000	275840000	19	19	70	129;164;355;455;532;585;629;630;786;838;878;980	True;True;True;True;True;True;True;True;True;True;True;True	137;177;381;487;567;630;678;679;847;903;944;1048	166;220;484;623;722;814;815;882;883;1111;1185;1232;1354	243;244;342;812;813;814;1069;1228;1229;1376;1377;1378;1379;1489;1490;1878;2005;2006;2098;2286	243;342;813;1069;1228;1377;1489;1490;1878;2006;2098;2286	52	398
P08736	P08736;A4V3Q6;P05303	P08736;A4V3Q6;P05303	4;2;2	4;2;2	4;2;2	Elongation factor 1-alpha 1;Elongation factor 1-alpha;Elongation factor 1-alpha 2	Ef1alpha48D;Ef1alpha100E	;;	3	4	4	4	11.7	11.7	11.7	50.306	463	463;462;462	0	30.061	70922000	66512000	6	6	71	517;547;750;868	True;True;True;True	552;584;585;811;934	705;748;749;1065;1222	1207;1267;1268;1269;1814;2079	1207;1267;1814;2079	53	155
X2JCP8	X2JCP8;P10987;M9PFZ6;A0A0B4LH50;P02572;P83967;P53501;P10981;P02574;P45891	X2JCP8;P10987;M9PFZ6;A0A0B4LH50;P02572;P83967;P53501;P10981;P02574	6;6;5;5;5;5;5;5;5;1	6;6;5;5;5;5;5;5;5;1	6;6;5;5;5;5;5;5;5;1	Actin-5C;Actin-42A;Actin, indirect flight muscle;Actin-57B;Actin-87E;Actin, larval muscle	Act5C;Act79B;Act87E;Act42A;Act88F;Act57B	;;;;;;;;	10	6	6	6	18.4	18.4	18.4	41.821	376	376;376;376;376;376;376;376;376;376;376	0	43.85	73090000	73090000	8	8	72	17;79;296;358;618;854	True;True;True;True;True;True	18;83;317;384;667;920	21;97;98;400;487;863;864;1206	33;34;140;141;653;654;817;1453;1454;2037;2038	33;141;654;817;1454;2038
P13060	P13060	P13060	5	5	5	Elongation factor 2	EF2		1	5	5	5	6.3	6.3	6.3	94.458	844	844	0	33.965	48729000	48729000	7	7	73	86;240;746;907;977	True;True;True;True;True	90;258;806;973;1045	106;324;1059;1268;1350;1351	151;518;1804;1805;2157;2278;2279	151;518;1804;2157;2279
P15348	P15348	P15348	3	3	3	DNA topoisomerase 2	Top2		1	3	3	3	2.6	2.6	2.6	164.39	1447	1447	0	18.697	5083000	5083000	3	3	74	321;345;704	True;True;True	343;368;761	437;469;995	731;786;1680	731;786;1680
P28668	P28668	P28668	5	5	5	Bifunctional glutamate/proline--tRNA ligase;Glutamate--tRNA ligase;Proline--tRNA ligase	Aats-glupro		1	5	5	5	3.8	3.8	3.8	189.41	1714	1714	0	30.744	19272000	19272000	5	5	75	31;502;700;713;885	True;True;True;True;True	32;535;757;770;951	40;685;988;1010;1242	63;1171;1669;1709;2113	63;1171;1669;1709;2113
X2JC31	X2JC31;P29742	X2JC31;P29742	32;32	32;32	32;32	Clathrin heavy chain	Chc	;	2	32	32	32	22.2	22.2	22.2	191.18	1678	1678;1678	0	241.05	409450000	391830000	52	52	76	9;24;25;41;42;87;201;277;312;334;363;411;435;438;459;468;496;505;593;650;662;781;800;815;851;853;861;867;881;887;955;976	True;True;True;True;True;True;True;True;True;True;True;True;True;True;True;True;True;True;True;True;True;True;True;True;True;True;True;True;True;True;True;True	9;25;26;42;43;91;217;298;334;356;389;440;466;469;491;500;529;538;641;703;715;716;842;863;878;916;917;919;927;933;947;953;1023;1044	9;30;31;32;50;51;52;107;270;374;375;422;453;496;497;566;600;604;628;637;679;689;833;920;921;936;937;938;1105;1106;1130;1149;1201;1202;1204;1205;1214;1215;1221;1235;1236;1244;1324;1349	11;46;47;48;77;78;79;152;420;617;618;692;693;761;834;835;836;964;965;1034;1035;1042;1079;1088;1164;1177;1178;1413;1414;1563;1564;1565;1586;1587;1588;1871;1872;1873;1904;1940;2031;2032;2033;2035;2036;2067;2068;2069;2077;2078;2101;2102;2103;2115;2238;2277	11;47;48;77;78;152;420;617;693;761;836;964;1035;1042;1079;1088;1164;1177;1414;1564;1587;1871;1904;1940;2031;2036;2069;2078;2101;2115;2238;2277	54;55;56;57	73;95;104;181
P34739	P34739	P34739	3	3	3	Transcription termination factor 2	lds		1	3	3	3	2.9	2.9	2.9	118.37	1061	1061	0	22.927	17729000	17729000	4	4	77	794;919;946	True;True;True	856;985;1013	1122;1123;1282;1311	1893;1894;2177;2218	1894;2177;2218
P35381	P35381	P35381	11	11	11	ATP synthase subunit alpha, mitochondrial	blw		1	11	11	11	20.3	20.3	20.3	59.421	552	552	0	75.25	76816000	76816000	13	13	78	78;136;175;278;298;462;670;767;779;902;935	True;True;True;True;True;True;True;True;True;True;True	82;146;188;299;320;494;725;828;840;968;1002	96;176;177;234;376;404;631;950;1088;1103;1263;1300	139;258;259;260;364;365;619;659;1082;1612;1849;1869;2151;2204	139;259;364;619;659;1082;1612;1849;1869;2151;2204
X2JGM9	X2JGM9;P41042	X2JGM9;P41042	1;1	1;1	1;1	40S ribosomal protein S4	RpS4	;	2	1	1	1	3.1	3.1	3.1	29.134	261	261;261	0	6.321	1956100	1956100	1	1	79	474	True	506	645	1101	1101
P41094	P41094	P41094	1	1	1	40S ribosomal protein S18	RpS18		1	1	1	1	7.9	7.9	7.9	17.611	152	152	0	6.4574	3175100	3175100	1	1	80	984	True	1052	1358	2296	2296
P45437	P45437	P45437	5	5	5	Coatomer subunit beta	betaCop		1	5	5	5	5.5	5.5	5.5	107.41	964	964	0	28.78	19003000	19003000	5	5	81	115;555;568;890;954	True;True;True;True;True	120;596;612;956;1022	147;763;784;1248;1323	214;1291;1322;2121;2237	214;1291;1322;2121;2237
Q7KVC2	Q7KVC2;P46863	Q7KVC2;P46863	1;1	1;1	1;1	Kinesin-like protein;Bipolar kinesin KRP-130	CG32318-RA;Klp61F	;	2	1	1	1	6.7	6.7	6.7	18.708	164	164;1066	0	6.7362	3810200	3810200	1	1	82	671	True	726	951	1613	1613
P48159	P48159	P48159	1	1	1	60S ribosomal protein L23	RpL23		1	1	1	1	7.9	7.9	7.9	14.936	140	140	0.0077519	5.8809	2456000	2456000	2	2	83	591	True	637	826;827	1403;1404	1403
P48591	P48591	P48591	5	5	5	Ribonucleoside-diphosphate reductase large subunit	RnrL		1	5	5	5	7.1	7.1	7.1	91.977	812	812	0	46.139	40963000	40963000	8	8	84	359;511;534;672;914	True;True;True;True;True	385;545;569;727;980	488;697;724;952;953;1276	818;819;1189;1231;1614;1615;2167;2168	819;1189;1231;1614;2167
P55828	P55828	P55828	1	1	1	40S ribosomal protein S20	RpS20		1	1	1	1	12.5	12.5	12.5	13.488	120	120	0	8.8224	19969000	19969000	5	5	85	105	True	109	130;131	187;188;189;190;191	188
Q7KN97	Q7KN97;Q0E9E2	Q7KN97;Q0E9E2	35;35	35;35	35;35	Pyruvate carboxylase	PCB	;	2	35	35	35	34.3	34.3	34.3	130.86	1181	1181;1197	0	294.94	852950000	815980000	84	84	86	13;18;21;22;37;92;117;179;180;187;206;225;231;247;293;306;339;347;426;493;675;686;694;752;758;841;848;850;870;875;888;933;937;966;985	True;True;True;True;True;True;True;True;True;True;True;True;True;True;True;True;True;True;True;True;True;True;True;True;True;True;True;True;True;True;True;True;True;True;True	13;19;22;23;38;96;122;123;192;193;194;203;223;243;249;266;314;328;361;370;456;457;526;730;741;742;751;813;819;906;913;915;936;941;954;1000;1004;1034;1053	13;22;26;27;28;46;112;113;149;150;151;239;240;241;242;243;254;255;276;306;313;314;333;396;413;458;471;587;588;674;957;958;970;971;981;1067;1076;1188;1197;1198;1200;1224;1229;1245;1246;1298;1302;1338;1359	16;35;40;41;42;43;44;69;159;160;161;162;217;218;219;220;221;373;374;375;376;377;378;398;399;400;427;428;481;482;483;494;495;496;549;550;645;671;672;768;788;994;995;996;1152;1153;1619;1620;1637;1638;1639;1640;1659;1816;1817;1828;1829;1830;2009;2010;2024;2025;2026;2027;2029;2030;2082;2083;2093;2094;2095;2116;2117;2118;2119;2200;2201;2202;2206;2207;2263;2264;2297;2298	16;35;42;44;69;160;220;375;377;400;428;481;494;549;645;672;768;788;994;1152;1619;1637;1659;1817;1830;2010;2025;2030;2083;2093;2119;2202;2207;2263;2297	58;59;60;61	212;569;746;1119
Q24478	Q24478	Q24478	2	2	2	Centrosome-associated zinc finger protein CP190	Cp190		1	2	2	2	2.1	2.1	2.1	121.68	1096	1096	0	17.479	15692000	15692000	2	2	87	839;871	True;True	904;937	1186;1225	2007;2084	2007;2084
Q24560	Q24560;A1ZBL0;P61857;A0A0B4LGH1;P08841;Q9VAX7;Q8MST5;CON__ENSEMBL:ENSBTAP00000025008	Q24560;A1ZBL0;P61857	14;12;9;6;6;5;5;4	14;12;9;6;6;5;5;4	14;12;9;6;6;5;5;4	Tubulin beta-1 chain;Tubulin beta-2 chain	betaTub56D;betaTub85D	;;	8	14	14	14	32.2	32.2	32.2	50.147	447	447;456;446;453;454;457;457;536	0	129.13	308560000	262210000	35	35	88	48;80;165;202;237;386;389;391;421;451;476;558;771;979	True;True;True;True;True;True;True;True;True;True;True;True;True;True	49;50;84;178;218;219;255;414;417;419;450;482;483;508;600;832;1047	58;59;99;221;222;271;272;321;531;535;539;577;618;619;647;648;769;1093;1353	87;88;89;90;142;143;343;344;421;422;423;509;510;511;512;886;897;898;904;982;1061;1062;1063;1064;1065;1103;1104;1105;1300;1855;1856;1857;1858;1859;2285	90;143;343;422;509;886;898;904;982;1065;1103;1300;1855;2285	62;63;64;65;66;67	1;257;267;293;330;388
X2JB48	X2JB48;Q26365;O62526	X2JB48;Q26365	5;5;2	5;5;2	5;5;2	ADP,ATP carrier protein	sesB	;	3	5	5	5	16.4	16.4	16.4	32.909	299	299;312;307	0	30.165	56664000	56664000	5	5	89	99;190;245;606;770	True;True;True;True;True	103;206;264;655;831	121;258;330;847;1092	174;403;543;1430;1854	174;403;543;1430;1854
Q76NQ0	Q76NQ0	Q76NQ0	1	1	1	Dolichyl-diphosphooligosaccharide--protein glycosyltransferase subunit 1			1	1	1	1	2.4	2.4	2.4	51.709	458	458	0	6.3134	4025700	4025700	0	0	90	365	True	391	499	838	838
Q7KK96	Q7KK96	Q7KK96	3	3	3	Structural maintenance of chromosomes protein	SMC2		1	3	3	3	2.5	2.5	2.5	134.33	1179	1179	0	20.578	7290200	7290200	3	3	91	189;795;820	True;True;True	205;857;883	257;1124;1155	402;1895;1955	402;1895;1955
Q7KN75	Q7KN75	Q7KN75	21	21	21		Dp1		1	21	21	21	16.8	16.8	16.8	144.27	1301	1301	0	157.87	267550000	267550000	30	30	92	75;94;148;163;198;205;300;301;356;371;380;460;551;600;617;626;753;877;908;918;944	True;True;True;True;True;True;True;True;True;True;True;True;True;True;True;True;True;True;True;True;True	79;98;159;176;214;222;322;323;382;399;408;492;590;648;666;675;814;943;974;984;1011	92;115;192;218;219;267;275;406;407;485;512;513;524;629;754;840;862;879;1068;1069;1231;1269;1281;1309	132;133;167;287;288;340;341;415;416;426;661;662;815;864;865;878;1080;1276;1422;1451;1452;1485;1818;1819;2097;2158;2175;2176;2215;2216	132;167;287;341;415;426;661;662;815;864;878;1080;1276;1422;1451;1485;1818;2097;2158;2175;2216	68	163
Q8IPF5	Q8IPF5;Q9VLL3;Q86BM5	Q8IPF5;Q9VLL3;Q86BM5	2;2;2	2;2;2	2;2;2		Akap200	;;	3	2	2	2	10.8	10.8	10.8	38.168	372	372;753;837	0	13.932	14564000	14564000	2	2	93	133;669	True;True	143;724	172;949	251;1611	251;1611
Q8INM3	Q8INM3;Q9VGZ8	Q8INM3	10;2	10;2	10;2	Protein slender lobes	sle		2	10	10	10	10.2	10.2	10.2	158.65	1420	1420;674	0	71.386	94117000	94117000	17	17	94	45;166;382;491;528;679;706;802;806;869	True;True;True;True;True;True;True;True;True;True	46;179;410;524;563;734;763;865;869;935	55;223;526;527;672;717;962;997;998;1133;1139;1223	82;83;345;880;881;1149;1150;1221;1222;1627;1687;1688;1912;1922;1923;2080;2081	82;345;881;1150;1222;1627;1687;1912;1923;2080
Q8IQV9	Q8IQV9	Q8IQV9	5	5	5		Nup205		1	5	5	5	3.2	3.2	3.2	235.14	2090	2090	0	43.091	12407000	12407000	5	5	96	106;477;663;699;716	True;True;True;True;True	110;509;717;756;773	132;649;939;987;1013	192;1106;1589;1668;1712	192;1106;1589;1668;1712
Q8IRG6	Q8IRG6	Q8IRG6	2	2	2	FACT complex subunit spt16	dre4		1	2	2	2	1.9	1.9	1.9	123.58	1083	1083	0	11.276	3277000	3277000	1	1	97	57;173	True;True	61;186	72;232	104;362	104;362
Q9W0E4	Q9W0E4;Q8IRH0;Q8IRH1	Q9W0E4;Q8IRH0;Q8IRH1	2;2;2	2;2;2	2;2;2		Psa	;;	3	2	2	2	2.4	2.4	2.4	99.326	866	866;1053;1075	0	17.085	17161000	17161000	3	3	98	843;975	True;True	908;1043	1190;1348	2012;2013;2276	2013;2276
Q8MSQ4	Q8MSQ4;Q9VE37	Q8MSQ4;Q9VE37	19;15	19;15	19;15		Mekk1	;	2	19	19	19	16.4	16.4	16.4	177.35	1571	1571;1478	0	136.95	178050000	178050000	24	24	100	85;111;156;188;193;203;223;458;498;533;604;642;651;740;768;784;809;835;940	True;True;True;True;True;True;True;True;True;True;True;True;True;True;True;True;True;True;True	89;116;169;204;209;220;241;490;531;568;653;693;704;800;829;845;872;899;1007	104;105;142;143;210;256;261;273;303;627;681;723;845;904;922;1051;1089;1109;1142;1177;1305	149;150;207;208;209;210;331;401;407;424;478;1078;1166;1167;1230;1428;1527;1566;1788;1850;1876;1927;1987;2211	150;208;331;401;407;424;478;1078;1167;1230;1428;1527;1566;1788;1850;1876;1927;1987;2211	71	456
Q8MSW0	Q8MSW0	Q8MSW0	5	5	5		Aats-ile		1	5	5	5	4.6	4.6	4.6	141.1	1229	1229	0	29.552	13048000	13048000	4	4	101	114;162;542;681;953	True;True;True;True;True	119;175;577;736;1021	146;217;737;964;1322	213;339;1253;1630;2236	213;339;1253;1630;2236
Q8SX89	Q8SX89	Q8SX89	1	1	1		kuk		1	1	1	1	3.2	3.2	3.2	60.159	570	570	0.0076336	5.8661	3181000	3181000	1	1	102	755	True	816	1071	1821	1821
Q8T0J3	Q8T0J3;Q9V4P1	Q8T0J3;Q9V4P1	1;1	1;1	1;1	Actin-binding protein anillin	scra	;	2	1	1	1	2.4	2.4	2.4	66.296	616	616;1239	0	7.7448	3436200	3436200	1	1	103	849	True	914	1199	2028	2028
Q99323	Q99323	Q99323	21	1	1	Myosin heavy chain, non-muscle	zip		1	21	1	1	12.3	0.6	0.6	236.64	2057	2057	0	6.0489	6853700	6853700	1	1	104	1;2;23;33;35;43;54;95;113;290;327;335;387;414;420;430;440;441;445;464;522	False;False;False;False;True;False;False;False;False;False;False;False;False;False;False;False;False;False;False;False;False	1;2;24;34;36;44;57;99;118;311;349;357;415;443;449;461;471;472;476;496;557	1;2;29;42;44;53;66;116;145;393;446;454;532;570;576;593;606;607;611;633;710	1;2;45;65;67;80;97;168;212;641;642;747;762;763;887;972;981;1024;1045;1046;1051;1084;1212	1;2;45;65;67;80;97;168;212;642;747;762;887;972;981;1024;1045;1046;1051;1084;1212
Q9I7V0	Q9I7V0	Q9I7V0	1	1	1		Mid1		1	1	1	1	0.6	0.6	0.6	135.52	1241	1241	0	6.0768	3380300	3380300	0	0	105	751	True	812	1066	1815	1815
Q9V3A7	Q9V3A7	Q9V3A7	6	6	6	Structural maintenance of chromosomes protein	glu		1	6	6	6	4.9	4.9	4.9	159.88	1409	1409	0	35.773	22196000	22196000	6	6	106	385;470;615;720;859;911	True;True;True;True;True;True	413;502;664;777;925;977	530;639;858;1018;1212;1273	885;1090;1444;1721;2063;2164	885;1090;1444;1721;2063;2164
Q9V461	Q9V461	Q9V461	1	1	1	DNA replication licensing factor Mcm6	Mcm6		1	1	1	1	1.5	1.5	1.5	92.352	817	817	0.0076923	5.8664	2094500	2094500	1	1	107	96	True	100	117	169	169
Q9V463	Q9V463	Q9V463	3	3	3		Nup154		1	3	3	3	2.4	2.4	2.4	153.89	1365	1365	0	23.605	11307000	11307000	3	3	108	181;685;690	True;True;True	195;740;746	244;969;976	379;1636;1650	379;1636;1650
Q9V9A7	Q9V9A7	Q9V9A7	23	23	23	Probable methylcrotonoyl-CoA carboxylase beta chain, mitochondrial	l(2)04524		1	23	23	23	39.6	39.6	39.6	62.648	578	578	0	300.76	2288800000	2016700000	78	78	109	3;7;19;56;62;145;146;185;194;233;246;383;425;431;482;514;540;541;566;616;621;821;858	True;True;True;True;True;True;True;True;True;True;True;True;True;True;True;True;True;True;True;True;True;True;True	3;7;20;59;60;66;155;156;200;201;210;251;265;411;455;462;515;548;575;576;609;610;665;670;884;924	3;7;23;24;68;69;70;71;78;186;187;188;251;252;262;317;331;332;528;585;586;594;595;662;700;701;734;735;736;780;781;782;859;860;861;869;1156;1157;1158;1211	3;7;8;36;37;99;100;101;102;103;112;113;114;273;274;275;276;277;278;391;392;393;394;395;396;408;409;504;505;544;545;546;547;548;882;883;992;993;1025;1026;1027;1137;1194;1195;1196;1245;1246;1247;1248;1249;1250;1251;1252;1314;1315;1316;1317;1318;1319;1320;1445;1446;1447;1448;1449;1450;1467;1468;1469;1956;1957;1958;1959;1960;1961;1962;2061;2062	3;8;36;99;113;273;277;395;408;504;545;882;992;1026;1137;1196;1246;1250;1319;1446;1469;1960;2062	72;73;74;75	48;440;479;527
Q9V9V0	Q9V9V0	Q9V9V0	1	1	1		CstF-50		1	1	1	1	2.4	2.4	2.4	46.921	424	424	0.0075758	5.8146	5420300	5420300	1	1	111	375	True	403	518	872	872	81	138
Q9V9W7	Q9V9W7	Q9V9W7	2	2	2		rod		1	2	2	2	1.2	1.2	1.2	239.69	2089	2089	0	11.205	4210600	4210600	1	1	112	318;647	True;True	340;700	433;915	723;1555	723;1555
Q9VAY2	Q9VAY2	Q9VAY2	3	3	3		Gp93		1	3	3	3	3.9	3.9	3.9	90.238	787	787	0	17.454	11758000	11758000	3	3	114	241;428;793	True;True;True	259;459;855	325;590;1121	519;998;1892	519;998;1892
Q9VCS4	Q9VCS4	Q9VCS4	1	1	1		CG6688-RA		1	1	1	1	1.7	1.7	1.7	46.178	424	424	0	8.5623	3589000	3589000	1	1	116	466	True	498	635	1086	1086
Q9VGP4	Q9VGP4	Q9VGP4	4	4	4		Ranbp9		1	4	4	4	4.6	4.6	4.6	114.41	1018	1018	0	26.883	23658000	23658000	4	4	118	183;346;467;587	True;True;True;True	197;369;499;632	246;470;636;817	381;787;1087;1382	381;787;1087;1382
Q9VHL2	Q9VHL2	Q9VHL2	1	1	1		Tcp-1eta		1	1	1	1	2.2	2.2	2.2	59.386	544	544	0.0075188	5.7858	4928900	4928900	1	1	119	256	True	277	347	571	571
Q9VJH2	Q9VJH2	Q9VJH2	3	3	3		mdy		1	3	3	3	3.5	3.5	3.5	121.52	1082	1082	0	20.937	8603800	8603800	3	3	120	811;844;899	True;True;True	874;909;965	1144;1191;1259	1930;2014;2143	1930;2014;2143
Q9VLC5	Q9VLC5	Q9VLC5	2	2	2		Aldh		1	2	2	2	4.6	4.6	4.6	57.018	520	520	0	11.534	5156600	5156600	1	1	121	143;480	True;True	153;513	184;660	271;1134	271;1134
Q9VN25	Q9VN25	Q9VN25	13	13	13	Eukaryotic translation initiation factor 3 subunit A	eIF3-S10		1	13	13	13	13.4	13.4	13.4	133.88	1140	1140	0	95.841	85495000	85495000	17	17	122	20;38;55;82;108;134;211;224;450;512;655;656;734	True;True;True;True;True;True;True;True;True;True;True;True;True	21;39;58;86;112;144;228;242;481;546;708;709;794	25;47;67;101;134;173;284;304;305;617;698;926;927;1044	38;39;70;98;145;194;252;445;479;480;1059;1060;1190;1191;1571;1572;1775	38;70;98;145;194;252;445;479;1060;1191;1571;1572;1775	85;86	517;529
Q9VN44	Q9VN44	Q9VN44	6	6	6		Karybeta3		1	6	6	6	7.1	7.1	7.1	123.56	1105	1105	0	40.701	31305000	31305000	6	6	123	160;226;404;488;760;936	True;True;True;True;True;True	173;244;433;521;821;1003	214;307;557;558;669;1078;1301	335;484;945;946;947;1146;1835;2205	335;484;947;1146;1835;2205
Q9VNK8	Q9VNK8	Q9VNK8	1	1	1		CG15580-RA		1	1	1	1	1.7	1.7	1.7	86.438	743	743	0.0074627	5.7594	11680000	11680000	1	1	124	313	True	335	423	694	694
Q9VP57	Q9VP57	Q9VP57	2	2	2		pzg		1	2	2	2	3.2	3.2	3.2	105.08	996	996	0	12.124	8098900	8098900	2	2	125	328;714	True;True	350;771	447;1011	748;1710	748;1710
Q9VW54	Q9VW54	Q9VW54	3	3	3		Rpn1		1	3	3	3	4.8	4.8	4.8	102.28	919	919	0	25.602	22342000	22342000	3	3	126	81;215;787	True;True;True	85;232;848	100;289;1112	144;450;1879	144;450;1879
Q9VXQ2	Q9VXQ2;X2JDY8	Q9VXQ2;X2JDY8	2;2	2;2	2;2		Graf	;	2	2	2	2	3	3	3	114.71	1016	1016;1025	0	12.443	12695000	12695000	2	2	127	221;230	True;True	239;248	299;312	469;493	469;493
Q9VXQ5	Q9VXQ5	Q9VXQ5	1	1	1		Tcp-1zeta		1	1	1	1	3	3	3	58.246	533	533	0	6.0607	3861400	3861400	1	1	128	791	True	853	1119	1890	1890
Q9VXW7	Q9VXW7	Q9VXW7	33	33	32		gce		1	33	33	32	36.9	36.9	36.2	105.84	959	959	0	323.31	8028300000	7220400000	145	145	129	11;12;212;216;269;279;287;288;295;297;348;481;574;589;590;632;636;652;678;687;698;705;708;709;726;728;730;731;814;883;884;952;962	True;True;True;True;True;True;True;True;True;True;True;True;True;True;True;True;True;True;True;True;True;True;True;True;True;True;True;True;True;True;True;True;True	11;12;229;233;234;290;300;308;309;316;318;319;371;372;514;618;634;635;636;682;683;687;705;733;743;755;762;765;766;784;785;787;789;790;791;877;949;950;1020;1030	11;12;285;290;291;292;293;363;377;378;387;388;389;390;391;398;399;401;402;403;472;473;661;796;820;821;822;823;824;825;886;887;888;895;923;961;972;973;985;986;996;1001;1002;1003;1004;1027;1028;1029;1030;1031;1032;1034;1035;1036;1038;1039;1040;1041;1147;1148;1238;1239;1240;1241;1321;1332;1333	13;14;15;446;451;452;453;454;455;456;457;458;592;593;620;621;622;623;624;635;636;637;638;639;647;648;649;650;651;652;655;656;657;658;789;790;791;792;793;794;1135;1136;1346;1347;1386;1387;1388;1389;1390;1391;1392;1393;1394;1395;1396;1397;1398;1399;1400;1401;1402;1493;1494;1495;1496;1497;1512;1567;1625;1626;1641;1642;1643;1644;1645;1666;1667;1681;1682;1683;1684;1685;1686;1694;1695;1696;1697;1698;16…	13;15;446;451;593;624;636;637;650;657;792;1135;1347;1399;1400;1497;1512;1567;1626;1642;1666;1681;1696;1700;1749;1758;1769;1771;1935;2108;2109;2235;2251	87;88;89;90;91;92;93	143;338;564;577;592;731;909
Q9VYW2	Q9VYW2	Q9VYW2	20	19	19		Met		1	20	19	19	28.4	27.4	27.4	78.692	716	716	0	314.11	2371000000	1855300000	86	86	130	14;110;144;253;310;351;352;507;544;545;588;631;633;634;635;759;807;889;901;952	True;True;True;True;True;True;True;True;True;True;True;True;True;True;True;True;True;True;True;False	14;15;114;115;154;272;332;375;376;377;378;540;541;579;580;581;582;633;680;681;684;685;686;820;870;955;967;1020	14;15;16;17;136;137;138;139;140;141;185;340;419;420;476;477;478;479;480;481;691;692;693;739;740;741;742;743;744;745;746;818;819;884;885;889;890;891;892;893;894;1077;1140;1247;1261;1262;1321	17;18;19;20;21;22;23;24;25;26;196;197;198;199;200;201;202;203;204;205;206;272;559;560;561;686;687;688;689;690;798;799;800;801;802;803;804;805;806;807;808;809;1181;1182;1183;1255;1256;1257;1258;1259;1260;1261;1262;1263;1264;1265;1383;1384;1385;1491;1492;1498;1499;1500;1501;1502;1503;1504;1505;1506;1507;1508;1509;1510;1511;1831;1832;1833;1834;1924;1925;2120;2147;2148;2149;2150;2235	21;206;272;560;687;800;807;1182;1261;1265;1384;1491;1504;1508;1511;1833;1924;2120;2148;2235	94;95;96;97;98;99	62;260;428;441;456;529
Q9W0B8	Q9W0B8	Q9W0B8	8	8	8	Coatomer subunit alpha	alphaCOP		1	8	8	8	7.1	7.1	7.1	139.33	1234	1234	0	48.748	34728000	34728000	8	8	131	452;492;519;521;738;792;896;942	True;True;True;True;True;True;True;True	484;525;554;556;798;854;962;1009	620;673;707;709;1049;1120;1256;1307	1066;1151;1209;1211;1785;1891;2140;2213	1066;1151;1209;1211;1785;1891;2140;2213
Q9W2L2	Q9W2L2	Q9W2L2	3	3	3		Magi		1	3	3	3	3.1	3.1	3.1	130.56	1202	1202	0	21.982	10650000	10650000	2	2	132	674;813;941	True;True;True	729;876;1008	956;1146;1306	1618;1932;2212	1618;1932;2212
Q9W3D2	Q9W3D2;Q9W3D3	Q9W3D2;Q9W3D3	1;1	1;1	1;1		Crag	;	2	1	1	1	0.7	0.7	0.7	184	1644	1644;1671	0.0078125	5.8883	0	0	1	1	133	308	True	330	415	674	674
Q9XYU0	Q9XYU0	Q9XYU0	4	4	4	DNA replication licensing factor Mcm7	Mcm7		1	4	4	4	7.2	7.2	7.2	81.283	720	720	0	27.055	35206000	35206000	5	5	134	527;557;733;925	True;True;True;True	562;599;793;991	715;716;768;1043;1289	1219;1220;1299;1774;2186	1220;1299;1774;2186	100	237
Q9XZU1	Q9XZU1	Q9XZU1	1	1	1	Exportin-2	Cas		1	1	1	1	0.9	0.9	0.9	110.17	975	975	0.0074074	5.7553	2391900	2391900	0	0	135	780	True	841	1104	1870	1870
